# Supplementary material for: Identification of lung adenocarcinoma subtypes and predictive signature for prognosis, immune features, and immunotherapy based on immune checkpoint genes
Source: Front Cell Dev Biol. 2023 May 10;11:1060086. doi: 10.3389/fcell.2023.1060086 (PMC10206047; doi:10.3389/fcell.2023.1060086)
Supplement: Supplementary file 11 [file Table5.XLSX]

## Sheet: TCGA
black	blue	green	grey	magenta	pink	purple	red	tan	turquoise	yellow
ASB2	PFN2	IL32	RPL23A	LNPEP	DNAH3	PTPRB	FCGR2B	PRG4	RNF44	GLI3
CD79B	ST3GAL6	IL27RA	CALB2	KIF1B	SERPINB11	CSPG4	EPB41L2	CDO1	MFSD3	GNA12
BTLA	PKP2	CD1C	PHEX	DCP2	FANK1	FXYD6	VNN2	NFASC	PIGV	MATN3
MCOLN2	TOMM40	KCNJ5	TLL2	SRFBP1	SERPINB3	LRRC32	KBTBD8	KCNA5	ZNF708	ISLR2
EOMES	PKMYT1	CRYBB1	NUCB2	PHF3	WFDC6	PRX	DOCK10	ITIH5	SIN3B	SGCB
FCRL1	SLC2A1	WAS	DACH1	MTX3	TSPAN19	CA4	LYZ	LGI3	PTPN4	HS3ST3A1
GBP5	TNNT1	SPI1	SERTAD2	UBE4A	STOX1	MMRN2	ICA1	PLSCR4	MAF1	RASD2
GPR171	TTC5	CLEC5A	KRT1	PTPN14	SEC14L3	CD248	SLA	FABP4	FOXP1	DPYSL3
STAT1	LDHA	ASGR1	SLC45A4	IQGAP1	ZMYND10	PCDH12	IL10RA	ELN	COX17	LSAMP
IL18BP	HSDL2	LIMD2	MTRF1	VPS13C	PAX1	BCL6B	UBE2J1	LEFTY2	FAM89B	BMP8A
RAC2	ALDOA	CMTM3	ESM1	TRRAP	C1orf87	PCDHGB7	RARRES1	FBLN5	PHF1	CDH11
CD96	CDK8	LY86	MYOM2	DOCK9	EFHC1	ADCY4	TNFAIP3	SGCG	PSMB6	CTHRC1
FUT7	ITGB6	HLA-DRB6	PLCE1	BIRC6	SPATS1	PEAR1	SLC36A1	ATP1A2	TMEM52	DACT1
PSTPIP1	CAPN3	NLRP1	NLGN2	AKAP9	TEKT2	JAM2	P2RY12	SYNPO	MTF2	MMP11
TNFRSF17	RAD54L	PAWR	HAO1	DMXL1	PDZD4	CLEC14A	TFEC	MAMDC2	RBM15B	MEIS3
CXCL9	RGS20	ADAM8	PRKG2	USP34	LZTFL1	CDH5	CTSC	ABI3BP	PCMTD1	LRP1
HLA-F	TTLL4	COTL1	CHN2	BAZ2B	CNGA4	EGFL6	C1orf56	CLIC5	MAP2K7	DDR2
LGALS2	DLX6	TNFSF12	KLK8	KIAA1109	DNALI1	CYGB	TBC1D9	SPARCL1	PPOX	GLT8D2
FCRL2	DDX21	GYPC	MT1A	GOLGB1	RBM24	DYSF	IFI16	BTNL9	PHLDA2	COL8A2
SUSD3	SAP30	PML	DGKD	AHNAK	USP2	FEZ1	RGL1	HSPB7	CBL	VCAM1
ZAP70	SLPI	FBP1	TMCO1	REST	TEKT1	CLDN5	IRF8	CLDN18	CLN6	CD200
GBP2	ITGB3BP	TNFRSF14	UPP1	DDX6	CAPSL	HSPB2	DTX3L	FMO2	EVPL	PCOLCE
LTB	GPSM2	CD1A	AMN	PJA2	TTC12	RASIP1	FYN	METTL7A	PDCD6	CACNA2D1
APOBEC3C	SLC20A1	TSPAN32	KLK10	NFAT5	DNAH9	ATP1B2	SDCBP	DNASE1L3	PDE5A	PXDN
FLT3	ZNF318	NFKBIE	FHOD1	GNL3L	WDR63	EDNRB	JAK2	FMO3	PES1	SERPINF1
TNFRSF13B	RHEB	UAP1L1	PTPRH	NBEAL1	LTF	FLT4	TRIM22	RSPO2	RPL41	EMP1
SIT1	LRIG1	HS3ST2	GLRA3	VPS13D	TSPAN1	COX4I2	PLXNC1	AQP4	PLOD1	GFPT2
IFNG	RECQL	FLT3LG	GRIP1	LRP6	CCDC33	RHOJ	FNBP1	C1QTNF7	RCN3	CCL11
EBI3	PAQR3	MSI2	HCG27	HIVEP1	PTPRT	LZTS1	DOCK2	TCF21	MED31	COL6A2
BTN3A2	POPDC3	TSPAN33	GLYCTK	USP47	ZNF440	HIC1	SPIRE2	C14orf132	BCL7C	LMCD1
RHOH	SORBS2	SDC3	RPRM	KLHL15	TGM3	ARHGEF15	PARP14	ASPA	RNF5	CLSTN2
SCML4	ZC3H8	ARHGAP22	H6PD	SMCHD1	THAP10	CORO2B	CARD8	BCHE	TAF9B	HEPH
KLRB1	DENND1A	ZYX	GRAMD1C	HERC1	SPATA18	VWF	TLR2	FRZB	PLK3	TPM4
IL24	RBMS2	GAL3ST4	KCNE4	CHD1	WDR19	LIMS2	BIN2	CTSG	ARFGEF1	COPZ2
CD69	CENPE	LILRA5	HOXC13	CREBBP	TTLL10	ADAMTSL3	DOCK8	DES	HOOK3	COL16A1
CD244	ECE2	PLA2G4C	RLN1	SMAD5	DZIP1L	CYYR1	RGS1	ANGPT1	CHORDC1	MRGPRF
UBD	ACAD8	PILRA	EFS	PIK3C2A	GBP6	KLF2	PDE4B	ADH1B	PDRG1	TGFB1I1
IGLL1	NEK2	NAPSB	ERRFI1	WNK1	KCNRG	CD34	GIMAP7	ADRB2	ABCA1	MOXD1
LAG3	RAN	LAIR1	BRDT	AFF4	TTC21A	FCN3	AXL	MS4A2	KATNB1	LTBP1
POU2F2	PPT2	NFAM1	EPHA3	GOLGA4	NEK10	REM1	OVOL2	PCDHGC3	ZNF248	KIAA1755
P2RY8	PHGDH	CD300E	DIO1	KRT10	HYDIN	KCNK3	PREX1	FOXF2	BIN3	TNFSF4
ICOS	CELSR3	SLC31A2	XCL1	MACF1	CLCA2	LAMC3	ATP6V1B2	HMCN1	RTN2	OR51E1
HLA-B	PBK	TMEM26	ZNF304	ZNF236	SPA17	ACVRL1	MS4A7	HSPB6	ZFYVE19	LAMC2
GZMH	PRPF19	STX11	PLP2	TRIP11	IQCD	OLFML2A	P2RY13	INMT	OSBPL5	DLG2
CD3D	FMO5	CD33	TREH	THOC2	ANKK1	TBX3	GIMAP8	FXYD1	CRB3	FMOD
HCP5	CHRNA5	CAMK1G	HEY2	RIF1	RFX2	ADAMTS1	IFIH1	GATA5	FBXO6	KIF26B
NMI	ATP1B3	LOXL3	ACOX2	MIB1	TTLL6	CALCRL	TDRD6	GRIA1	TTLL1	TPM1
OASL	SP6	TPP1	OR51E2	ARHGEF12	CAPS	RNF122	LAP3	ITIH3	FCGRT	PLXDC2
BLNK	VIPR1	CCL8	CYP2E1	CUL5	FBXO36	EMCN	ADAM19	PRELP	ZNF622	KLK4
PRKCQ	BRCA2	RETN	STARD5	TAOK1	DYNLRB2	SIDT2	GPR65	PKNOX2	MYSM1	FBXO32
VPREB3	SAAL1	EMILIN2	ZNF551	SOS1	CD164L2	PECAM1	TNFAIP8	PLAC9	PTPN12	SULF2
OPTN	SLBP	FABP3	OGDHL	SMG1	STOML3	PODXL	FCGR3A	LBH	TYK2	NEXN
UBASH3A	RPA3	LILRB1	IL12A	EXPH5	MAP6	PLVAP	TDO2	MYH10	PSMB5	MMP2
IL21R	TSPAN3	FGD2	FGFBP1	G3BP1	CACNG6	ROBO4	CLEC2D	ABCA8	NOTCH2	MN1
ITGAD	ENO1	IL1RN	PIGA	FER	FAM3D	NPR1	LACTB	HGF	MCL1	PGF
CD40LG	MOCOS	CD300LB	GALC	PIK3R4	CCDC60	PCDH17	LCP2	GSTM5	ULK1	FBN1
CCL19	HTR1D	HAMP	RNF24	KIAA0232	GAS2L2	PDGFB	TM6SF1	CMA1	ENTPD6	MAP4K4
KLRK1	GANAB	CD74	UQCRB	KIAA2026	LRRC49	ESAM	KCTD12	CASQ2	PIGO	SFRP2
CTLA4	FKBP10	SLC15A3	ONECUT1	MYO9A	ZNF474	FHL5	CD180	ADAMTSL2	NDUFA3	RASGRF2
FCER2	CBX1	STAC3	PCBP3	DYNC1H1	EYA1	LDB2	FAM78A	FHL1	CPT2	FGF1
FCRL3	PTPRM	CD1B	LAMA1	KIF5B	C17orf50	TSPAN18	TPK1	FAT4	MAFK	NUDT10
CCL21	PPFIBP2	RGS19	DOC2A	RBM12B	ZMYND12	FLT1	GAB3	C7	SIPA1	LAMA4
ZNF80	SLC7A1	GNGT2	WNK4	ATRX	FBXO15	HEYL	RAB30	LAMA2	POLR2I	TIMP2
CD48	NUP210	DDO	GABRA3	LRBA	ALOX15	HSPA12B	CXorf21	FAM107A	RHOC	FRMD6
GZMA	RCC1	PSAP	C10orf90	YES1	C9orf116	ACE	PTPN22	IL33	UQCRC1	GPR161
CD28	C9orf152	STAB1	USP18	NUFIP2	KRT23	CLEC3B	PRKCH	MAOB	EIF2AK2	MYL9
SIRPG	LANCL2	ICAM2	GDF9	AKAP13	ANKFN1	MCAM	FCGR2A	GAS6	ZDHHC20	PHLDB2
CD7	HOXA1	HTRA4	SOSTDC1	ZBTB44	DNAI2	TCEAL7	SYT11	RUNX1T1	SLC43A2	CYTL1
MMP25	RACGAP1	SERPING1	CAND1	CHD6	NME5	ID3	TNFRSF1B	TBX2	ZNF598	IGF1
P2RY10	ENTPD3	LILRB5	KCNJ11	ASH1L	IFT88	NDST1	STK10	MYOCD	RILP	EVC
TIFAB	TTK	CCL7	MEP1A	RANBP2	ATP12A	GJA4	TIMD4	RAI2	HCFC2	MRC2
ETV7	CISH	IL22RA2	PRKACB	MFAP3	PACRG	NOTCH4	EVI2B	PRDM6	C9orf16	ADAMTS9
UBE2L6	CADPS2	HOOK1	CLCA4	SETX	FABP6	PALMD	SAMHD1	TGFBR2	CRIP1	DCHS1
SLAMF1	CTDSPL	KEL	ATAD3C	PURA	RIBC1	SOX17	CD163	DUOX1	CIZ1	MXRA7
BFSP2	GCLC	NAGA	SLC18A2	UTRN	CCDC65	THBD	RASSF2	SCN4B	NSMCE1	GPR88
PSME2	BRMS1L	ITGAM	ATP6V0E1	YTHDC2	RGS22	RAMP3	WIPF1	TBX5	RXRA	RUNX2
DUSP2	CYBRD1	HCST	ART5	ANKRD12	CYP2A13	RGS5	MAN1A1	NEGR1	APEX2	NID1
IL26	PRMT8	KCNMB1	TBX19	DENND4C	DNAI1	ENG	SP100	SGCA	TP53INP1	COL14A1
GBP4	RPS6KA2	APOC1	AKR1C2	SPTBN1	AGBL2	SEMA6B	JAZF1	CD300LG	TRAPPC1	COL6A3
CTSW	FAM24B	EMP3	ADCY2	MYCBP2	C11orf16	SOX18	CCND2	A2M	CARHSP1	ANGPT2
GBP1	IPMK	HLA-DRB1	PDE1C	ROCK1	DUSP18	ERG	BMP2K	ROBO2	STRN4	GLI2
APOBEC3F	POLR2H	BIRC7	ANKRD1	TP53BP1	DNAH5	CAV1	MAFB	PODN	KLF16	JPH2
GPR25	SSX2IP	KCNAB2	SIM2	TOP2B	DLEC1	DKK2	CD200R1	MGP	CCDC18	WT1
NKG7	SCGB3A1	TBXAS1	PON1	RAPH1	RIBC2	MYCT1	ATP10D	MFAP4	DGKQ	IGFL2
CCR4	TMEM41A	METRNL	GPR35	SLK	LDLRAD1	GPR4	ARHGAP18	PEBP4	PPP1R12A	ACTA2
TRIM69	MLPH	SIGLEC7	PCDHGA2	FEM1C	KCNH3	FGD5	PTPRC	AGER	DGKE	SYNPO2
KLRC3	CIRBP	LILRA6	S100A12	NF1	MAPK15	MYADM	P2RX7	ITGA8	IFITM1	SNAI2
ITGAE	ZNF69	RAB32	POU6F1	BDP1	GSTA2	DLL4	PLEK	SFTPC	PC	MYH11
MAP4K1	TEAD4	FTL	CALML5	MAN2A1	SCGB2A1	RASL12	HAVCR2	TGFBR3	CAMKK1	P4HA3
GFI1	ITGA10	HLA-DMA	B3GNT4	TANC1	TRPV4	SHANK3	TNFSF8	TBX4	PLOD3	SDC2
CD2	PPIF	CLEC12A	PLP1	CEP192	TEX9	SOX7	CPVL	SESN1	CCDC51	GJB2
CD247	HDAC2	PLD4	PAGE2	USP37	PPIL6	PDE2A	PARP9	CPA3	PCGF5	BICC1
MEI1	SATB1	AGRP	TMED6	MDN1	ANKRD45	NOTCH1	SAMD9L	SRPX	EMD	HS3ST3B1
LTA	PRKDC	STAC	NR2F1	GCC2	ACSBG1	EPAS1	NFATC2	GHR	TYSND1	ADAM12
CPNE5	SNRPE	CD82	ZNF566	TJP1	CCDC40	TEK	GPNMB	TNXB	IFITM2	NAV1
TRAT1	SUMO2	SCARF1	PTGS2	RASA1	VNN3	NES	IFIT2	ADAMTS8	ATP6V0D1	NTF3
PDCD1	CAMK2D	NFATC1	CDK5RAP2	GTF2I	C1orf189	SEMA3G	IFNGR1	SORBS1	PPFIA3	IGFBP3
IL18RAP	TMEM14A	MYO9B	ZNF132	STX8	PRPH	HIGD1B	LXN	ART4	DDT	FBLN2
FCRL5	NMD3	CFD	C11orf53	BRWD3	RPGR	SH2D3C	ARHGAP25	SLIT3	SPCS1	NUAK1
GNLY	DKC1	EGR2	WIF1	SYNE2	LRRIQ1	PTGIR	PPP1R16B	OGN	NKTR	PTGIS
KLHDC7B	ARHGEF2	AQP9	FGFR4	REV3L	FSIP1	RAMP2	PIK3CG	TMEM100	SIRT2	ELK3
P2RX1	SEMA3A	ARID5A	TRIM25	PANK3	SCGB1A1	LMO2	MNDA	AOC3	RELB	CSDC2
CXCR3	TK2	CSTA	MBOAT1	ANKRD26	APOBEC4	COX7A1	MSR1		MIDN	DNM1
GZMM	TOP2A	RENBP	ECHDC3	GATAD2B	WDR78	GRK5	KLHL6		RPL14	C1QTNF6
SEMA4D	RALGPS1	LILRB2	DDR1	ALMS1	KIF19	CETP	ARL6IP5		LRPAP1	ACTN1
C16orf54	SLC41A1	DNASE2B	CDH6	B3GALNT2	MAK	FAM43A	F13A1		CHMP6	FN1
KLRG1	TOB1	PSMB10	PPARA	VPS13A	SPAG17	MMRN1	DAPP1		MMP15	CRISPLD2
TMC8	DSP	CD300LF	BPI	ATM	TUB	TIE1	ST8SIA4		QKI	WNT2
SAMD3	RAB4A	HLA-DQB1	ZNF425	CSNK1A1	PROM1	STARD8	CD80		VASP	ITGBL1
TAP2	SLC25A27	PRAM1	PRB2	PHIP	MNS1	SELP	ARHGEF6		BSCL2	SLC24A3
HAPLN3	HSPE1	IL4I1	SCPEP1	CLTC	KCNJ16	FOXF1	MS4A4A		PRCC	RANBP3L
CD8A	PPIA	PLAUR	GC	ZNF609	C20orf85		IFIT3		RASSF7	FOXC2
PLA2G2D	BRIP1	CEACAM4	PDIA3	CHD2	DNAH7		MFSD1		RPAP1	CCDC8
TMIGD2	PIGX	TMEM37	NRK	CAST	PZP		VIM		COMMD4	SRPX2
CXCR6	DEPDC1	KMO	CRH	MPDZ	CLDN1		TAGAP		NQO2	SLC16A2
ICAM3	SLC6A15	ZMYND15	PDCD4	AFF1	AK7		TGM2		DPP3	TRPA1
APOBEC3D	IL12RB2	NCF4	MAPK4	NPAT	IFT172		IL7		GRINA	SCARF2
LAX1	FAM83A	APOC2	ZFHX2	VPS13B	ST6GALNAC2		PTPRJ		YIF1A	COL15A1
ZBP1	TATDN1	CD68	ANXA3	CEP290	KRT5		TLR7		IQCE	RECK
SPIB	ASF1B	GPR84	CEACAM19	HUWE1	C6orf118		FMNL3		FRS3	CHSY1
TRIM21	ALDH1B1	DOK3	PHACTR3	NDUFB1	ARMC4		DPYD		ATP11B	SFRP4
PIK3CD	POLQ	HLA-DPA1	F2RL2	KLHL11	DNAH1		TMEM106A		EML4	LRRC15
FOXP3	STC1	FCGR1A	PRRT2	NCOR1	LRRC34		CTSS		RHBDF1	TUBB6
NCR3	LYAR	NAALADL1	ZNF350	CANX	CRISP2		MYO5A		IFT140	MEOX2
TRAF1	LDLRAD2	FCGBP	ZNF664	ROCK2	ROPN1L		C2orf15		MON1A	PTGFRN
IL2RB	TUBB3	CAMK1	KCTD1	ZNF417	C9orf24		GPR82		ZFYVE28	LOXL2
ITGB7	CENPA	FGR	NR5A2	RNF169	MYCBPAP		FAS		CDR2L	FHL2
IFI35	CHEK1	GHRL	TMOD1	IPO7	IL5RA		BIRC3		FOXRED1	HTRA1
CD38	WDR3	FRMD4A	APBA2		MMP10		NPL		TMCO6	SPOCD1
BTN2A2	C3	MAPKAPK3	ANTXR2		CETN2		MITF		NEK8	TNFAIP6
BLK	IGF2BP2	GPR132	SERPINI1		PLAC8		KCNA3		ODF2	ZFPM2
PTPN7	PLA2G10	STAT5A	THOC1		RFX3		PXK		SCAMP3	FLNC
CD79A	ZNF540	CDH20	EXTL2		MLF1		CYBB		ARL2	OLFML1
CD3E	NDUFB5	LST1	PBX1		C6		CD209		RPUSD3	PCDH7
GPR174	DLL3	IL3RA	A2ML1		MDH1B		ENPP2		BLVRB	SLC38A5
KLRD1	ARRDC3	ZBED2	SLC35D3		TSGA10		PIK3AP1		PEMT	COL6A1
RBP5	UCHL1	IL1B	ZNF486		NGFR		STAT4		ST6GALNAC6	BACE1
TBC1D10C	MAP6D1	PTPN6	CFB		PIP		ABCA6		ATF7IP	ARSI
SH2D1A	SFTPA2	MEFV	NR6A1		MORN2		SYK		CUEDC1	SNAI1
ZNF101	WWC3	RASSF5	PLCD4		HS3ST6		LILRA4		OTUB1	LOXL1
ARHGAP9	NUDT1	SRP9	STK35		LRRC6		RCBTB2		SF3B5	COL11A1
CRTAM	CDC6	TGFB1	FAT3		CXCL6		FGL2		FKBP8	FSTL1
CD22	ALDH3A2	CCR6	RPS24		KCNE1		SRGN		CYC1	DKK3
DERL3	SFTPD	PPM1M	RPL9		GSTA3		PTGER4		TMTC3	COL5A2
BATF2	CLIC6	CIITA	ABHD5		DYNC2H1		PDCD1LG2		RUSC1	COL3A1
PRF1	CCT5	VAV1	CREG1		OMG		IL10		ST6GALNAC4	ADAMTS12
FCRL4	FANCG	TNIP1	GCNT2		NEK5		RAB8B		TCP11L2	SMOC2
CXCL11	RFC5	TAPBPL	CDON		TMEM67		INPP5D		LRRC56	RIN2
GZMK	CENPF	CD1E	XDH		GRIN3B		KIAA1549		TOR2A	SH3PXD2B
BANK1	NFIX	RRAD	STATH		TCTEX1D1		AMPD3		TACC1	SPARC
PSMB8	POLA2	LAT2	ABCC1		CLDN16		SOD2		ARHGEF16	IGFBP7
IRF4	INCENP	CSF2RA	AHSG		CHST9		HSD11B1		ALKBH4	FAM78B
SLAMF7	FKBP4	RAB33A	POMC		RAB36		CYSLTR1		RBM38	PDGFRA
TNFRSF13C	EPHX2	FXYD5	HSPA1L		GPR162		ABCA9		SPPL2B	COL4A1
BTN3A1	GFRA1	SIGLEC9	ZNF532		C1orf158		CLEC4C		CC2D1A	PPFIBP1
HLA-E	GPR19	OSCAR	STRA6		CCDC17		C3AR1		USP45	EMILIN1
CD3G	EPDR1	ANXA6	ATP2A3		ARMC2		ATP8B4		RNF126	MSRB3
ITM2A	MRPS35	SELPLG	ZNF700		GSTA1		ARSB		MSRB2	SPSB1
TLR10	RDM1	CSF1R	KCNE3		C22orf15		SLC9A9		HOMER3	BACH2
PAX5	PSMA7	MRAS	ZNF528		LARP6		SIGLEC8		TXNL4B	CHST11
PARP15	WDR43	SLC37A2	FOXD1		STK33		SPN		CENPB	RARRES2
CXCL10	STC2	ITGAX	AOC2		TSNAXIP1		MAF		C1orf109	PDGFRB
APOBEC3G	PLA2G4F	C1orf162	MANBA		CASC1		LPXN		SLC37A4	IL11
LCK	TPX2	PTGS1	ALDH3A1		WDR49		NLRP3		KLHL25	MXRA5
CCR7	CNOT8	GMFG	SCN2B		PRSS12		DAB2		TMEM86B	EGFLAM
IL16	PNPT1	CCL23	CASP4		AKAP14		KCNMA1		GCHFR	CNN1
BTN3A3	ATP8A1	SLC29A3	PTS		SPATA4		PRDM1		ECH1	PDGFD
LY9	NT5DC3	MGAT1	SLC39A10		OSBPL6		LHFPL2		TMEM99	LUM
AMPD1	OTUB2	MYO1F	MYH15		DNAH10		RASGRP3		CCDC71	PRSS23
AKNA	STOM	GMIP	CFL2		SRGAP3		IGSF6		PAK4	F2R
KCNN3	TMEM159	CD72	NRIP3		FOXJ1		CYP1B1		TNK2	ADAMTS14
TCL1A	CEP152	CEACAM21	ECE1		IQCG		SLC8A1		NHLRC2	COL5A3
ZBTB32	DDN	MAP3K14	PGM3		EFHB		LCP1		N4BP2	CHST1
GP1BA	METTL5	HCK	EYA2		ADH7		COLEC12		GRN	BGN
SLAMF6	TMBIM4	PDE1B	MARVELD3		LRRC46		FGD3		ATAD3B	ADAMTS16
FASLG	CSTF2	SH3BGRL3	FOXL1		CCNA1		BTK		ZNF460	GAS1
JAK3	AACS	MATK	ECM1		EFHC2		SERPINB9		GNA11	PDZRN4
CORO1A	VWA2	CCRL2	BPGM		ABCA13		CCR1		BTAF1	MMP3
B2M	CDCA2	HLA-DQB2	GPR50		MORN3		GNG2		TNKS1BP1	IBSP
IL12RB1	CYCS	CD14	NRN1		NEK11		PLCL2		DHCR7	PTPRD
AIM2	WDR62	ATP6V0D2	SLC14A1		SERPINI2		CLEC4E		RAB3A	ISLR
PYHIN1	ROS1	FCER1A	AKR1C1		SLC23A1		CHRNA6		TAF1C	MYLK
HLA-C	TMEM125	AIF1	SHC4		MAP1A		TLR1		GABARAP	PLA2G5
PNOC	TMEM50B	C1R	CCDC85A		GABRP		CLEC2B		USP21	MFAP5
RTP4	C18orf54	OXER1	NPNT		LRRC18		CLEC4A		USF1	FAP
CCL5	GNPNAT1	PRCP	TMEM164		SPAG8		RGS13		CIAPIN1	CILP2
EPSTI1	EMP2	SPOCK2	CREB3L3		SRD5A2		CCR2		MRPL40	SPRED3
CCR5	HAT1	GPSM3	BMP7		LRRC43		LIPA		SH3TC1	ACTG2
CR2	FANCA	FMNL1	SRXN1		EFCAB1		MRC1		HDAC11	COMP
FCRL6	CRYM	DPEP2	PGLYRP4		ASTN2		RASGRP1		THRA	TMEM47
PIM2	GOLT1B	ITGB2	DENND2C		SLC22A4		RNASE6		RPL13	BMP1
ADAMDEC1	DCUN1D5	SNAI3	ABCC8		IQCK		SLC1A3		LRRC14	TMEM119
DEF6	ACLY	CASP5	ZFP28		CYP2F1		IL18R1		ADNP	FBLN1
TAP1	HSP90AB1	PARVG	RPS4X		TEKT3		CYSLTR2		FLAD1	COL12A1
ZNF683	TMEM185B	FNBP1L	EPB41L4B		SPAG6		GIMAP2		KLC2	TCF4
APOL3	TBPL1	C1orf54	COPG2		LRRC4		CLEC7A		SLC39A13	NAV3
SP140	LYPD3	APOL4	KCTD18		OXTR		TBC1D4		ECSIT	CILP
IKZF3	CHEK2	PTK2B	SALL1		DZIP3		CTSO		AURKAIP1	OLFML3
SELL	MDM1	VENTX	GTPBP2		TTC25		GPR141		THYN1	VGLL3
BCL11B	PPP1R13B	C1QA	FREM2		TNNT3		SAMSN1		SLC25A42	SERPINE1
CCL4	COL21A1	SIRPB1	TMPRSS3		RYR3		CCL13		ARRDC1	CPXM2
GZMB	ABCA10	MAN2B1	SLC9A7		TP73		LAPTM5		SH3BGR	PRRX1
GRAP2	NLN	PVALB	ZNF662		LRRC23		OGFRL1		CCDC24	MMP13
SH2D2A	EME1	RTN1	CRTAP		DNAJA4		GPR137B		GADD45GIP1	MYH9
IL2RG	STEAP1	MMP19	SIRT4		DUSP19		FLI1		TUSC2	NETO1
P2RX5	AQP3	S100B	SUSD1				VSIG4		MBD6	KCND2
SLA2	CENPH	SLC2A6	FUT8				CLEC4G		ENTPD4	ECM2
PSMB9	FOXA2	PTPRO	SLC25A5				IL7R		BBX	TWSG1
PTGDR	CCDC34	ALOX5AP	KLK7				RASGEF1B		INPP5E	THBS1
MS4A1	ACTL6A	CSF1	CYS1				PLSCR1		COX5B	TIMP3
CD19	CAPN2	PTAFR	KLHL9				TLR4		SNRPD2	TNC
ARHGAP15	TCEA3	SECTM1	HMGCS2				ITGAL		LCAT	THY1
RUNX3	FEN1	CD207	C6orf141				TIAM1		SART1	SMO
KCNJ10	FYTTD1	HLA-DRA	PDK1				HCLS1		RPS14	ALDH1A3
ARRDC5	ZNF44	TMEM51	ATP8B2				XAF1		CLASP2	LGALS1
JAKMIP1	TMEM63A	CCDC69	KLF4				XCR1		ULK3	NKD2
PLCG2	CDK2	EVL	COX8C				SLCO2B1		JUP	NUDT11
KLRC4	ARNTL2	CD83	LTK				PLEKHA2		VAMP8	GREM1
TRAF3IP3	NUDCD1	PAPLN	TREM1				IFNAR2		NDUFS8	SLIT2
IRF1	TDRD10	SNCA	ARNTL				ETS1		TBC1D19	CCDC3
CD6	COMMD2	HAAO	EPHA7				CREBL2		ATP13A1	HTRA3
CAMK4	LMNB2	RIN3	SRRM2				GIMAP6		RPP25	NRP2
POU2AF1	CA3	VASH1	ZCCHC12				OSTM1		PAFAH1B3	GJA5
TBX21	HOXA11	ARRB2	FGF11				TRIM14		PDLIM5	SGCD
CXCL13	RCC2	TNF	BTF3L4				APOL6		ZNF517	GPC6
CST7	SPATS2	SLC7A7	NAALADL2				PLA2G7		TICAM1	SEMA3C
NELL2	CCT7	GPR68	SMAP1				EVI2A		ZFX	SSH1
TAPBP	RIC3	ARHGDIB	SLC22A15				OSTF1		ACTN4	FGFR1
APOL2	SPINK5	TNFRSF8	PROC				MEF2C		CTXN1	IGFBP5
TNFRSF9	PDCD10	HLA-DQA1	GALM				IQGAP2		MVK	SPON1
TCF7	RPS21	CD300C	PLAGL2				SIGLEC6		HDDC3	UNC5C
ITK	TBC1D7	CCL2	MT1L				CD53		PRKAR1B	ALDH1L2
IL15RA	GPR37L1	ABI3	SMAD6				CD84		MBNL1	CHN1
	PAK1IP1	MYO1G	RRAGD				MTA3		VAT1	ANGPTL2
	LRRK2	TMEM86A	FABP5				TGFBI		HSPBP1	SULF1
	CDS1	CMTM7	S100A6				GRIN3A		HIRA	FZD1
	SPC24	ADPRH	LIPE				APBB1IP		GLIS2	RGS4
	IGF2BP1	CD300A	WNT16				MPEG1		HHLA3	FNDC1
	ALDH2	TNFAIP8L2	ATP10A				LRRC8C		TUBG1	ADAMTS4
	NDUFS1	TYROBP	S100G				CMKLR1		LIMK1	COL1A2
	POLE	GNG10	TMPRSS4				NCF2		B3GALT6	COL5A1
	GABRQ	NCF1	FABP7				ITGA4		HRAS	PRICKLE1
	PLA2G1B	MAN1C1	RDH12				AP1S2		MRPL38	STON1
	CAMK2N2	BST1	S100A3				CD274		TMEM115	CORIN
	SKI	LRRC25	TBX1				RCSD1		FCHO2	PDGFC
	SPTLC3	CASP1	F11R				ARHGAP30		BNIP1	DPT
	MAGI1	CD4	TJP2				CLEC4D		ADSL	EDIL3
	SFXN1	TMEM176B	NPR3				DOCK11		MFSD5	ST6GALNAC5
	DBF4	FPR1	EYA4				CR1		ZNF76	LAYN
	LTV1	LRRK1	FGF20				ANKRD44		SPHK2	FBXL7
	CBX7	CCL3	CHAT				GIMAP1		XRCC1	PCDH18
	DIAPH3	KCNK13	SIRT1				IL2RA		LRP5	EHD3
	IFRD1	RASSF4	FUT4				EPB41L3		DDOST	TRAM2
	PLK1	GBGT1	RNF125				TLR8		LPP	TSPAN2
	LRRC31	PARVB	PON3				SNX10		CRTC2	GPR176
	LHX2	SIGLEC10	ODF2L				IL15		RPUSD2	PDZRN3
	SNX25	TRPV2	LPIN2				TNFSF13B		NUDT8	SVEP1
	SNRPD1	RIPK3	ASZ1				GPR155		PSMD3	MFGE8
	CFI	APOE	PIK3R3				TNS3		CCHCR1	DIXDC1
	DNAJC10	SEMA7A	TCF7L1				GLIPR1		RPL26L1	CD109
	TPPP	SOCS1	FHIT				CD86		ZNF655	PRKG1
	ANKRD27	IKBKE	GAD1				LY75		HECTD3	PMP22
	NASP	PIK3R5	TCTA				RASA3		RABGGTA	HSPG2
	PUS7	PLB1	GP2				CXCR4		POP5	FHL3
	TMEM69	PTGDS	SMOC1				HRH2		BLVRA	OLFML2B
	GTSE1	FCER1G	VDR				MS4A6A		BIN1	FSCN1
	POLE2	MRPL42	PCDHB14				MDFIC		TIMM10	COL10A1
	TRIM59	CD40	F2RL3				SH3BGRL		SGTA	PKD2
	SMC3	HLA-DOB	ACVR1C				GPR34		PTOV1	MFAP2
	KCNQ1	PLTP	ITIH2				GIMAP4		PGAP1	LAMB1
	C1orf61	CDX1	PLAG1				AOAH		PBX4	TMEM45A
	SLC26A5	ALOX5	LUZP2				SUCNR1		KHK	LRRC4C
	LRRC42	HMOX1	PRRX2				GNB4		PHB2	ANKH
	UTP15	MPP1	LRCH2				TBC1D2B		DPM2	ZNF423
	SULT1C2	C1S	APOBEC2				P2RY14		ATG4B	LOX
	ACTG1	LILRB3	ZNF616				SAMD9		DAPK3	ITGA5
	CDC5L	PLEKHO1	ACVR2B				LITAF		PIK3CA	ADAMTSL1
	UBAP2	RASGRP2	PTX3				CD44		USP11	DCN
	RFC3	LYSMD2	KIF21B				CERKL		SCNM1	SLC24A2
	RBPMS	LSP1	PCDHGB4				SGTB		COX7A2	ITGB5
	PPIL1	PTBP2	PRKX				CD226		STXBP3	PARVA
	ZNF608	MYD88	OBP2A				CORO1C		NDUFB7	C1QTNF3
	XRCC5	IGSF21	DMRT1				CSF2RB		UGCG	KERA
	PNMA1	SLAMF8	TRIM46				RGS18		ZNF264	UACA
	RHBG	UCHL5	TLR6				PRNP		PEPD	PALLD
	CAD	LYL1	MAT1A						NOC4L	SGIP1
	ACSM1	SLC2A9	MEPE						ZNF672	SERPINH1
	ZWINT	ST3GAL2	MYEOV						ZNF205	VCL
	PCCB	BCL2A1	RAB11FIP1						NGDN	GJC1
	DHFR	HLA-DPB1	IGFBP2						RARG	GAS7
	ACSL5	MFNG	DNAJB5						BYSL	MEIS1
	CCNF	GSTO1	SNRPN						LIG1	MAGEL2
	FAM111B	DNAJC5B	DYNC1I1						SCYL1	EDNRA
	DEPDC1B	SLC6A12	PROCR						SCAMP2	SPHK1
	HPS3	TNNI2	TMEM63C						TMEM33	NID2
	RBBP8	GAN	RAB33B						ARMC6	SH3PXD2A
	EPHA4	C1QC	DYNLL2						RHOT2	CALD1
	STIP1	CX3CR1	GAL3ST2						TRIM11	ADAMTS2
	RCOR2	PYCARD	FOXA3						CBLB	FMO1
	PSRC1	CSF2	SP110						GRK6	NAP1L3
	DAPK2	FOLR2	CNTFR						GIT1	NCAM2
	SLC44A4	MICAL1	FAM120C						DVL3	MICAL2
	ZNF239	GM2A	PCK1						RAI1	FKBP7
	NOSTRIN	PLCB2	THPO						ARHGEF10L	CLEC11A
	ZMAT1	FCN1	RPL32						TRMU	MXRA8
	XRCC2	NR1H3	F10						OXSM	JAM3
	HSF2	PKD2L1	C14orf39						TGFBR1	COL1A1
	CYP4Z1	GNAI2	ATP9B						HPS6	CSMD2
	PRAME	LILRB4	UBE2U						ABCA5	CACNA1C
	RNASEH2A	UNC13D	SNAPC3						CLOCK	DIO2
	RRM2	SIGLEC5	ITPR1						PARP4	XYLT1
	WDR12	RNF130	BTD						ATF5	PHLDB1
	ERGIC2	CBFA2T3	ABCB4						PLD3	ARHGAP28
	KIF3C	MARCO	ASF1A						AKT2	LEF1
	CLDN2	HLA-DRB5	AFAP1L2						GCDH	BOC
	RNF157	CD37	SNX7						CDK4	COL7A1
	FSD1	TRPM2	P2RX4						ARPC1B	TAGLN
	ECHDC2	POPDC2	WNT7A						ZBTB37	C1QTNF1
	AGPAT5	CLEC10A	RNF170						ZCCHC3	VEGFC
	USP54	CARD9	ATP2B4						GLI4	BNC2
	MUC1	ACP2	CCL28						SERTAD1	SEMA3D
	RTN4RL1	HIVEP3	CAPZA3						RARA	UNC5B
	YARS2	SLC2A5	ALG5						LHPP	CTSK
	DPF1	CAPG	ZNF75A						OPLAH	SEMA5A
	C12orf45	LY96	PIGZ						SNRPA	LATS2
	PGK1	ARL11	KATNAL1						SLC41A3	COL8A1
	PSMD11	RAB42	SP8						LRRC19	CPZ
	TMEM98	C5AR1	PITX1						TSTA3	CXCL12
	B4GALT6	GNA15	EFNB1						DEDD2	FLRT2
	ENC1	SLC25A19	RNF135						ZDHHC8	GPR1
	SLC34A2	CCL17	ALS2CL						SGSH	PLN
	COCH	DOK2	CTBS						OBSL1	HEG1
	LNX2	NTAN1	H19						ORMDL2	PDLIM7
	XPO5	HLA-DMB	INPP5B						SERF2	COL4A2
	ENPP5	CCL18	RIMBP2						NUDT22	PLAU
	FUCA1	RNF166	KCTD15						KCTD5	ENPP1
	NCAPG2	OSM	ADH4						ZNF707	ADAMTS5
	SHMT2	RHOG	IFIT5						AP4M1	ANTXR1
	TMEM14B	TNFAIP2	CYP7B1						PFDN2	TPM2
	TK1	SLC11A1	IFT52						DHRS7B	FILIP1L
	ZBTB16	IRF5	NRBP2						ARFGEF2	AEBP1
	MSI1	HLA-DOA	RRN3						VMO1	PI15
	MBIP	CTSB	ANK1						SLC25A36	ASPN
	NUP54	CD1D	SNORD36C						PARP10	CYP26A1
	CENPJ	GMCL1	ANXA2P3						TMED3	EFEMP2
	C17orf80	OLR1	CMTM4						ZNF12	TWIST1
	LMO3	MMP9	TSPAN5						FAM91A1	ITGA11
	TBRG4	RGS10	HSPA5						FAAH	HAS2
	C1orf210	TCN2	CDC25B						ARL3	DZIP1
	MGLL	PPP2R2B	MPZ						FBXL19	SCT
	CBS	MYBPC2	GNAO1						NDUFA11	TM6SF2
	GTF2IRD2	GPBAR1	ZNF684						SLC35A2	LRRC17
	LPAL2	MICB	TFCP2L1						FRG1	ZNF469
	STRAP	IFI30	HIGD1A						RASAL2	SSPN
	MINPP1	CCL22	CEP70						SH3D19	ZNF521
	FGF12	CLEC4F	DPY19L1						ZBTB17	GJA1
	RAB3B	C1QB	TRIM7						RPS19BP1	MMP16
	ASPM	ACP5	PLK2						DHX34	APBB2
	KIAA0319L	CD52	AKR1B10						PLXNA1	ENTPD1
	SERPINB5	HK3	MYO5B						ST14	PDPN
	PRIM1	TREM2	C1QL3						CNKSR1	POSTN
	SYNJ2		PTPRZ1						REEP4	RAB23
	DISP1		ANP32C						TRAF7	RNF152
	NUP35		LEAP2						ITGB1BP1	ROR2
	MYO5C		PCDHGA10						PHKG2	SERPINE2
	CDC20		TSPAN8						ATP13A2	MMP1
	CCT6A		CTNNAL1						ZNF267	ROBO1
	EDA2R		TRIM71						PSMC3	HAS1
	MCM6		TSEN2						BAIAP2	MSC
	MCM7		ANKRD6						ADCK5	SYDE1
	TRAIP		GNAI1						CRELD2	COL13A1
	KIF4A		MLC1						UXT	LMOD1
	ZYG11A		DSC3						CSPP1	THBS2
	NOLC1		BMP8B						MAST3	RPLP0P2
	PGM2		STIM1						SLC16A13	CD99
	TACC3		TNS4						SMARCB1	TWIST2
	PANX1		BRD1						PIK3C3	FHOD3
	GAS2L3		EIF4A1						HSD17B8	NOX4
	SELENBP1		PI3						RPLP1	MCEE
	POLD2		OS9						CIC	TNN
	IGF2BP3		ADRB1						CLDN7	GUCA1A
	CYP4Z2P		MSX2						ZNRF1
	PRPS1		ALKBH8						YIF1B
	PRR11		CLSTN1						TSEN34
	TTF2		ERBB3						SP1
	HOMER1		RARB						ATP11C
	DDAH1		FAM81A						CYBA
	ZNF695		TGM1						CHMP4B
	BTBD9		ZNF585A						ISYNA1
	PBXIP1		IGSF10						PELI3
	PLEK2		SOX2						MIF4GD
	BNIPL		PHC1						SIRT7
	EEF1E1		UNC13C						MXD4
	CMAS		POLR2J3						GALK1
	PA2G4		SCRN1						MPND
	VAMP2		TBX18						COMT
	C8orf34		DDX3Y						AMDHD2
	PLK4		CGREF1						TMEM88
	CKAP4		DMRTA2						STAG1
	IL23A		B3GNT3						SLC25A4
	C15orf48		TRIM55						TRIOBP
	NEIL3		MPL						S100A13
	RANBP1		RHOF						TAF6L
	ZNF639		DGKI						DNAJC14
	PDCL3		RBP7						PHLDA3
	SPATA6		NTSR1						GPS1
	MKI67		TMEM64						HYAL3
	GALNT11		KCNH6						SLC35C1
	ZFP2		RPL37						CUL7
	CDC25C		TH						TXNRD2
	NTN4		ENO3						AAMP
	ST3GAL5		GRHL3						TMEM123
	MAD2L1		NPPC						COL18A1
	XYLB		EPB41L5						ETNK1
	GAPDH		PRSS22						ITPR2
	ESPL1		HPN						DVL2
	PRKAB1		HLA-DPB2						SNRPD3
	FIGN		HTR3A						SLC6A9
	KREMEN2		ANXA1						LMNA
	PPAT		SGPP1						CYB5D2
	HELLS		UCN2						YIPF2
	DONSON		MAGEE2						PPP1R14A
	GRIN2D		SLC8A2						HPS1
	SHE		ENTPD8						GMEB2
	XPOT		UGT3A1						ALDH4A1
	FIGNL1		CARD6						ZDHHC18
	POP1		IL11RA						PUS1
	PHKB		LCT						SSNA1
	CDC7		SETDB1						DST
	USP14		DPPA2						DPM3
	BLM		KCTD7						NENF
	CCNE1		SPRR2E						ARID5B
	IVD		FGL1						PPP1CA
	SMC4		CYP39A1						NFIB
	STYK1		ABR						ZNF493
	MYBL2		CATSPER1						MPG
	MTUS1		ATP2A2						HINT2
	POLR2K		FXYD4						GPX1
	ALOX15B		WFDC5						APBB3
	EIF4EBP1		MAPK8IP1						GEMIN6
	NICN1		CA10						IGSF8
	SRPK1		CST6						GEMIN4
	UBL3		BLZF1						ZNF154
	STEAP4		JAKMIP2						RAB11FIP2
	CDH24		SORL1						NUDT17
	ASNS		QDPR						DOCK4
	BVES		LGR4						BCAP31
	ATOH8		LYPD5						GSTP1
	NEIL1		SMAD3						ZNF524
	STAT6		NDN						NR1H2
	CLGN		CARD14						GNPTG
	CKS2		MTMR7						TCF3
	CHCHD2		PLA2G4A						DHPS
	KIF2C		SLC19A2						PPARD
	FMO4		NFATC4						SMARCD2
	LSG1		SOCS6						ZNF276
	ARTN		TDRD5						ING4
	NEDD9		DEFB126						CORO1B
	PER1		DSG3						LCOR
	WDR53		C3orf52						PHC3
	WSB2		TAF4B						POLD4
	CEP72		RLN3						CLIC4
	LSM11		SARM1						UCN
	LRRC59		HS6ST3						PHF23
	NUP205		SLC6A8						RPUSD1
	RFC4		CHMP4C						ABHD8
	MRPL15		TBX6						PELP1
	PTDSS1		NRP1						SDF2L1
	PPP2R5A		MAGEA4						RAB25
	SCNN1B		XPNPEP2						PLEKHA3
	KCNK5		SLC33A1						CD81
	RAD54B		HRH1						HMBOX1
	CCNA2		DDX58						C19orf48
	FGFR3		SNX22						LSM7
	UHRF1		ACOX3						RPS6KB2
	MAOA		PPP2R3C						CDC42EP5
	SUV39H2		SPESP1						PACS1
	CHAF1B		IL20RA						SDSL
	POLA1		WNT5B						ATN1
	TRIP13		PPM1L						CLDN3
	OCLN		MTHFR						SARS2
	ARL9		TDRD1						LSM10
	MTHFD2		TUBB8						HMOX2
	SLC25A13		SMPX						SPR
	PIGR		FAM90A1						ACD
	DTYMK		CP						REXO4
	TRIB3		TFAP2E						RPS15
	PGC		TMEM80						RFNG
	CPT1C		RPIA						NFKB2
	RHPN2		LY6E						GPC1
	CSE1L		MYBPC1						CLDN4
	TMEM87A		KLK12						POLR2J
	HMGA2		PVR						SCRIB
	E2F8		LHFPL5						D2HGDH
	E2F2		TM4SF4						BCL3
	VRK2		SLC25A24						MAP1LC3A
	TMEM132A		PTER						SLC9A1
	KIF11		GAB2						HSF4
	COL4A4		CRADD						DIP2B
	DUSP14		ZHX2						SFXN4
	ATP13A4		L3MBTL4						CPNE2
	C1QL4		NUDT12						POLRMT
	PSMD14		GDA						ARHGAP5
	JARID2		ADH1A						ATF2
	CEACAM6		KCNJ1						LRRC45
	EXO1		F3						SORBS3
	RECQL4		FAM3B						FADS3
	NAPSA		AADAC						ARMC7
	RUVBL1		CPD						REEP6
	ADRA2A		MAGEA12						PIN4
	SMARCA2		SLC4A11						SLC25A35
	EZH2		ZNF713						ZNF467
	SCP2		PIGK						PRPF31
	RORC		LAMC1						MRPS18A
	RPS27L		RNF183						TFEB
	BFAR		ANKRD22						SLC25A45
	CEP76		ACTA1						FEM1B
	GGT6		C18orf21						SCNN1D
	FANCB		POLG2						THAP7
	ACOXL		CAMK1D						MRPL51
	MAST1		JDP2						PDK2
	KLHL7		KRT4						POLR2L
	IRX3		CRYZ						IFRD2
	RASGRF1		DHRS2						RB1
	RGN		BPNT1						PNPLA2
	DUSP1		CYP11A1						PRKD3
	ALPL		SERTAD4						SAMD12
	CDH18		HOXB13						GUK1
	C1orf198		GPM6A						CBLC
	STMN1		CACNA1H						NMB
	MRPS30		FMR1						MRM1
	SLC5A6		PCBD2						CASP9
	ACSM3		MAGEA1						TLE3
	SLC26A9		CACNA1B						EDEM1
	SLC3A2		LY6G6C						KCTD11
	ILF2		HPX						WDR74
	PGAM5		GRHL1						HSCB
	DTL		MSMB						ABCC10
	ADA		B3GNT6						PIP5KL1
	TOPBP1		PLA1A						TBC1D22A
	PSMC3IP		DMRTC2						GSTM4
	UBE2C		GEMIN5						TTC14
	EIF5A2		ZNF266						KCNJ13
	MARS2		GABRG2						AHSA1
	CDCA5		ADAM22						TOR1AIP2
	CACNA2D2		RPS15A						QPCTL
	DERA		NTNG1						ZBTB20
	INA		IFI44						QSER1
	PACSIN1		CETN3						EME2
	MRPL19		PNMT						KLHDC4
	MARCKSL1		IVL						TBC1D10A
	C1orf74		CXCL14						STAP2
	GSTCD		ZFP42						FAM50A
	LIMD1		GSC						EML3
	TIMM8A		CCDC47						ANKRD10
	ADM		IFT74						HAX1
	C12orf4		GALNT12						AKR7A2
	ZNF93		ZIC3						RNF31
	DOK4		TNFRSF10C						ZFP64
	ZNF525		BAG1						CUTA
	CDCA4		SEMA4B						GPR18
	CTSH		DPYSL5						PAQR4
	FLRT3		CHRDL2						ABCF3
	CEP250		PCDHGB5						CCNT1
	PYGL		ALKBH3						ARL5A
	CACYBP		UAP1						BAK1
	KPNA2		CKM						SPINT4
	RRM2B		CDKN1A						CINP
	ARL6IP1		SCGB2A2						ANKRD50
	PNMA2		SLC2A4						PNRC1
	BRCA1		SYT3						MGAT2
	VANGL1		TMSB4Y						MDH2
	SLC25A40		CORO6						C21orf91
	PSMD2		RAB40B						PEX11G
	KIF13A		MAL						EGFL7
	AMT		ANGPTL4						HAGH
	ABO		MCOLN3						PLXNA3
	CD55		CHST2						TOLLIP
	CCDC15		KBTBD6						TCEA2
	COL4A3		MTRR						MGAT4B
	SMC2		HES2						NDUFB3
	MELK		CAPN12						DVL1
	DCLRE1A		KRT33A						GALNS
	GCLM		TBC1D8						GAS2L1
	SYNE1		PEBP1						MAPK8IP3
	NUDT19		ZNF541						MBNL2
	HAS3		FASTKD3						LSM2
	FOXD3		ZNF354C						OSBPL7
	NETO2		NAP1L2						DNAJC4
	CGNL1		SLC1A7						GPSM1
	RIMS2		SYT7						SYTL1
	ABCC3		OSBPL2						AKT3
	FOXM1		CSF3R						ACOT7
	CHCHD3		AKR7A3						SP4
	AURKA		WFDC12						CCDC9
	CDK5R1		ADCY6						TLE6
	IRX1		FGB						BBC3
	TYMS		SCG3						ZNF212
	PFKFB4		TMEM44						SLFN5
	LRRC36		DCUN1D3						PLCB3
	EIF2S1		PSORS1C2						TSNARE1
	NISCH		ZNF613						EHD1
	SYNGR4		NTNG2						NDUFA13
	CCT2		NBEA						NAGPA
	HMMR		PPWD1						FNDC3A
	ZFP36L1		FAIM2						AKAP8L
	MRPS25		BCL9						LRCH4
	GPR158		CRABP2						RRS1
	SCNN1G		BMP5						LDHD
	TROAP		SLC6A20						SLC22A18
	MGAT5B		TMC7						ZNF691
	FANCD2		COQ7						IER2
	ANAPC7		SLC31A1						MRPL24
	DDX10		RASSF3						SEMA4C
	ECT2		TIPARP						CMTM6
	MPP2		MAGEE1						ZNF721
	HSD17B6		RLN2						POLD1
	BRD9		CLCN3						SLC30A1
	GNL3		CYP2C18						LENG1
	TFDP1		HES5						TMOD3
	MEST		CYP4F8						ZNF414
	PRKCE		OSBP2						TRPS1
	NUP155		CXCL2						ZNF341
	PRDM16		LY6K						SURF1
	TMEM117		KDELR2						MXD3
	PLXNA2		CEACAM8						TTC7A
	SLC12A8		XG						SNRPB
	DBF4B		EIF1AY						BATF
	FASTKD2		MGAT4A						MBNL3
	SH3BGRL2		SLCO5A1						IKBKG
	IRX5		ZNF558						ANKRD13B
	MLYCD		GKAP1						SRM
	SH2D5		MTNR1A						CIB1
	TPI1		ALDH1A1						CCDC7
	XPC		TMEM63B						SNTA1
	SEC61G		CRISP3						TM2D2
	HMGN3		DPYS						HCN3
	PAICS		SPINK6						TIMM44
	RAD51AP1		STOX2						SBNO1
	VRK1		SLC2A13						AXIN1
	ZNF367		PCDH8						SSR4
	CDKN2C		RAB6B						GNG12
	CD3EAP		HRC						PIAS4
	MOAP1		DOCK3						PARS2
	E2F7		GUCA1B						MAN1B1
	CENPO		TBL1X						CHAC1
	TSC22D3		KRT40						PXN
	NOD1		SEMA4G						THTPA
	DLC1		ZIC2						ZNF511
	UMPS		PLCB1						HMBS
	CDKN3		PRKCG						G6PC3
	CHAF1A		SCUBE2						FES
	PRTFDC1		SCAMP5						PQBP1
	AXIN2		TMEM70						BCAM
	CDT1		PLA2G2F						SERINC1
	TRIM37		HSD11B2						SLC19A1
	TDP1		LYPD1						HS6ST1
	PTTG1		DNER						CTSD
	YBX2		UPK3A						GPAA1
	ARHGAP11A		ARF4						CD276
	LRP2BP		UPK3B						FBXL6
	GPC4		NUP188						JMY
	GLDC		TBX10						CPSF4
	TTC19		PRKD1						TMEM75
	GPR160		KCNH8						UBR1
	LSM12		KCNQ3						DMWD
	NPC2		PRLR						ATG4D
	TCF19		RNF148						BAX
	ENPP4		CCNL1						GSS
	RAD51		SULT2B1						TRAP1
	TUBD1		GNGT1						BCKDHA
	CCNB2		C8A						MCRS1
	KNTC1		LRRCC1						BCR
	PIF1		IMMP1L						CALR
	LMO7		CFH						NME1
	CHIA		UTS2						C12orf57
	RNF180		MLLT6						ZBTB11
	C4BPA		NGRN						CAPNS1
	AGMAT		KRTAP5-1						IER5L
	KIF23		SEC61A2						ZNF526
	GMPS		UPK1A						TMEM9
	HABP2		DPEP3						CCDC6
	TERT		ZNF30						UROD
	SLC22A3		TTR						ZDHHC1
	YKT6		CGA						ANKRD9
	HOXD1		NR1I2						DTX3
	DLD		CROT						TMEM186
	SSBP2		CHST7						VPS18
	CCNE2		KRT13						RDH13
	SMS		SLC6A2						NUDT2
	IPPK		UNC5A						GYS1
	ERH		ASRGL1						NT5C
	NUSAP1		EDAR						PHLDB3
	POLR3G		POLR3H						MAP4K3
	GPRASP1		SLC22A5						PARP8
	CDKL2		CYP2W1						PPP2R3B
	DPP4		KIF25						PALM
	YEATS4		SALL2						EBP
	PHYHD1		MPP3						CHST12
	ERBB4		RERG						BRMS1
	GALNT10		TCF7L2						DNAJB2
	ATP11A		MAP7						SYMPK
	SIAH2		TMEM17						TBC1D17
	RBM6		SETBP1						PDZD8
	LAMP3		TMEM30B						DGKH
	SKP2		N4BP3						MRPS2
	DBN1		SEMA5B						NUBP1
	MEGF9		HOXA4						GTPBP3
	GANC		EBF3						FBXL8
	PRRT1		WDR5B						TOMM40L
	SCGB3A2		PCTP						FTSJ3
	MT1H		SCCPDH						PKP3
	ATAD2		SLC9A2						MED19
	NCALD		OFD1						ARHGEF5
	KLHL20		AP3B2						WDR6
	APEX1		ALDH8A1						QTRT1
	HSPD1		SNAP25						DENND1B
	FUCA2		GREB1						MLF2
	LRP8		DACH2						TMEM39B
	CYP4B1		KCNAB3						RPL35
	PMAIP1		HAPLN1						RB1CC1
	TMEM38B		CACNB2						FBXO46
	TXNDC11		GLTP						FPGS
	DCK		RPL22						GADD45G
	HSD17B4		CYP3A4						ZBTB41
	ID4		ZDHHC11						PSMD13
	LIN28B		LIPK						MALAT1
	ATP1A1		VWCE						EPN3
	ACADSB		CAPN9						GUSB
	DARS2		FTHL17						ZNHIT2
	ESCO2		ZNF85						SCAMP4
	RHEBL1		LAPTM4A						VPS37D
	DNMT1		CAPN5						ZNF121
	ALDH5A1		THUMPD3						MEN1
	FRMD5		KCNV1						SIL1
	CKAP2		LRG1						NANS
	CDCA8		ARRDC4						KCTD13
	GOLPH3L		SLCO4A1						ZSWIM4
	EPS8		ZNF681						PPIH
	FOLR1		IFT81						MAGOH
	MSH6		PGBD5						CLDN15
	CDCA7		NLGN4X						HES4
	LMNB1		MTMR11						OXR1
	PSPH		CMTM8						KIAA1522
	ZNF131		SEMA3B						AP2A1
	IFT57		AVPI1						MRPL11
	CFTR		GARNL3						COX7B
	CLSPN		DPPA5						PRKAA1
	ACBD7		FGF19						MON2
	DPYSL2		LAMP2						FCHO1
	RAD21		ENTPD7						NUMBL
	INHBE		HCN2						RGL3
	RBM5		NOX1						MRPS15
	VBP1		RP2						SLC26A6
	STARD3NL		VEGFA						PRDX5
	PRICKLE2		PKHD1						DECR2
	ISL2		CYP2U1						SNX13
	TEPP		TNNT2						EXOSC5
	FOS		SLCO1B3						PCBP4
	GPRC5A		LRRTM1						NFKBIB
	MRPL1		INTU						NOXA1
	SENP2		CES3						ZNHIT1
	CYFIP2		GPRC5D						GNB1L
	ANKRD7		FXYD3						PPIB
	MRPL13		CSTF2T						STK32C
	VDAC3		ST3GAL1						MRPL28
	ZNF704		ZNF607						TMEM54
	TEX15		SLN						SLC39A7
	C1QL1		TNFAIP8L3						NRAS
	LHFPL3		KRCC1						PLEKHF1
	CNIH2		INSM1						B3GALT4
	HOXD11		SPINK4						ELOF1
	GAL		FBXL16						GPR137
	SCN1A		GATM						MTMR6
	HDGF		AMD1						AGRN
	PXMP4		SLC5A12						ARMCX6
	EGLN3		NFXL1						ELF1
	YBX1		PPM1H						TSFM
	B3GALNT1		CCDC121						RAB11B
	FAM83F		UQCRC2						MBTD1
	GTPBP4		QRICH2						PRRG2
	CYP4V2		INSR						MYL5
	KIFC1		GAST						ZNF141
	TAF2		ACAT1						SLC39A3
	GLMN		LRRC3						TRMT1
	RBMS3		GPAM						DYRK1B
	STXBP1		PEX19						TRUB2
	EGR1		PCSK1N						SHOC2
	RBL2		AQP7P1						SREBF1
	NUF2		KALRN						C1QBP
	RNASE1		MTMR12						RPL36
	PCDH20		CSPG5						SENP5
	ERN2		ZNF615						HPCAL1
	TFRC		INSIG1						IRF3
	SLC16A1		NDRG2						SMUG1
	CHD7		MYO7B						SEL1L
	MMP28		NSUN7						SLC25A10
	SHOX2		NPTXR						TAF6
	CEP55		RFK						PNKD
	ZRANB1		GULP1						RSBN1L
	PPP1R3G		CUBN						ZBTB7B
	MASTL		GALR2						GPS2
	SPRY2		TAS1R1						TBL3
	PRODH		SPINK9						CDC42BPG
	DEK		RAD1						HIRIP3
	GNG7		SLC6A11						CCS
	SLC35A1		AP1S3						PHF5A
	TIMM9		ZNF211						LLGL2
	PRDX3		CCDC110						PLAC4
	AQP7		PLCH2						RHOD
	BUB1		RAPGEF4						RPL27A
	KIF1A		RGL2						ELOVL1
	PLCH1		TIA1						PRKD2
	PDSS1		GPX2						CRIP2
	CCDC43		PCDHGB3						DOCK6
	NR3C2		PDE6B						EPS8L2
	DNAJC9		CBX6						PMM1
	EPB41L4A		CLCNKA						WDR81
	FANCC		XIST						PRMT1
	UBE2T		MYC						MAP3K1
	SNAPC1		DHTKD1						PEX5
	MCM8		TRIM9						MPST
	SPC25		MAP3K8						ZMAT5
	TFR2		PTP4A1						PLEKHH3
	CENPI		SOX15						ADRM1
	RBL1		MCCC1						RNF167
	RHOBTB2		LGR6						CPSF6
	PSMA6		APBB1						FLOT2
	SHROOM4		GPT2						MED25
	EIF5B		DCBLD1						ZNF562
	KLHDC7A		FBXW10						ARL5B
	PTPRE		GAS5						TBC1D10B
	DSC2		RNF175						DPH2
	GPI		MAMDC4						C1orf53
	NRM		MAP2K6						PSMC4
	GGH		GPRC5B						RHPN1
	KIAA0513		AKAP5						ANKRD28
	KIF20A		ZNF354B						SPCS3
	CLPB		SH3BP5						ISG15
	NIP7		NAT1						TMF1
	POLR3F		ATG10						RORA
	SHCBP1		TES						CLCN2
	POLR1A		RAP1B						ARVCF
	MCM10		MMP7						SIPA1L3
	HPRT1		GSTM2						B4GALT2
	TXNDC9		PLA2G3						AP1S1
	PTPRU		CLDN11						RPL18
	ARHGEF17		BHLHB9						UNC119
	PPME1		MOV10L1						TM7SF2
	CLTCL1		CPNE4						PCK2
	RTTN		EVC2						TP53I13
	SUSD2		CNDP1						ABCD1
	RRM1		RPL37A						HECA
	WDHD1		UBE2Q2						CA1
	WDR76		ZNF560						SLC25A23
	STK32A		TMTC2						KRT8
	SORCS2		TUSC3						MRPL34
	TPT1		IARS2						MORC3
	ITGA9		NOS1AP						TOM1
	MTBP		ZNF675						TRPM4
	CYP4X1		GJB7						ATXN7L2
	NXPH4		LAMB2						SCAP
	CALCOCO1		S100A7						TMEM53
	EXOSC3		TULP3						PANK4
	SLC4A4		CECR2						SKIL
	UCK2		TSPAN12						HMG20B
	HSP90AA1		GUF1						NINJ1
	SET		GPRC5C						CITED4
	B3GNT5		RCN2						DTX2
	PTMA		SLC16A4						C6orf136
	ATF1		HDAC4						LMTK3
	GNG4		ZNF561						MAD2L2
	BARD1		ASCL2						PPP5C
	CST5		ZBTB40						SYVN1
	HIP1		TMEM107						IDUA
	KCNJ15		SNN						DDA1
	SPRY4		ARC						HDHD3
	SCTR		TEC						LSM3
	EXOSC2		ZFP3						MTDH
	MRPS17		LONRF1						RBM39
	KLF15		HGD						EXOSC4
	CDC25A		PRDM8						JUNB
	STOML2		ZNF337						ASPSCR1
	PRMT5		MUC12						MRPS21
	IQGAP3		EFNB3						NUBP2
	C12orf29		SGPP2						ECHS1
	SSRP1		PHOX2B						POLE4
	MPHOSPH9		SH3BP4						SLC2A4RG
	UPF3B		ZP2						PPP1R12C
	ALDH6A1		FRAT1						POLDIP2
	KIF14		SLFN11						GMPPB
	CD59		AKR1C4						CDK10
	AQP5		NT5C1A						TMEM79
	SEMA4A		SNHG8						IRF2BP1
	MAPK10		SH3BP2						MRPL49
	YWHAG		HERPUD1						UCKL1
	ZWILCH		GALNT2						ACO2
	IL17RD		DTX4						DDX27
	GNA14		XKR9						MVD
	FYCO1		PARP11						DDX49
	UBA2		OPRL1						CHCHD6
	SLC15A2		FKBP5						NAT9
	NUP107		L1CAM						TMEM42
	ACYP1		SYTL3						IQSEC2
	COMMD8		KRT14						DBP
	SHH		CNTN6						ZC3H6
	EIF2S2		EPHB1						ZNF628
	CDKAL1		NOTUM						TBC1D9B
	SNX6		MAFA						SETD1A
	GPD1L		RHOBTB3						RHBDL1
	C1orf21		MYO1E						ZNF696
	CCPG1		AEBP2						ZNF232
	PLOD2		SOST						PCYT2
	ATP6V0A1		SLC2A3						TBL2
	SRGAP1		ZNF471						ZDHHC17
	PHF19		EPS8L3						RABEP2
	AUTS2		ASB4						SLC25A1
	PDK3		ABHD1						DR1
	TMEM43		SYPL2						CHTF18
	ZNF441		GLUL						RPS9
	HLF		CGRRF1						RALGPS2
	C5orf34		PLXND1						PBOV1
	YEATS2		GOLGA8B						SLC25A22
	SNED1		EGR3						ZNF444
	SSTR2		CNTN3						AIP
	REEP2		TESC						IDH3G
	ELOVL4		PLAT						C19orf25
	EHBP1		HTR2C						RPL8
	BRI3BP		HORMAD1						CLPTM1
	BMP3		N6AMT1						FBXW7
	ACSS1		C3orf38						ILK
	MCM2		S100A4						ERAL1
	PITPNM3		PCDHA11						NOL6
	TAF9		OPRD1						LLGL1
	DNAJA1		HSPA2						HEMK1
	KIF18A		SBK1						WDR24
	ARSD		PDLIM1						COQ5
	MSH2		UGT2B4						VPS28
	FRY		OTUD6B						ZNF91
	RNF2		PPP1R3F						AK1
	OR2B6		BAAT						TMEM102
	DCLRE1B		FKBP14						GCAT
	SEH1L		ZNF195						NPM3
	UCHL3		LHX8						RBM33
	PTGES3		B4GALT5						ELMO3
	ADHFE1		NPR2						KLHL17
	LRP12		DYNLT3						BCORL1
	PGBD1		INE1						ZNF34
	EPHX1		CD47						TBKBP1
	ZFP36		KCNT1						COX4I1
	RSRC1		PRL						LDLRAP1
	GPC2		MATN2						A4GALT
	HNMT		DLX5						NDUFAF1
	PTPN13		PITPNM2						GDAP2
	SUV39H1		SLC9A5						PRR5
	DNMT3B		ABCA4						UBE2O
	TMPO		IL4R						LSM4
	RFC2		RCBTB1						GDPD5
	BCL2L10		PDE3A						RAVER1
	TUBB		MGAT5						ARMC5
	CACNA1D		GATA6						MRPL14
	MND1		ZNF670						RAB13
	TAF1A		HSPB8						CYB5R3
	HSF2BP		RAB20						ARSA
	USP1		DTNB						CABLES2
	TXNIP		NNMT						ZMYM1
	DAAM2		POLR2A						RAMP1
	SLC16A11		ASB9						PSD
	LMBRD1		NAGS						SUOX
	CBX2		CX3CL1						NR3C1
	ZNF552		STARD4						ABHD12
	MRPL47		MUC5B						RABGAP1L
	HYLS1		CFDP1						ZBTB38
	TNFSF15		FZD6						NR1D1
	MT1G		ANKRD35						ZHX1
	OIP5		ZNF256						ASB13
	GRPEL1		RIPK2						EEA1
	CYB5A		RND3						SH3GL1
	SESN3		MGST1						ARHGEF18
	ZBTB39		ELOVL3						TRPM7
	KIAA1671		RPS12						ITGAV
	PSAT1		HNF4G						ZNF680
	RAB3IP		ZNF547						USP5
	TWISTNB		AFP						RTKN
	TMPRSS2		MB						LMBRD2
	ARMCX4		RPL31						RNF113A
	LIN9		KCNJ8						CHPF
	SLC38A1		IRX6						MRPL36
	CHD9		PTPRN2						PIGQ
	SLC25A21		ATP1A3						ZNF687
	PDIA4		DNHD1						STX10
	FADS2		XPR1						ANGPTL3
	PPP1R12B		PIP5K1A						SLC9A3R2
	SNRPF		ZNF287						SMG5
	CENPM		TMBIM1						C3orf18
	IL1R2		SLITRK4						TMEM18
	ANKRD29		FDX1						HTRA2
	TMSB10		ADORA1						CLSTN3
	RBBP7		ST3GAL4						C19orf33
	LSM5		ACVR1B						DNM2
	TCP1		RHOBTB1						TIGD5
	FBXO5		PRH2						CBX8
	DNAJC6		PCCA						SPINT2
	ELOVL7		IL17RE						CHMP2A
	CPAMD8		DUSP9						PCBD1
	CCL26		ANP32B						NDUFS6
	PCNA		TRIM61						SERINC5
	APOBEC3B		ARSG						STYXL1
	MCM4		ZNF281						ABCB8
	PHACTR1		DPY19L2						GPKOW
	MLLT11		NMNAT1						COPE
	GPR63		SLC12A2						ACADS
	PER3		ZNF383						SUPT5H
	KIF15		ACACB						TXN2
	SIAE		CACNA1I						MAP2K3
	L2HGDH		PSG4						RBM10
	SNX30		TRAFD1						HDAC5
	SLC7A5		BMP4						ASMTL
	C9orf40		PRSS3						SNX8
	C15orf41		SLC4A3						TOMM22
	SV2A		TUBB2A						BCAR1
	PRC1		RELN						DDX54
	C11orf54		MRPS28						MUTYH
	APLP2		POF1B						STARD3
	CEBPG		FOXQ1						GALE
	REPS2		SDCCAG8						NDUFC2
	ECHDC1		LPL						SFPQ
	DUS4L		HES1						ATXN7
	HMGA1		ENAM						MGMT
	ABCC6		HDDC2						CYHR1
	GTF2H3		ORMDL3						PNPLA4
	NUDT15		PRIMA1						IL17RC
	IL6R		ISCA2						CBY1
	BIRC5		SAGE1						TTC17
	SLC35E3		TTTY14						AHCY
	HOXD13		COG5						ZMYND19
	UNC13B		NSUN6						CHERP
	GTPBP8		CA6						WDR13
	TNS1		KYNU						TSSC4
	MDC1		TMPRSS6						OGFR
	FOSL1		MSLN						RELA
	MMD		GPR27						NR1D2
	C17orf58		CITED1						JUND
	AGR3		COL9A1						DLEU1
	DPM1		SSX5						GUCY1A2
	MCM3		RBP4						TEAD3
	RMI1		TSHR						RTN4R
	DAPK1		CLCN1						NEU1
	RAB27A		LYSMD1						ALG14
	ANP32E		CEP68						HIGD2A
	FADS1		CYP4F3						REXO1
	VSIG2		ZCRB1						ATP6V0C
	KLHDC1		FZD9						STOML1
	MYBPHL		CACNA1F						DDX17
	SLC39A14		TRIM45						SMPDL3B
	C1orf112		TCEAL5						ARHGEF19
	PAM		SLC6A3						HCFC1R1
	IRX2		FSIP2						PLEKHJ1
	MCM5		CYP4F12						RBM41
	OPHN1		DIRAS2						B4GALT7
	NRIP2		MT3						SLC35B2
	CRY2		FUT10						SURF2
	CHAC2		P4HA2						TEX264
	ABCA3		AQP1						CAPN1
	WASF1		ANKRD37						AP2S1
	RAE1		SLC16A7						ATP6V1F
	PIGW		SOX14						NDUFA9
	CDCA3		MBD4						ARHGAP27
	UBE2S		PAX9						ALKBH2
	FAM8A1		SLC25A25						GTF2H5
	PGAM1		GRIK2						ERF
	SYT1		HINT1						PSMD9
	MTHFD1L		SYTL5						RAB24
	SASS6		F7						EMG1
	NUDT16		PDHA1						TBC1D23
	CCNJ		ATP7B						TMEM25
	DMC1		NPC1						STRN3
	CCT3		ZNF257						NTHL1
	PSMD7		GLCCI1						CASKIN2
	RFWD3		STXBP6						C8orf58
	SUSD4		ZADH2						LRCH3
	CTSE		INHA						YOD1
	GMNN		SPAG4						COQ9
	E2F1		MSX1						SCARB2
	GTF3C4		ATP7A						DOK1
	TMEM106C		CAB39L						DNASE1L1
	CLU		SLC5A8						PARP3
	ARPC3		GABRB3						SLC27A5
	PFDN4		CYP51A1						THAP8
	CHAD		LRAT						KPTN
	C1orf116		PAFAH2						C9orf72
	ZDHHC7		CHI3L2						PACSIN3
	CABLES1		ZNF585B						ABHD14B
	MYLIP		RBKS						RPL13A
	MTHFD1		LEMD1						DUSP8
	UNG		ABLIM1						TBCD
	E2F3		TMEM154						EPS8L1
	ASAH1		ACADM						KHSRP
	SLC25A15		CRABP1						DHRS1
	SLC5A9		FBXL13						MANEA
	CAT		MST1						CLIC3
	PLAC1		PTPRN						FLOT1
	PFKP		PDZD3						MINK1
	AURKB		SLC16A10						BRAF
	CSRP2		DNAJB13						FRK
	HPGD		ZNF138						RPS28
	BTG2		PFN4						KLHL26
	QRSL1		NEDD4						GRB7
	ARL6IP6		PTPRR						PEX14
	PPP1R1B		ZNF419						MAZ
	ARPC1A		GLS2						ENDOG
	SFTPA1		RAB6A						CHCHD5
	CALU		TAF4						TFPT
	TMLHE		CHST3						ACBD4
	CKS1B		SMARCA1						SHPRH
	CCDC58		SCUBE3						LPIN3
	LETM1		TTYH1						INTS1
	KIF24		CDKN1C						STAU2
	TSC22D1		GRIN1						KRT18
	RNASEL		PPARGC1A						NCKIPSD
	CCNB1		PLEKHF2						NDUFS2
	ITM2B		PLEKHA6						UBQLN4
	TXNRD1		PCM1						PRSS8
	CIB2		POP4						MEGF8
	GJB1		DMAP1						THAP4
	NUP37		NFKBIZ						DUS3L
	ACTB		WDFY2						MAPK11
	NUP153		CRYL1						JOSD2
	CKAP5		DNAJC1						LMBR1
	SFTPB		FZD5						PTDSS2
	IGSF9B		ZNF630						TCIRG1
	MR1		REG4						MAN2C1
	ADIPOR2		SYT17						GFER
	BUB1B		FBXO25						NIT1
	CITED2		ANPEP						DLEU2
	ADCY9		DHCR24						CAMTA2
	FGFR2		EIF1B						NT5M
	STIL		SYT4						RFXANK
	RPL39L		EXOC4						DENND1C
	PDCD5		CES2						TRIM47
	LSM6		IFT80						FIBP
	CCT4		CPA4						NDUFS5
	LTA4H		DLG4						STT3B
	PARP2		OR7D2						AFMID
	WNK3		FAM110C						NUTF2
	ELOVL6		MAML2						ANAPC2
			NDP						ZMAT3
			DOCK5						PPP1R9B
			CKLF						NAGLU
			PPP1R14C						TTN
			CLN8						APH1A
			FGF2						THOP1
			ELF4						ZGPAT
			CST4						PPAN
			CD177						TMED9
			STAMBPL1						NT5DC2
			DMRTA1						NAB1
			ADCY5						COX6A1
			MS4A6E						CDK2AP2
			MIPOL1						UBL4A
			RAB11FIP4						ABL2
			CRYBB2						CCDC57
			HNF4A						NR2C2
			LCN12						BRWD1
			UNC5D						HSF1
			OR7A5						PRKAR1A
			USPL1						BOLA3
			GDPD2						SERTAD3
			TMEM68						AAAS
			PROCA1						CBX5
			NMNAT3						PIP5K1C
			TNIK						DCXR
			SCG2						MRPL20
			ITGA3						ANKRD16
			ARHGEF4						GAS8
			PRKAB2						PRDX2
			PRSS2						SAMD4B
			GLYATL2						ZNF692
			ZNF543						UBE2W
			TRIM38						TP53I11
			DRD1						NT5C2
			SLC5A11						WASL
			ZNF605						ADAM15
			SLC14A2						ITPK1
			GIPR						XAB2
			TNFRSF12A						U2AF1L4
			TBC1D8B						LZTS2
			BTF3						MRPS23
			CYP2C9						PIM3
			EMX2						CXXC1
			OLIG1						SLC4A7
			FBXL17						RABAC1
			MYO18A						YPEL3
			PSMD10						NARF
			MUC5AC						SH2B1
			PGM2L1						KEAP1
			SLCO1B1						PRELID1
			SLC25A43						FKBP2
			RNF32						AGTRAP
			GTPBP10						RPS6KA3
			TPTE						ZDHHC24
			FOXB1						KLF12
			GMPR						TARBP2
			SOX13						AP1G2
			PIK3C2B						RNF25
			RNPC3						TOMM34
			THEM4						HDAC6
			MTHFD2L						ROM1
			CA12						MRPS33
			VIL1						CHCHD1
			TTC8						MESP1
			SOX4						MCOLN1
			IGFALS						VPS36
			C12orf54						ARFGAP1
			APOBEC1						KLC4
			FAM9B						SLC5A3
			PIGM						TMC4
			CALCA						DGCR2
			ZNF99						AGPAT1
			CNIH4						PXMP2
			IRF6						NOL3
			NKX2-8						HMGCL
			EEF1A2						CDC42SE2
			SYT12						DHRS4L2
			ADAMTS10						RHBDF2
			LONRF3						FASTK
			SLC28A3						SLC27A4
			GABRE						SLC10A3
			EID3						PHOSPHO2
			PTCD2						DRAP1
			SCARA5						LRFN4
			SCARA3						PCSK4
			STAT2						CBX4
			CDK5R2						SOS2
			SPTLC2						MAD1L1
			IMPACT						NDUFB2
			AMBP						SLC44A2
			LBX2						FADD
			GLRX						MOCS3
			TSC22D2						MPP5
			RAB26						PAF1
			SLC7A10						NEIL2
			TRIM58						DNAL4
			IRAK2						MEA1
			PHF21B						SCRN2
			DBI						USP25
			FBXO8						NUCB1
			ADD2						TBC1D5
			STX1A						TAS2R4
			GYG2						NDUFB6
			ZXDB						NSUN5
			SUCLG2						DHODH
			GSPT2						TRADD
			STMN2						BOK
			CAMK2N1						PRR3
			SMPDL3A						FBL
			CHKA						RIN1
			ZDHHC13						ZMYM2
			GRM8						STRN
			ZNF577						PMPCA
			PPEF1						PFKL
			PLEKHG1						SAC3D1
			PDE1A						RPL28
			HEXA						PRKCSH
			KIAA0100						SMARCAD1
			GPC5						MAP4K2
			SBSN						PGLS
			C7orf31						ZNF283
			LHX1						C20orf27
			MID1						ATF6
			ZNF181						ZNF573
			ZNF77						CCNH
			STON2						ZNF335
			ZSWIM6						ASCC3
			KCNH2						ADAM10
			KCNS1						FBXW4
			NIPSNAP3A						PEX6
			AZGP1						IMPDH1
			KIF13B						CARM1
			RNASE7						HAGHL
			ANKMY2						NDUFA7
			MPP7						CAB39
			PSCA						SCAND1
			CALB1						RAB40C
			SLC12A7						MDK
			SLC29A4						LSR
			UTY						CDK5
			KHDRBS2						BTBD6
			SH3RF2						CNNM3
			KCNJ2						DDX28
			MPPED2						BSG
			C4BPB						MKS1
			CCDC50						DNASE2
			DTNA						FDXR
			NME7						CPSF1
			RND1						KRTCAP2
			HHAT						WDR18
			MAPRE2						ZNRD1
			UPK2						TAZ
			HOXB6						BCKDK
			SLC9A3R1						PPP2R5B
			SLC35F1						FBXL15
			HRK						TMEM11
			ARNT2						ZNF32
			KIFC3						CDC34
			RPS23						R3HCC1
			OR52N2						NPEPL1
			OPN1SW						KCTD17
			ZNF415						DCTN4
			CASQ1						RBCK1
			PTN						ANKRD36
			GABARAPL1						LRFN3
			CD58						ZFYVE21
			HSPA1A						ALG3
			SPOCK3						NUDC
			ADPRHL1						TJP3
			SLC4A8						SLC2A8
			LYNX1						C11orf1
			CMTM2						RCOR3
			ISL1						ZC3H3
			SLC44A1						CLTB
			MOV10						IRF7
			GPR37						GNA13
			SYPL1						HYAL2
			CHST10						CCM2
			TASP1						LIME1
			PTHLH						PFAS
			CNGB1						VPS72
			ZNF354A						ADCK1
			SLC37A1						PHB
			DGKA						RASA2
			RGS7						NEURL2
			OAF						ZNF282
			CLUL1						DOLPP1
			CDX2						SLC4A2
			TPTE2						STXBP5
			C11orf71						GAB1
			NFE2						ETFB
			THBS4						GPR108
			PFKM						KTI12
			UBB						C17orf75
			ZIC1						PTEN
			SLC18A3						METTL1
			MBTPS2						SSBP4
			SST						HGS
			TCEAL4						DYRK4
			PIWIL4						PCGF2
			MYO1B						STK4
			SNX16						TLCD1
			GUCY1B2						SEC24A
			TFDP2						PLD2
			TM9SF2						MYH14
			TCN1						RUNX1
			BTC						DNPEP
			PCSK9						TRIP10
			NOX5						SLC39A4
			TLR3						CD63
			ZNF677						SH2D3A
			PRTG						TMEM81
			LRRC38						PRKRIP1
			KLKB1						PINK1
			BRI3						DDX51
			MBP						GTF3C5
			RAB37						HOOK2
			EAF1						ZNF33A
			MGAM						ZNF483
			FBXL18						AHR
			RNF139						ANKS3
			C17orf64						IDH2
			HKDC1						ELK4
			TUBAL3						LIN7B
			NUP210L						TSPAN9
			ZNF610						SDF4
			UGT2B7						TRAF2
			ANXA10						PDAP1
			SPRED2						HDAC10
			ASB16						GPX4
			SLC16A9						SCRG1
			INCA1						GNB2
			TNNI3						SOX12
			PROK2						CCDC66
			ZNF418						DDX41
			PTK7						SIX5
			SCO1						PUS7L
			LRFN2						TNK1
			FZD8						TMEM134
			OTOS						ERCC1
			OSBPL1A						NCDN
			GALNT7						SNAPC2
			EDN1						MAPRE3
			TUBA1A						METTL6
			GIP						ELL2
			PDSS2						SH3GLB2
			ZIC5						TMEM106B
			IGF2						PLEKHH2
			SLC5A1						LGALS3BP
			PKD1L2						BOP1
			TOM1L2						RFX1
			GNRH1						AHI1
			CSRP1						ARHGAP23
			ETV5						RGS14
			EGFR						FZD2
			TMEM71						PLCD1
			LDHC						RNH1
			BAMBI						MVP
			TXK						TM9SF1
			DUSP5						SURF6
			TG						PDE4A
			EXTL3						NUDT14
			SYTL2						PIK3R1
			SPRR2D						CAPZA1
			OAT						SPRYD3
			SLC23A3						HSD11B1L
			CLK4						SLC25A11
			TFF3						SFN
			LMO4						RUFY3
			TRIM31						CREB3
			CTTN						DGCR8
			UNC93A						MRPL4
			PDE7A						POU2F1
			NCOA7						AIFM1
			ARSH						DPP9
			FOXN1						SHKBP1
			CACNB3						ZDHHC21
			CLIC2						TIMM17B
			TIGD7						ISOC2
			KLK5						TSPAN31
			NTN1						MED18
			DGKG						KLHL24
			ZNF614						RAD9A
			ALDOB						MIB2
			ARHGAP29						NME4
			SPTY2D1						SEMA3F
			UPB1						SPTBN2
			PTGES						RHBDD3
			CCDC127						NDUFV1
			CCND1						RPS6KA4
			ACP6						ZNF593
			ZBED3						RAB3IL1
			PLXNB1						RPP40
			MPHOSPH6						PSMB3
			ZNF217						SHC2
			TRIM32						RAC3
			BMPER						RPS19
			OXCT1						ZFPL1
			MSRA						GIPC1
			SLFN13						EEFSEC
			CELSR1						DUSP23
			RASGEF1C						TNKS
			ABLIM3						LTBR
			DNAJC15						JMJD1C
			LAIR2						RUVBL2
			GUCY2D						FANCE
			PPP1R3C						TMEM104
			TM7SF3						ALKBH7
			CEACAM7						CDK5RAP3
			FNBP4						NME3
			TRAM1L1						ACADVL
			ZNF442						POMGNT1
			MAP2						ZNF581
			HOXA7						NLE1
			ZNF8						WDR34
			STK32B						GNAQ
			NPY						TRIM28
			COBL						SRC
			PADI2						FAM98C
			BASP1						POR
			CHRNA9						RPSA
			TFAP2A						ANGPTL1
			ZNF10						ZNF805
			KATNAL2						ZNF292
			CPEB2						RRAS
			MAEL						ZNF358
			IRX4						C15orf39
			MT2A						PMF1
			PEX1						DHX36
			PLD1						JAG2
			RNASE10						FZR1
			SYDE2						SPAG7
			RASL11B						SYNGR2
			OSGIN1						PPP1R16A
			GPHA2						CLN3
			GRM4						PTPN23
			CDKN1B						SAT2
			POGZ						ARHGAP12
			KIT						GRAMD1A
			ERN1						GRWD1
			TNFRSF11B						TIMM8B
			GPX7						RAB11FIP3
			SLC25A34						KIFC2
			SEMA3E						NUMA1
			AKAP10						PMVK
			KCNC3						MRPL21
			CAPZA2						ANXA2P1
			BFSP1						ADCK2
			AVPR1A						ZNF574
			GLO1						SNORA33
			MRPL39						ZFAND2B
			SFMBT2						UHMK1
			PCDHB4						ASL
			TM4SF19						RANGAP1
			PF4V1						E4F1
			AKAP6						C1orf122
			SPP1						MRPL43
			SCG5						CTDSPL2
			MYEF2						ZC3H7B
			RDH10						TNFRSF4
			SCGN						SH3BP1
			UGT8						NDUFA4
			TPSG1						ARID3B
			PCSK1						ZNF507
			AQP6						MTG1
			DUSP13						POLM
			CYP1A1						GLA
			VSIG8						NCOA2
			MCF2L						PSMD8
			RANBP17						PPP1R13L
			CPLX1						NCOA3
			VEPH1						CCDC22
			SEMA6D						DOT1L
			HECW2						PIGT
			BBS4						MRPL2
			KCNQ4						PKD1
			MYCN						CHID1
			MYO7A						CDC42EP2
			RASL11A						RAB17
			ST8SIA2						TAS2R14
			TRIM52						PUSL1
			HERC3						SSR2
			ARMCX1						FLII
			KRT16						ZNF219
			KIAA0895						VWA1
			BDKRB1						COMTD1
			ITLN1						UBL7
			CTNNBIP1						CTF1
			OTX1						HELB
			STT3A						MGST2
			TLN2						ZNF431
			IL17C						TSPAN17
			CHMP5						EPN1
			RPL12						SMARCA4
			PPARG						MRPS34
			ZNF347						EFHD2
			ADAM28						KRTCAP3
			FGF13						ABTB1
			B4GALNT3						LENG9
			LRP10						PKN3
			SLITRK5						CPEB4
			TRIM36						PLEKHM2
			CDC42EP4						ERCC2
			CTTNBP2NL						TRPT1
			TRPV3						FIS1
			CNIH3						ALG12
			NIPA1						BAD
			SPRR2F						ALDH16A1
			RIOK3						LMAN1
			PERP						RSAD1
			INSIG2						WFS1
			SCN3A						CALM3
			DECR1						CROCC
			CLCN5						MIF
			AMACR						TMCO4
			TEAD2						OSBPL8
			ZFHX4						RHBDD2
			PPP1R1C						FLJ20021
			KHDRBS3						XRCC3
			PDCL						UNC93B1
			C3orf14						ALG1
			IMPA1						MBD3
			CRYAB						PACS2
			S100P						LTBP4
			SLITRK6						CRTC1
			SPDEF						ARFIP2
			RAB12						TLE2
			NEB						TSPAN4
			ETV3						MPDU1
			VIPR2						CLDN20
			FOXI1						VKORC1
			COLEC11						DCTN3
			GSTK1						STXBP2
			PYGB						TNFAIP8L1
			SORT1						GRHPR
			CCDC68						MPI
			SLC13A5						WDR54
			CASR						CARD10
			DNAJC12						CRELD1
			ADRA1B						HIP1R
			LMO1						PATZ1
			MX2						P4HB
			DAAM1						PICK1
			TLL1						TBCC
			HOXB4						RPL29
			PHKA2						NDUFS7
			FAM107B						PLEKHG5
			CSTL1						BTBD1
			LRIG3						ANKRD39
			FAM111A						DEAF1
			SRR						MTA1
			SERPINA1						TESK1
			SMU1						MRPL23
			CALML3						SPAG9
			SEMA6C						CKB
			DCP1B						MTFR1
			L3MBTL3						FKBPL
			BCOR						ZNF513
			PYGM						DBNDD1
			LRRFIP1						ZMIZ2
			PPP2R2C						COX8A
			PNMA5						THG1L
			DSCAM						ABCA2
			ATG9B						CD151
			ZMPSTE24						IBTK
			STK39						PKN1
			REP15						UBIAD1
			SCNN1A						SMYD5
			CDH4						ARL16
			GCNT1						TMC6
			PABPC3						TIMM50
			ABCD3						SLC16A3
			PPP1R9A						PAK2
			ANXA2						MRPL16
			COL9A3						SPATA2
			CLDN9						RABEPK
			UNC13A						C21orf58
			UGT2B28						MRPS24
			FRRS1						TSEN54
			GBA2						LRP3
			LBP						FUNDC2
			NR2E1						TMED7
			ATP8A2						ZNF408
			TTTY10						EPOR
			DEGS2						ZNF586
			CLK1						LZTR1
			PTPRF						DHX37
			LMLN						FOXP4
			C8orf31						MKNK2
			PIWIL1						IPO13
			PROX1						TNFRSF18
			MAN2A2						RCCD1
			CRNKL1						HP1BP3
			LAMB3						PAOX
			GSTA4						CCDC12
			HLA-G						ZDHHC12
			IL18						MRPL41
			DIRAS3						NUDT16L1
			MID2						GAA
			NMT2						MEF2A
			SYCP2						ZNF384
			SIGLEC12						NDUFB10
			TLN1						FBXL14
			ZNF302						FLJ42393
			WARS2						STK17B
			STXBP4						TRAF4
			DCBLD2						DEXI
			TMIE						AP1B1
			PNLIPRP3						NPDC1
			SLCO6A1						RLF
			SLC9A4						BCL2L12
			TRMT12						RPS16
			SWAP70						CDKN2D
			TSPAN11						PIK3CB
			NINJ2						MRPS12
			LAD1						MED9
			NRG4						CSNK1G2
			TRHDE						BMPR2
			CA9						MAD2L1BP
			SLCO3A1						ARHGAP4
			ADH5						TKT
			COL4A5						LRRN3
			MOCS1						RNF168
			FOXA1						MTX1
			TNFRSF10A						MAPK3
			AGR2						BAHD1
			CLN5						REL
			DPEP1						RPS2
			HSD17B2						NDUFB11
			HTATIP2						JMJD4
			CSF3						DNAJC3
			RPS6KL1						CHRNB1
			TRDMT1						EHD2
			PCDHB7						ATP13A3
			WIPF3						NCOA4
			CSAG1						MLLT1
			LINGO4						KLHDC3
			FKBP11						LAMA5
			SLC9A3						ZNF653
			IGFBPL1						KIF22
			DRD4						RTN4IP1
			ENOSF1						ATP6V0B
			ZFP36L2						GSK3A
			JRK						FGD6
			B3GNT7						RNF187
			BCL10						C14orf119
			ISG20						CNOT3
			NPC1L1						CNFN
			ABCC5						SP2
			CERK						CBR4
			PPM1K						SENP3
			ADAM23						ZNF611
			LOXL4						PSEN2
			ITPR3						LMAN2
			MUC15						GPATCH4
			DUSP27						NADK
			DUSP6						CLPP
			SLITRK3						STK11
			LMX1B						GSTZ1
			LYN						GPR22
			PITPNC1						ZNF484
			PLCB4						IGHMBP2
			VTN						WBP2
			SYNPR						EEF2
			MAP3K5						FRAT2
			ANP32A						SMPD2
			SH2D1B						LTBP3
			AP2B1						TMEM109
			TACR2						TEAD1
			ZNFX1						C1orf159
			NT5E						HS1BP3
			ITGA7						GTF2IRD1
			IGSF9						SHARPIN
			PEX11A						CSK
			A4GNT						KPNA5
			CDH3						PRAF2
			PAX8						ZNF254
			ANKRD24						PLEKHM1
			CCNG2						TAS2R43
			ZDHHC15						HSPB1
			DET1						USP35
			COX6B2						MRPS18B
			CD160						RPS26
			FAM83E						CD2AP
			KCNS3						LSM1
			GNRH2						PIN1
			DLK1						B4GALT3
			FAM102B						EVI5L
			GPR39						SLC29A2
			PLS1						SMPD1
			HPCAL4						AKT1S1
			TAF7L						FUBP1
			ZNF251						PRR7
			CHCHD4						MRPL54
			RGS16						ARFRP1
			ZNF426						PPP1R15A
			CASK						CHMP7
			PI16						AAK1
			GPLD1						ABCA7
			HOXA13						PEX16
			PHF10						TMEM101
			TMPRSS11E						PYGO2
			GABRG3						F12
			CCNG1						ARHGAP1
			NR2F2						AP2M1
			AGXT						SPATA5L1
			ACOT11						SPATA20
			ZNF134						POLR3K
			OSMR						PTMS
			LTB4R						SNAPC4
			PCDHB12						FLYWCH1
			SPRY3						BCAT2
			SPRR1B						EEF1D
			ASPHD2						TRIM13
			TYRP1						DUS1L
			LRRC57						MYBBP1A
			ARRB1						POLR1C
			TAF1B						AKAP11
			NKX3-1						MAN1A2
			CDC14A						NUDT18
			SGK2						MT1F
			MAPK8IP2						POMT2
			FBLIM1						IL6ST
			NXN						SFXN5
			NOTCH3						GOT2
			GEMIN8						ACAT2
			RPTN						TRIP6
			SERPINB2						TRIM65
			NR0B1						DAB2IP
			MYLPF						TTYH3
			SNHG3						C11orf24
			SCN1B						HES6
			EIF2AK3						SNRPC
			NEFL						MRPS7
			HSPH1						ACAA1
			BDKRB2						DMTF1
			SRP54						PLEKHA4
			LRRC8A						ABHD4
			TGIF2						PNKP
			FRAS1						SLC35F5
			ZNF382						FAH
			TMEM74						COMMD5
			PNPO						B3GAT3
			SERGEF						EFNA4
			CABYR						TNIP2
			WDR60						DUSP7
			TNFSF14						NOL12
			LYPLAL1						ZNF124
			AASS						AP1M2
			ELF3						ZNF71
			COMMD10						CORO7
			JOSD1						USP53
			LHX9						SMTN
			HEXIM1						COQ3
			UGT2B17						SBF1
			CAPN14						TMED1
			PCDHB3						MMAB
			CACNA2D3						ATAD3A
			MAPK12						OGT
			IDH3A						RCE1
			PITRM1						DMPK
			IL31RA						HIVEP2
			ALPK3						HSD3B7
			ZNF253						GTPBP6
			ADI1						RAB34
			EPHB2						SLC12A9
			IL13RA1						ERP29
			FOXL2						PSENEN
			EEF1B2						PARD6A
			PCDH9						STARD10
			SNURF						UBTD1
			HDAC8						TTC3
			SLC7A4						CYB561D2
			TOB2						CCNC
			VAPB						CRLF3
			PKIA						ZNF587
			QPRT						POLR3GL
			PAPSS2						IFITM3
			ZNF420						EHMT2
			HIBADH						RICTOR
			PPP2R3A						NUCKS1
			SLAMF9						ZNF576
			ACSL4						NAPA
			ETV4						GBA
			EDN2						MRPS26
			SQSTM1						CFLAR
			C11orf45						ASCC2
			SUMF2						ACOT8
			PCDHGB2						COX6B1
			SLC11A2						TTLL12
			NMNAT2						ABHD11
			HGFAC						CD46
			DNTTIP1						TSPO
			ZNF597						ABT1
			JRKL						DCPS
			PRUNE2						MAGED2
			SCGB1D2						AHDC1
			TFF1						LRRC58
			ACVR2A						SLC26A11
			CUTC						SYNGAP1
			GDF11						SIGIRR
			CPNE7						SAMD1
			BAIAP2L1						SFT2D2
			PABPC1						CUEDC2
			KLF6						ABHD14A
			KCNN4						RPLP0
			JAG1						GAMT
			PNN						RUSC2
			HIBCH						EBNA1BP2
			ZNF454						METRN
			DYRK3						ZBTB12
			MLLT3						GTF2H4
			SULT1A2						SLC38A2
			SEC14L2						PHACTR2
			ZNF559						FAM50B
			TUFT1						PORCN
			SDK2						PGM5P2
			SERPINA6						FBXW5
			PIWIL2						FASN
			HOXD10						MGRN1
			PLAC8L1						ZNF579
			TP53RK						SF3A2
			FUT1						ESRRA
			FOLH1						AGPAT2
			EHF						C11orf65
			KRT6A						HIF1A
			SPRR1A						TOP1MT
			DUSP26						PYCR2
			TRO						RPS5
			SEMA6A						DMXL2
			IGSF1						SPSB2
			RPL23						CLCN7
			DNAJC18						PHPT1
			DLX1						PITPNM1
			GUCY2C						MRPL12
			PXDNL						DPP7
			ESPNL						NEK7
			GABRR1						PFDN6
			PHYHIP						RAB1B
			MAP1B						DDAH2
			GBE1						CEP164
			PITX2						ZBTB25
			KLRG2						SPRED1
			PROM2						TMEM129
			DEFB1						APRT
			EPHA2						MAP2K2
			ZNF629						BCL9L
			PADI3						PKN2
			KCNQ5						ARF5
			STEAP2						NADSYN1
			ASPH						HECTD1
			TDRKH						MRPL9
			ZNF404						PTGES2
			S100A14						ZNF319
			ZNF185						CRAT
			MYB						SACS
			OAS3						FAU
			DKK4						NSDHL
			PCDH19						MAP3K10
			DENND2A						SLC35E4
			CYP2S1						DDIT3
			NRG1						IPO4
			GRHL2						RPS6KA1
			WSB1						RAB11FIP5
			OAS2						SAMD10
			FBXL20						CNN2
			AGTR2						SF3B4
			RHCG						METTL2A
			NMU						CREB3L4
			SERP1						NOSIP
			JSRP1						SH3BP5L
			STRBP						LYST
			TOR1B						NR2F6
			FADS6						GDI1
			AMIGO1						ATXN1
			RNF141						RNPEPL1
			PRTN3						SCAMP1
			LGALS4						TUBG2
			ETV1						MRPL55
			MAGEH1						CYB561
			FGFRL1						MRPL48
			ZKSCAN1						VPS25
			OSBPL3						PAQR7
			HCG4						C20orf96
			HMGN2						NOC2L
			ZNF682						ILVBL
			EPB41L1						CST3
			TSPAN15						ZNF24
			GRIK5						SLC1A5
			LY6H						LRRTM2
			PDE8B						SHB
			PVT1						TNFRSF1A
			DENND2D						LRRC20
			F5						TMED10
			ZNF626						ITPA
			SLCO2A1						FGD4
			OR7E91P						SLC30A4
			HBEGF						B3GNTL1
			PRAP1						STK11IP
			TSPAN13						PLA2G6
			TFAP2C						SSH3
			PRDX1						PPP3CA
			CDR2						CD320
			PASK						CDC42EP1
			SLC35D1						CASD1
			ENY2						TRIM41
			CLYBL						IRAK1
			CTNND2						DPAGT1
			NEO1						TMEM87B
			ZMYM5						TMEM91
			MYBPH						ANAPC11
			AGL						ARHGDIA
			ABHD2						BANF1
			OR8G5						ARID2
			TP53I3						HIPK3
			BMX						PLEKHN1
			SLC26A4						ARHGEF1
			ST6GAL1						LRRC61
			RHCE						FBXO44
			PPP1R1A						BCL2L1
			ABCB1						TRAPPC6A
			CDC42BPB						INPPL1
			GLCE						NFKBIL1
			SLC30A8						HYI
			KCNK1						UBA52
			PILRB						SOD3
			MTSS1						NCOR2
			IFI27						ENAH
			XK						NRIP1
			GCG						NSUN3
			ATP1B1						FN3K
			PPP1R3E						CCDC77
			ITGB8						NAB2
			IGSF3						TSC22D4
			SLC43A1						FDPS
			CLDND1						CNTROB
			RNF39						PYCR1
			CHRNA3						EVI5
			ZNF226						EDEM3
			RERE						BOLA1
			AK5						MRPL52
			WNT11						FAM83G
			RIMS4						MAP3K6
			ATP6V1B1						POP7
			CD36						NIPBL
			SCIN						FAM3A
			CRMP1						ZNRF2
			ARHGAP26						FBXW9
			PLXNB3						STUB1
			TMEM121						RBAK
			KSR1
			BTG3
[truncated: 2,399 more rows]

## Sheet: GSE72094
black	blue	brown	cyan	green	greenyellow	grey	magenta	pink	purple	red	salmon	tan
DACH1	ZNF708	RNF44	PLK3	CALB2	MFSD3	ZNF304	DNAH3	PTPRH	TLL2	MTRF1	PRCC	STARD5
PRKG2	IL32	RPL23A	PTGS2	NLGN2	SLC45A4	RNF5	SERPINB11	GLYCTK	KLK10	CLN6	NQO2	CD79B
PTPRB	ST3GAL6	PHEX	MCL1	FAM89B	MAF1	CFHR2	NUCB2	IL27RA	KCNE4	EFS	SCAMP3	SERPINI1
SOSTDC1	KLK8	PFN2	KLF4	DGKD	TMEM52	DDX3Y	FANK1	TREH	BRDT	EPB41L2	SETDB1	UBE2J1
PDE1C	RBM15B	SIN3B	CDKN1A	GRAMD1C	ARFGEF1	HS6ST3	PPOX	MEP1A	ART5	HEY2	USP21	ATP2A3
ANKRD1	MT1A	SERTAD2	CXCL2	GLI3	NDUFA3	SCGB2A2	SERPINB3	SIM2	AKR1C2	MATN3	FLAD1	TP53INP1
CSPG4	TMCO1	PKP2	SERTAD1	PLP2	UQCRC1	TMSB4Y	WFDC6	GPR35	MBOAT1	PCBP3	CRTC2	FUT8
BIN3	UPP1	KRT1	SLC2A3	OR51E2	DENND2C	EIF1AY	TSPAN19	GC	ABCC1	PCDHGA2	CCNL1	PDK1
MORF4L2	AMN	ESM1	EGR3	HSDL2	PLAG1	SLCO1B3	PLP1	NRK	ALDH3A1	CRB3	SCNM1	SPCS1
TRIM25	GLRA3	TOMM40	ADAMTS9	FGFBP1	CHMP6	XIST	STOX1	KIF1B	AKR1C1	FGF10	ARRDC4	TNFRSF17
CDH6	GRIP1	MYOM2	LMNA	PIGA	GRINA	HDDC2	SEC14L3	AHSG	SRXN1	PLCD4	PEX19	ALG5
NR5A2	HCG27	FOXP1	HES1	PLOD1	CYC1	OR7D2	ZMYND10	KCNE3	ABCC8	LRRC32	PFDN2	FCRL2
XDH	RPRM	PLCE1	SLC25A25	RCN3	CC2D1A	LPAL2	PAX1	CFL2	C6orf141	CDH11	PAPSS1	LDLRAD2
PRX	HOXC13	COX17	NFKBIZ	LAMA1	TATDN1	UTY	C1orf87	FOXL1	PROC	SRFBP1	PIP5K1A	CP
BPGM	FCGR2B	HAO1	RND1	ISLR2	LRRC14	CYP1A1	EFHC1	TMPRSS3	S100A6	SHC4	RHBG	CHST2
NRN1	KIAA1328	PKMYT1	IER2	PON1	KLC2	UGT2B28	NRIP3	TMPRSS4	WNT16	WDR77	LYSMD1	SCAMP5
PGLYRP4	CBL	PSMB6	DUSP5	OSBPL5	ECSIT	TTTY10	EYA4	RDH12	GP2	LRP1	SFXN4	IGLL1
CA4	RLN1	CHN2	NCOA7	ECHDC3	TMEM70	OR8G5	ODF2L	TJP2	SMOC1	DDR2	THEM4	POU2F2
EMD	EVPL	MTF2	CSF3	SGCB	BIN1	CALCR	SPATS1	FUT4	OBP2A	ATP8B2	PIGM	P2RY8
GAD1	OTUD1	ATP2A1	SNAI1	HS3ST3A1	DPM2	ARG1	TEKT2	MYEOV	IGFBP2	NPR3	HAX1	CRELD2
LGI3	XCL1	FHOD1	KLF6	ZNF318	HPS6	OR5P3	PIK3R3	FOXA3	THPO	ASZ1	KIAA0100	VPREB3
F2RL3	CYP2E1	PCMTD1	JUNB	RASD2	GLI4	SYCE1	LZTFL1	CAPZA3	ASF1A	DDT	MRPL24	HERPUD1
USHBP1	ASB2	SLC2A1	EPHA2	RECQL	OPLAH	RPS4Y1	CNGA4	EFNB1	GCLC	PCDHB14	PDCL3	CD180
MMRN2	IL12A	TNNT1	DUSP1	DPYSL3	TSTA3	GLP1R	DNALI1	ADH4	CCL28	PTX3	ARL13B	RAB30
ZNF75A	VNN2	H6PD	HBEGF	APBA2	ZNF707	TRIM48	RBM24	CYP7B1	RIMBP2	MAT1A	ZBTB7B	TTTY14
EML4	GALC	PHLDA2	SOCS3	SLC35D3	PARP10	DEFA5	USP2	ANK1	TFCP2L1	TMEM41A	TDRKH	TSHR
DPY19L1	KBTBD8	ERRFI1	RNF122	ZNF486	NUDCD1	CSN1S1	TEKT1	TRIM7	AKR1B10	ARL2	ILF2	SDF2L1
CTNNAL1	RNF24	TTC5	JUND	CPT2	ATP13A2	CHURC1	CAPSL	TSPAN8	ENO3	RARB	MARS2	SPAG4
MLC1	BCL7C	PDCD6	TRIB1	GCNT2	ADCK5	USP9Y	TTC12	PI3	ST6GALNAC4	TGM1	MRPL19	MGAT2
PCDH12	BTLA	EPHA3	NR4A3	RHOC	ZNF561	NLGN4Y	DNAH9	FAM81A	UGT3A1	SERPINF1	RAB13	BFSP2
FABP4	UQCRB	DIO1	SELE	BMP8A	OPRD1	ZFY	WDR63	NTSR1	FGL1	EMP1	ZNF687	TPTE2
DMRTA2	DOC2A	LDHA	JUN	ZNF532	OTUD6B	PRKY	TTLL9	SOCS6	FXYD4	PPIA	SMG5	SSR4
RBP7	WNK4	PDE5A	CXCL1	STRA6	MPG	KCTD8	IL20RA	TSPAN1	CARD14	C3orf52	NDUFS2	INSM2
BCL6B	LNPEP	ACOX2	EGR4	CMTM3	MRPS28	IRS4	CCDC33	MYBPC1	MTMR7	XPNPEP2	UBQLN4	ERN1
SNX22	DOCK10	PES1	FOS	ACAD8	ZNF524	WFDC13	PTPRT	TM4SF4	PLA2G4A	LMCD1	PRPF3	MEI1
SMPX	USP18	ZNF551	MAFF	CTHRC1	NR1H2	DDX43	ZNF460	GDA	KLK12	HEPH	APH1A	CPNE5
MRPL40	CAND1	RPL41	EGR1	PPT2	SCRIB	TMEM31	ZNF440	ADH1A	DLL3	ARRDC1	MAP3K9	XBP1
CYP11A1	KCNJ5	CD1C	CXCL3	MYH15	ZNF467	TNMD	TGM3	RNF183	UCHL1	ADAM22	ATF6	FCRL5
GPM6A	KCNJ11	OGDHL	FOSB	DACT1	THAP7	FLG	THAP10	MSMB	ALDH3A2	TUSC2	KRTCAP2	P2RX1
THYN1	CRYBB1	ALDOA	ZNF331	CIZ1	TMEM68		SPATA18	AKR7A3	ZFP42	PCDHGB7	HDGF	FKBP11
ADCY4	PRKACB	ONECUT1	GADD45B	ECE1	TSNARE1		WDR19	TMC7	ENTPD4	IFT74	VPS72	ISG20
HHLA3	CLCA4	CDK8	RGS2	EYA2	RRS1		TTLL10	CYP2C18	TNFRSF10C	CHRDL2	UFC1	SEL1L
SPARCL1	HOOK3	GABRA3	ZC3H12A	ECM1	LENG1		DZIP1L	CRISP3	SYT7	MRGPRF	SDHC	PPP3CC
PEAR1	ATAD3C	C10orf90	CEBPB	MMP11	SLC19A1		INPP5E	SEMA4G	FGB	MVK	BRPF3	EIF2AK3
HRC	ABCA1	ITGB6	ITPKC	MEIS3	GPAA1		KCNRG	KCNH8	SCG3	ZNF541	ZNF292	SPCS3
DOCK3	MCOLN2	CAPN3	NR4A1	FREM2	FBXL6		TTC21A	NR1I2	ZNF558	FASTKD3	PMF1	UGT2B17
UPK3A	S100A12	RAD54L	RHOB	HMGCS2	CHST12		NEK10	EDAR	TBL1X	MOXD1	UHMK1	SYVN1
UPK3B	ZNF248	CHORDC1	ZFP36	GLT8D2	POLR2K		HYDIN	SLC9A2	AACS	HIRA	B3GALNT2	SERP1
BTNL9	RTN2	SLC18A2	PPP1R15A	FKBP10	DECR1		NBEA	CYP3A4	TBX10	LTBP1	NOL10	JSRP1
JAM2	TMED6	TBX19	ATF3	NAALADL2	IMPA1		CLCA2	CAPN5	C8A	LPP	TOMM20	ST6GAL1
CROT	LYZ	PDRG1	LIF	PLOD3	RB1CC1		OSBP2	MTMR11	TTR	FMOD	LPGAT1	RALGPS2
KIF25	ZFYVE19	ADCY2	HAS2	SMAD6	SIL1		SPA17	GPRC5D	CGA	PRKD1	MTX1	SLC1A4
N4BP3	ICA1	RGS20	KLF10	S100G	PCBP4		DNER	FXYD3	POLR3H	PLXDC2	ZNF669	PLAC9
PCTP	WAS	TTLL4	HAS1	COL8A2	TRMT12		ASRGL1	LRRC19	GREB1	NEXN	PSEN2	KIF13A
CLEC14A	FBXO6	PRG4	IL6	FGF20	STK32C		IQCD	PPM1H	INSM1	HOXA4	GPATCH4	LAX1
GCDH	DDR1	KATNB1	NFIL3	PON3	MRPL15		INTU	MYO7B	SPINK4	SNAP25	B4GALT3	ZBP1
SEMA3B	SPI1	DLX6	NR4A2	LPIN2	SREBF1		NSUN7	CCDC110	GULP1	SERPING1	TMEM101	PRDX4
RAPGEF4	ZNF425	POU6F1		FHIT	ELOVL1		RFX2	MUC12	TAS1R1	SLN	PYGO2	CD38
SLC35A2	PRB2	CALML5		VCAM1	ZNF251		TTLL6	AKR1C4	GPX2	KALRN	POLR1C	ZNF215
CDH5	CRH	B3GNT4		NKTR	ZMAT5		FBXW10	RHOBTB3	HGD	NUDT10	SHC1	GNG13
MGC27382	CLEC5A	PAGE2		VDR	RHPN1		NAT1	EPS8L3	PHOX2B	NPTXR	EFNA4	CD79A
ARC	PDCD4	DDX21		PRRX2	B4GALT2		CAPS	TESC	UGT2B4	TIMP2	NFYA	STT3B
XKR9	MAPK4	SAP30		APOBEC2	TP53I13		MEIG1	MUC5B	PDE3A	GPRC5B	CDC42SE1	PRDM1
VIP	FCGRT	NR2F1		CD200	PABPC1		FBXO36	HNF4G	MGST1	MYL9	GBA	MBOAT2
TMEM88	ZFHX2	CDK5RAP2		DNAJB5	MTDH		DYNLRB2	PRSS3	AFP	PHLDB2	CCT3	DERL3
TMEM123	MYSM1	ZNF132		SNRPN	EXOSC4		CD164L2	POF1B	CA6	CLDN11	SLC25A15	FCRL4
KCNJ8	CEACAM19	C11orf53		DYNC1I1	NUBP2		C10orf67	COL9A1	KYNU	CYTL1	MRPL9	ZNF311
XPR1	SLA	WIF1		PROCR	PPP1R12C		TRIM61	CYP4F12	CYP4F3	IGF1	RBBP5	CREB3L2
RELN	ZNF350	FGFR4		RASSF7	ZNF696		PRIMA1	SYTL5	INHA	SKI	SF3B4	RABAC1
CACNA1F	ZNF664	BPI		PCOLCE	RPL8		STOML3	ATP7B	SYT4	CIC	SH3BP5L	FKBP2
HPS3	IL10RA	SCPEP1		BTD	VPS28		FBXL13	PDZD3	SCG2	KCNMB1	RIT1	PTP4A3
STXBP6	TYK2	PDIA3		CD248	TBKBP1		DNAJB13	PTPRR	SLC14A2	SGPP2	PARP1	IRF4
SLC5A8	KCTD1	SLPI		AFAP1L2	STX10		CACNG6	FAM3D	NMB	PELI3	TAGLN2	SLAMF7
HMBOX1	NOTCH2	ITGB3BP		SNX7	TIGD5		CCDC60	PLEKHA6	FAM9B	HSPA2	FDPS	TNFRSF13C
ATN1	ANTXR2	ZNF622		WNT7A	CBX8		GAS2L2	DNAJC1	CALCA	NPR2	BOLA1	PTPN21
CLDN4	THOC1	ANXA3		KATNAL1	CYHR1		LRRC49	REG4	GABRE	DYNLT3		ISL2
EXOC4	EOMES	PHACTR3		H19	TSSC4		GLYATL2	CES2	EID3	MXRA7		GNG7
CLN8	ULK1	GPSM2		INPP5B	TEX264		ZNF474	SLC9A1	AMBP	SLC9A5		ITM2C
SORBS3	EXTL2	SLC20A1		KCTD15	STAU2		EYA1	HNF4A	CALB1	ANKRD35		SEC24A
CLDN5	FCRL1	F2RL2		TSPAN5	HSF1		EME2	GDPD2	RGS7	NID1		ELL2
RASIP1	GBP5	RHEB		CDR2L	UBE2W		PCYT1B	PRSS2	SST	DST		DNAJB9
SLC25A43	RARRES1	PRRT2		ZNF684	XAB2		ZMYND12	CYP2C9	PKD1L2	DNHD1		MIXL1
STAP2	ENTPD6	PSMB5		CEP70	CBX4		FBXO15	MUC5AC	ZNF511	GLI2		PKHD1L1
TRIM58	CFB	LRIG1		PLK2	PFKL		ALOX15	PIP5KL1	SYTL2	JPH2		AMPD1
EDNRB	ASGR1	TMOD1		C1QL3	RAD21		C9orf116	VIL1	DGKG	ACTA2		KCNN3
EGFL7	MAFK	FXYD6		CACNA2D1	PGLS		SPOCK3	APOBEC1	MAP2	SYNPO2		PRKCA
RNASE7	STK35	PAQR3		LEAP2	MRPL13		SLC4A8	FGF12	OSGIN1	SYT11		WNT10B
CCDC50	SIPA1	POPDC3		PXDN	PTK2		KRT23	CAMK2N1	KIT	SDC2		LMAN1
FLT4	RBMS2	PBX1		DSC3	BSG		SLC18A3	KIF13B	PCSK1	CYGB		PNOC
SLC35F1	RPL9	A2ML1		USP12	CPSF1		DNAI2	PSCA	DUSP13	RBKS		PIM2
ZNF212	GPR171	SORBS2		MSX2	ZNF250		NME5	C4BPB	IL17C	NEDD4		DNAJC3
OR52N2	ABHD5	ZC3H8		CLSTN1	FBXL15		ATP12A	OSBPL7	SCN3A	SCUBE3		TMEM156
GABARAPL1	LIMD2	DENND1A		ERBB3	TAF2		NTN1	SLC9A3R1	COLEC11	CDKN1C		GTF3A
CMTM2	DCP2	CDO1		UNC13C	ZC3H3		KATNAL2	CDX2	DNAJC12	FEZ1		BMF
ISL1	EIF2AK2	PIGO		DGKI	AZIN1		PACRG	PIWIL4	CALML3	NTF3		EAF2
LGI4	SLC43A2	NR6A1		RPL37	CHD7		FABP6	TCN1	PPP2R2C	HSPB2		HBD
COX4I2	STATH	FAT3		SEMA3A	LYPLA1		RIBC1	PCSK9	DSCAM	PTGIS		RAB39B
RHOJ	STAT1	RPS24		EPB41L5	SLC39A4		AKAP6	CIB1	PROX1	SPTLC2		HSH2D
PARS2	IL18BP	LSAMP		RALGPS1	GNB2		IQCH	MGAM	PNLIPRP3	CSDC2		CD19
PCDHGC3	POMC	CREG1		WFDC5	BOP1		CCDC65	UGT2B7	TSPAN11	ADD2		CACNG4
MOGAT1	HSPA1L	POLR2I		GFPT2	FSCN2		INSIG2	ANXA10	NRG4	STMN2		TIFA
TIGD7	HCFC2	CDON		NFATC4	TBC1D16		SLITRK6	PTK7	HTATIP2	ZNF577		POU2AF1
CCDC127	ZNF700	CENPE		CCL11	ALKBH7		RGS22	SLC5A1	PITPNC1	PLEKHG1
ZNF217	MANBA	ZDHHC20		DSG3	POR		CYP2A13	TFF3	SGK2	PDE1A
SLFN13	C9orf16	ZNF598		HOMER3	E2F5		DNAI1	TRIM31	NR0B1	MPPED2
ARHGEF15	CASP4	RILP		HRH1	PPP1R16A		CLDN15	ALDOB	TMEM74	AKT3
ABLIM3	SLC39A10	ECE2		ACOX3	KIFC2		AGBL2	JMY	CABYR	LYNX1
HECW2	TREML1	ZNF528		COL6A2	FLII		SLITRK3	CEACAM7	SQSTM1	OAF
VWF	RAC2	NEK2		SPESP1	ABTB1		PAX8	TRAM1L1	ECHS1	TM2D2
ITLN1	TNFAIP3	FOXD1		WNT5B	BAD		PI16	SCGN	CYP2S1	CRISPLD2
LIMS2	SLC36A1	AOC2		TMEM80	MBD3		C11orf16	UGT8	NRG1	WNT2
C3orf14	MARVELD3	SCN2B		L3MBTL4	COX6C		SCN1B	PDZD8	PRDX1	PXN
KCTD13	CD96	CRIP1		NUDT12	P4HB		DUSP18	FBXL8	CTNND2	TUBA1A
ZSWIM4	LY86	RAN		RAB3A	NDRG1		DLEC1	S100P	ABHD2	ITGBL1
STK39	CHRNA5	PHGDH		CLSTN2	C8orf33		RIBC2	SPDEF	SLC3A2	SLC24A3
NR2E1	HLA-DRB6	CELSR3		CPD	ANKRD39		LDLRAD1	SLC13A5	ITGB8	UPB1
LMLN	FUT7	PTS		SLC4A11	MTFR1		SERPINA6	NANS	KSR1	CCDC8
ADAMTSL3	RXRA	PBK		LAMC1	CHRAC1		MAPK15	REP15	NTS	HOXA7
CYYR1	ATP1B3	PGM3		KRT4	SHARPIN		ESPNL	DEGS2	UGT3A2	C12orf57
ARMCX6	EPB41L4B	NSMCE1		FMR1	ZFAND1		MYB	SLC9A4	SLC23A2	SLC16A2
IGFBPL1	COPG2	PRPF19		PCBD2	GNE		GSTA2	ICAM4	KIAA0319	RASL11B
DOCK6	P2RY12	FMO5		SLC39A13	VPS13B		SCGB2A1	HSD17B2	KIF5C	SCARF2
MASP1	KCTD18	GPR50		TPM4	COMMD5		PPP1R1A	NPC1L1	GCLM	RECK
CD34	NLRP1	SLC14A1		COPZ2	CHCHD7		TEX9	A4GNT	CALCB	LRP10
CPNE7	SIRT4	NFASC		COL16A1	SLC12A9		PPIL6	FAM83E	SLC7A2	HOXB4
SEMA6A	SUSD1	APEX2		CYP1A2	FBXW5		RBM33	PLAC4	CHRD	CDH4
GABRR1	KLK7	CCDC85A		CETN3	AGPAT2		ANKRD45	NXN	KCNK16	PABPC3
FCN3	DGKQ	NPNT		LOXL3	TOP1MT		CCDC13	RPTN	MYT1	ZFPM2
AGTR2	PPP1R12A	TMEM164		GSC	TPD52		C1orf141	SERPINB2	PAH	OLFML1
IQSEC2	MORC2	BMP7		GALNT12	RAB1B		ACSBG1	IL31RA	KRT15	ADAM23
KCNK3	TREM1	ZFP28		VAMP8	ZBTB10		SNCAIP	SLC7A4	CPS1	TACR2
TFAP2C	EPHA7	RPS4X		SYT3	TCEA1		CCDC40	PPP2R3A	ZNF462	HIRIP3
TBL2	IFITM1	TRAPPC1		CORO6	PYCR1		VNN3	TFF1	SMPDL3B	BACE1
LAMC3	ZCCHC12	SP6		ANGPTL4			C1orf189	JAG1	GABBR2	FSTL1
ACVRL1	PC	VIPR1		PDLIM5			RPGR	PIWIL2	BARX1	DKK3
CD36	GALM	BRCA2		TICAM1			IRX1	GUCY2C	BHMT	ANKRD28
CRMP1	MT1L	SAAL1		MTRR			KCNB1	LGALS4	CBR3	PCDHB3
ADRA1D	RRAGD	SLBP		HES2			BAIAP3	F5	ACMSD	SMOC2
GDAP2	FABP5	RPA3		ADCY8			LRRIQ1	PRAP1	HAL	RIN2
RAMP1	PCGF5	CARHSP1		PEBP1			CAPNS2	TRPV4	KLK14	PRUNE2
COLEC10	ATP10A	SALL1		TGFB1I1			SATB2	SCIN	ABCC2	PHYHIP
ZNF680	S100A3	GTPBP2		WFDC12			CILP2	ARHGAP26	PGD	MAP1B
TBX3	F11R	STRN4		GLIS2			SPRED3	PRG2	RPH3AL	S100A14
CALCRL	TYSND1	KLF16		TMEM44			FSIP1	IL22RA1	PAEP	IGFBP7
STYXL1	PSTPIP1	TSPAN3		LIMK1			CNTNAP3B	LIMA1	TACC2	PDGFRA
FRMD3	SIRT1	SLC9A7		NTNG2			SCGB1A1	KLF5	PDE4D	ILK
EMCN	RNF125	ZNF662		CRABP2			PRB4	TRAK1	VSIG1	ANXA6
C1QL2	ATP6V0D1	PAWR		KIAA1755			APOBEC4	BCL2L14	UGDH	MSRB3
TNNC2	PPFIA3	SLC37A3		TNFSF4			WDR78	LAMA3	FGA	PSMC3IP
PECAM1	TFEC	CRTAP		OR51E1			GLB1L	MERTK	PART1	SNPH
PODXL	CTSC	SLC25A5		LAMC2			KIF19	GKN1	RAB15	GDPD5
GUCY1A2	SIRT2	ADAM8		ZNF76			MAK	SMURF2	PAK3	OLFML2A
ROBO4	RELB	CYS1		ATP8A1			SPAG17	ALB	MET	RARRES2
RAB38	COTL1	KLHL9		DLG2			PROM1	TINAGL1	NOL4	PDGFRB
RBM41	MIDN	ENO1		XG			MNS1	CLIP2	OPN3	COL23A1
RNF43	ZNF616	CCDC18		GKAP1			KCNJ16	R3HDML	TINAG	TMEM38A
RBPMS2	MMP15	COX8C		TMEM63B			ABCB9	DUOX2	BTBD11	CNN1
CASKIN2	QKI	KCNA5		STOX2			C20orf85	FUT3	CPE	RSPO3
PCDH17	KIF21B	MOCOS		KIF26B			DNAH7	ADH6	DMGDH	DCLRE1A
FBXO4	PTPN14	HTR1D		TPM1			SPAG16	SLC43A3	DUSP4	SFXN3
AVPR2	VASP	LTK		DAPK3			PZP	UGT2A3	FECH	PDGFD
PDGFB	PRKX	ARNTL		KLK4			AK7	TMEM25	CLDN1	LUM
BRAF	BSCL2	DGKE		FBXO32			ST6GALNAC2	SLC3A1	PKP1	F2R
FRK	TRIM46	SRRM2		UNC5A			PNLDC1	ENTPD2	DDC	SNHG10
GPM6B	TLR6	FGF11		LIMS3			KRT5	BAIAP2L2	TM4SF20	PCBD1
ADAMTS15	MEPE	BTF3L4		RARG			C6orf118	VNN1	SCN9A	PTGER3
MAPK11	TMEM63C	SMAP1		SULF2			ARMC4	B3GALT5	G6PD	PDLIM2
PLEKHG4	TNFSF12	SLC22A15		TMEM30B			DNAH1	CYP2C19	NEUROD1	PDZRN4
CBLN2	GYPC	CBX1		SEMA5B			LRRC34	TRPV6	BHMT2	PTGER1
EBF2	RPAP1	PLAGL2		WDR5B			CRISP2	MYOM3	INSL4	RAB3D
OVCH2	SP110	CCDC51		OFD1			ROPN1L	ITGB4	CD99L2	PTPRD
TTN	PCK1	LIPE		HAPLN1			C9orf24	CDH16	ABCB6	MYLK
TMED9	IQSEC1	PTPRM		TGFBR1			MYCBPAP	CDH17	SNCG	PLA2G5
HPR	BNIP2	FABP7		MMP2			SLC27A2	TFF2	PRDX3	DNAJB4
FAM107A	C14orf39	TBX1		PGBD5			PAX5	CHST4	SLC6A6	PLVAP
AATK	SNAPC3	P2RX2		NLGN4X			TIMP4	XKRX	PFKFB3	MICA
MRPL20	PML	PPFIBP2		MN1			CETN2	GUCA2B	CYP4F11	ACTG2
IL33	ABCB4	SLC7A1		STEAP1			RFX3	FUT6	FZD10	TMEM47
SRD5A1	P2RX4	NUP210		PGF			C6	NR1H4	VAMP5	SNX5
PTPRQ	RNF170	IFITM2		FBN1			MDH1B	ETNK2	TNFSF11	TMEM119
ESAM	FBP1	RCC1		RP2			TSGA10	MYPN	CHL1	FBLN1
FHL5	TNFRSF14	C9orf152		MAP4K4			PIP	REG1A	MAFG	C8orf58
SNRK	C1orf56	LANCL2		PKHD1			MORN2	YPEL1	ME1	SLC12A4
LDB2	TSPAN32	TCF7L1		TNNT2			COL4A6	IFT172	ST18	TCF4
STARD13	FRS3	TCTA		TCEA3			LRRC6	FUT2	CHODL	NAV3
OIT3	PIGZ	HOXA1		SFRP2			CXCL6	F2RL1	CHGB	CLEC3A
SLC5A3	VPS13C	ITIH5		RASGRF2			ZNF273	TRADD	RET	OLFML3
RAI14	ATP11B	RACGAP1		ACAT1			DSCAML1	SLC39A5	NPAS3	VGLL3
HEYL	RHBDF1	ACVR1C		CSPG5			KCNE1	GJB4	NPTX1	AKAP12
CD24	PRMT8	MYOC		FGF1			ESRRG	TAC3	TALDO1	CPXM2
HSPA12B	IFIT5	ITIH2		SLC25A36			BBOX1	MUC17	SCD5	C1R
TMCC3	NRBP2	LUZP2		LAMA4			GSTA3	SLC15A1	CRLF1	PEX14
SLC30A2	RRN3	LRCH2		MCCC1			DYNC2H1	ITGA6	ZNF501	ECM2
LDLR	TBC1D9	ENTPD3		PLXNA1			RIMS1	BCAS1	FURIN	ZFP37
SERPINA3	CMTM4	TTK		DCBLD1			DMRT2	TJP3	CBR1	DLEU2
ARMC9	HSPA5	RPL14		ITGB1BP1			TMEM67	CLTB	MEF2D	TIMP3
TIGD2	TRRAP	LRPAP1		FRMD6			GRIN3B	ERN2	HESX1	RPRML
SH3GL3	HIGD1A	PDZD4		GPR161			KLHL13	PRSS33	PAPPA	SDC4
CASP6	TMCO6	ACVR2B		PLA2G3			TCTEX1D1	MUC13	ASCL1	SDHD
HTR3C	CXCL9	CISH		CDS1			CLDN16	GCNT3	NQO1	GAS6
R3HCC1	HLA-F	UBE4A		MOV10L1			SRI	SMPD3	SLC16A14	TSPYL5
RGS17	NEK8	PCDHGB4		EVC2			CHST9	PF4	CPLX2	CDCA7L
CLEC3B	LGALS2	DMRT1		NBEAL1			RAB36	PPP1R14D	BAALC	CRISPLD1
SUB1	PCDHGA10	CADPS2		EVC			GPR162	FABP1	CEL	NKD2
HYAL2	NFKBIE	RAB11FIP1		ZP2			HELB	NANOS1	DDIT4L	SEC24D
NDST1	TSEN2	CTDSPL		MRC2			ALMS1	CLDND2	CBX2	ADAMTS3
GPR146	IFI16	RAB33B		L1CAM			CHRNE	ENTPD5	HMGB3	SV2B
MESP2	UAP1L1	DYNLL2		SYTL3			C1orf158	IGFBP1	TKT	CCDC3
GJA4	ALKBH8	GAL3ST2		KRT14			CCDC17	SYT13	FGG	TSPAN18
CDH10	IRF8	COMMD4		EPHB1			ARMC2	VILL	EGF	AGPAT1
MANEAL	PEMT	CNTFR		MYO1E			GSTA1	CYP3A5	CDH15	GJA5
RUNX1	SOX2	FAM120C		SOST			C22orf15	FETUB	ODC1	SGCD
IL1RL1	SUSD3	IQGAP1		PLAT			HS3ST1	DQX1	CAMK2B	NEIL2
ELK4	SCRN1	F10		DCHS1			C22orf23	BTNL3	CNGA3	PCDHGA7
PCDH18	SNRPE	ATP9B		FKBP14			TNFAIP8L1	FKBP1B	SLC7A11	CREB5
NOTCH4	TBX18	UBE2U		KCNT1			STK33	CLRN3	SDK1	SPON1
LGALS3BP	ATF7IP	ITPR1		DLX5			WDR54	MST1R	HRG	UNC5C
CABP7	CUEDC1	DPP3		TXNRD2			TSNAXIP1	LYPD2	BMP6	NDUFA7
SYN2	HS3ST2	YIF1A		GPR88			RP1	TCFL5	SLC7A9	NRXN2
APOLD1	DTX3L	IQCE		COL18A1			CASC1	ATP10B	IL1RAP	PPP2R5B
C1GALT1	FLT3LG	CD1A		SNRPD3			WDR49	PCDH1	TRIP6	FZD1
PLA2G4E	TRIM55	ATP2B4		DTNB			CLDN8	MUC2	PANX2	MCAM
SOX17	FKBP8	BRMS1L		NNMT			C21orf58	STK24	KNG1	TCEAL7
CD300LG	RHOF	CRNN		RND3			AKAP14	CLMN	HES6	CNTNAP1
THBD	ZAP70	CYBRD1		RUNX2			SPATA4	BACE2	ABHD4	ID3
P2RY1	TMEM14A	SP8		SLC26A5			OSBPL6	INSC	ZNF710	PRICKLE1
ITLN2	RUSC1	PITX1		COL6A3			DNAH10	ICAM1	KLK11	STON1
SIX4	FYN	ALS2CL		ANGPT2			CYP2C8	SEMG1	GK	PDGFC
NUDCD2	TK2	RPS6KA2		SLITRK4			SRGAP3	PLEKHH1	KLK13	DPT
BDNF	HLA-DPB2	IFT52		ADORA1			BBS12	ATP8B1	GSR	EDIL3
RAMP3	GBP2	FAM24B		ST3GAL4			FOXJ1	KRT20	KLF8	TRIM24
RGS5	ANXA1	IPMK		WT1			IQCG	MYO1A	AKR1C3	TRIP10
ENG	TCP11L2	POLR2H		IGFL2			EFHB	BTNL8	IDH1	FBXL7
SOX18	LRRC56	SSX2IP		PCCA			ADH7	EFNB2	GALNT3	TSPAN9
KIAA0040	TOR2A	SNORD36C		HINT2			LRRC46	GUCA2A	VGLL1	HDAC10
ERG	TSPAN33	ANXA2P3		PNMA1			CSMD1	OLFM4	FSTL4	SCRG1
SLC27A6	SLC8A2	IFT140		TUBB2A			IHH	CA2	TFAP2D	TSPAN2
SSTR1	ENTPD8	SCGB3A1		SNAI2			KNDC1	SULT1B1	HAVCR1	TMEM134
CAV1	CARD6	CDC25B		ORMDL3			AAK1	SPINK2	VPS37A	TP53INP2
DKK2	LTF	MPZ		P4HA3			CCNA1	TNNI2	COL25A1	PDZRN3
AMOTL1	SPRR2E	MON1A		GJB2			EFHC2	ANXA13	FASN	SH3GLB2
ZNF366	RAB4A	MLPH		BICC1			ABCA13	SESN3	PCSK2	CLDN10
GJC1	SDC3	GNAO1		P4HA2			MORN3	ATP2B1	RASD1	ADARB1
WFDC3	CATSPER1	CIRBP		CLIC4			TTC16	MYOM1	TXNRD1	ADK
MYCT1	ARHGAP22	ZNF69		ZADH2			NEK11	DCDC2	CHGA	SERPINC1
RHBDL2	ATP2A2	TEAD4		MSX1			TEKT4	REG3A	G6PC	AIFM1
IQSEC3	ARHGEF16	FOXRED1		PAFAH2			RBM20	IL1R2	PRELID2	PMP22
AGER	ZYX	MYO5B		ERGIC2			SERPINI2	ARL14	IRS2	HSPG2
CEACAM1	GAL3ST4	PTPRZ1		ACADM			SLC23A1	HR	TBX15	HOXA3
GCM1	CST6	ITGA10		KIF3C			GABRP	ICAM5	UMODL1	STX8
APLN	SDCBP	ANP32C		CDC42EP5			LRRC18	FA2H		GABRB2
DLL4	BLZF1	TRIM71		PACS1			SPAG8	CCK		PKD2
ABCC9	JAKMIP2	ANKRD6		GLS2			SRD5A2	CYP2B6		ZNF805
RASL12	LGR4	GNAI1		CHST3			LRRC43	ELOVL7		SYNGR2
EN2	AKAP9	BMP8B		ADAM12			EFCAB1	PRAF2		ZNF649
NPDC1	LILRA5	TNS4		USP54			SLC22A4	TRIM29		LRRC4C
MRPS6	PLA2G4C	PPIF		NAV1			IQCK	PIK3C2G		ZNF423
LRRN3	SPPL2B	DOCK9		FZD5			CYP2F1	GCKR		DCN
SHANK3	LYPD5	OS9		GPC1			TEKT3	C15orf41		PARVA
SP5	SLC19A2	RPUSD3		DHCR24			SEC14L5	MUC6		GABRB1
SOX7	PILRA	ADRB1		BCL3			SLC35E4	GBA3		PODN
CHRNB1	DEFB126	HDAC2		IFT80			SPAG6	CHMP2B		KERA
BCAS4	IL12RB2	PLSCR4		B4GALT6			LRRC4	SYT8		NCOA2
PDE2A	NAPSB	RGL1		LNX2			OXTR	ONECUT2		RNF138
NOTCH1	TAF4B	BLVRB		CD177			DZIP3	USH1C		KLHL3
EPAS1	LTB	SATB1		IGFBP3			TTC25	COL17A1		PCDHB16
KCTD9	SLC6A8	PRKDC		PIN4			TNNT3	LCN2		FZD4
ZDHHC3	USP45	ZNF585A		RAB11FIP4			RYR3	SLC28A2		UACA
ID1	APOBEC3C	IGSF10		POLR2L			ZNF214	CALML4		PALLD
CNFN	TBX6	POLR2J3		FBLN2			TP73	ANXA4		C1S
CCBE1	FLT3	ST6GALNAC6		ARHGEF4			LRRC23	APOB		SGIP1
TM4SF18	DDX58	SUMO2		TNFRSF12A			DNAJA4	SERPINA4		HOXA5
KCNG3	CENPB	ELN		OLIG1			FAT2	RAB34		VCL
ZNF484	LAIR1	LEFTY2		KCTD11			ZNRF2	PAQR5		SLC26A2
ALDOC	NFAM1	CGREF1		RNPC3			DUSP19	NOS1		GAS7
NMUR2	PPM1L	B3GNT3		NUAK1				FARP2		TMCO4
SRPX	TDRD1	SF3B5		IGFALS				CIDEC		SLC38A4
RDH16	C1orf109	FBLN5		C1orf210				ELOVL5		OSBPL8
SCUBE1	SLC37A4	MPL		ZNF99				SOX9		PCDHB10
TEK	KLHL25	CAMK2D		ELK3				RASSF8		NDRG4
SLC6A4	TFAP2E	SGCG		ADAMTS10				RASSF6		EDNRA
NES	TMEM86B	NMD3		LONRF3				TM4SF5		ZNF718
SEMA3G	RPIA	TMTC3		KIAA0319L				SLC35D2		MYADM
HIGD1B	GCHFR	TMEM64		SUCLG2				NRG3		ZNF586
TUBB1	LY6E	KCNH6		GRM8				CIDEB		CALD1
RBP2	ECH1	TH		PPEF1				GATA4		LGR5
SH2D3C	TMEM99	GRHL3		DNM1				ANKS4B		SMAD1
GNG11	JAK2	MSI2		GPC5				C8orf48		NAP1L3
RAMP2	TNFRSF13B	NPPC		MPP7				FGD4		TRPC1
HOXD3	SIT1	DKC1		GALNS				ACY3		SBF2
MMACHC	IFNG	ARHGEF2		GAS2L1				KCTD3		HOXA6
SFRP5	PAK4	PRSS22		GPSM1				NAB2		GPR153
SLC35F2	CD300E	HPN		HOXB6				PRSS1		OLFM2
ARHGEF10	NHLRC2	HTR3A		PGM2				TNFRSF11A		CNN3
LMO2	N4BP2	TOP2A		SP4				SLC45A3		GRP
ACOT8	PVR	SGPP1		PLAUR				CYP4F2		JAM3
WFDC10B	GRN	UCN2		CYP4Z2P						PCDHB6
STAB2	EBI3	MAGEE2		SLC44A1						KIF22
SLITRK2	BTN3A2	IL11RA		DDAH1						PKIG
POU3F2	PTCRA	TACC1		LDHD						LIX1L
SLIT3	SLC31A2	LCT		ZNF691						MUC20
MAP7D2	SLC25A24	RPPH1		C1QTNF6						PHLDB1
HEY1	GNA11	DPPA2		PTHLH						ARHGAP28
SIX1	BTAF1	SLC41A1		ACTN1						ITGA1
CDH1	TNKS1BP1	TOB1		CLUL1						TAS2R43
SLC5A9	C3	DSP		C11orf71						CD2AP
ADCYAP1	TRIM22	KCTD7		UBB						TAGLN
CTH	USP34	CYP39A1		BTBD9						ABCA7
RNF152	TAF1C	ATP1A2		LXN						SEMA3D
LHX6	RHOH	ABR		TRPS1						PRND
GRK5	USF1	SLC25A27		BTC						MPDZ
SLC19A3	FAM3B	MAPK8IP1		PRTG						PTMS
PPP2CB	SH3TC1	HSPE1		LRRC38						LATS2
FBXO27	HDAC11	CA10		BNIPL						CXCL12
CETP	STX11	ALKBH4		FN1						FLRT2
FAM43A	ZNF713	BRIP1		NUP210L						PLN
LRRTM2	ANKRD22	SORL1		INCA1						PLEKHA4
TAL1	ACTA1	QDPR		PDSS2						HEG1
GFRA2	POLG2	RBM38		CKAP4						CTNNB1
GYPE	ADNP	SMAD3		TOM1L2						PLEKHA7
TIE1	JDP2	NDN		PCDHGA9						PTGIR
SELP	DHRS2	PIGX		TG						HAND2
OCIAD2	BPNT1	DEPDC1		EXTL3						NOL12
ST8SIA6	SERTAD4	TDRD5		BCAM						ZNF277
FOXF1	HOXB13	SLC6A15		LZTS1						MAP1A
	CACNA1H	RLN3		PTGES						TUSC1
	HPX	SARM1		CD276						SBF1
	GRHL1	DMXL1		DMWD						HOXA2
	B3GNT6	CHMP4C		TM7SF3						DMPK
	PLA1A	FAM83A		SRPX2						PRSS16
	CD33	NRP1		BASP1						GTPBP6
	ZNF266	RNF126		PRKAB1						ERP29
	GBP6	SYNPO		MAEL						DIO3
	GABRG2	ASF1B		ZBTB11						CCNC
	SLC25A42	DPH3		MT2A						FLNA
	SCML4	MAGEA4		SYDE2						IGFBP6
	SH3BGR	ALDH1B1		TRPA1						FILIP1L
	CCDC24	SLC33A1		TNFRSF11B						KLHL4
	IFI44	POLQ		GPX7						SREBF2
	CAMK1G	TXNL4B		SEMA3E						TBXA2R
	PNMT	PPP2R3C		AKAP10						ASPN
	TPP1	STC1		COL15A1						EFEMP2
	IVL	LYAR		SPP1						COX7A1
	MBD6	MTHFR		NUDT2						FMNL2
	CCT5	TUBB3		RANBP17						DZIP1
	BBX	FAM90A1		CHSY1						SFRP1
	CCDC47	CENPA		PHLDB3						LACTB2
	CCL8	CHEK1		ZNF236						SLC38A2
	PLXNC1	CCDC71		KRT16						HTR2B
	BAG1	TNK2		CTNNBIP1						SSPN
	RETN	MYO1C		TLN2						LRP1B
	PCDHGB5	ATAD3B		SFRP4						ZNF521
	ULK3	LHFPL5		LRRC15						NAT2
	JUP	PTER		CNIH3						SPSB2
	UAP1	GAB2		TUBB6						PTPRG
	TBC1D19	WDR3		CLCN5						TMEM62
	ATP13A1	CRADD		ZFHX4						DDAH2
	RAB40B	ZHX2		GADD45G						APBB2
	MCOLN3	TMEM26		PTGFRN						CSRP2
	KLRB1	DHCR7		LOXL2						PCDHB11
	GOLGB1	IGF2BP2		BVES						ROBO1
	FNBP1	GABARAP		FHL2						CNN2
	EMILIN2	PLA2G10		L3MBTL3						GDI1
	CAPN12	ZNF540		ABCD3						DNAH11
	FABP3	KCNJ1		PPP1R9A						SGCE
	LILRB1	NDUFB5		PRKAA1						PAQR7
	ACTN4	CIAPIN1		NUMBL						PCSK5
	FGD2	F3		HTRA1						SYDE1
	DOCK2	ARRDC3		SPOCD1						IGFBP4
	TBC1D8	AADAC		DCBLD2						LMOD1
	SPIRE2	THRA		LSM11						TRAPPC6A
	IL1RAPL1	MAGEA12		TNFAIP6						FZD7
	IL1RN	BAZ2B		PPP2R5A						ZNF329
	PARP14	MAP6D1		DPEP1						TBL1Y
	OSBPL2	PIGK		KCNK5
	VAT1	RPL13		TRDMT1
	CSF3R	C18orf21		ZNF141
	ADCY6	CAMK1D		FGFR3
	DCUN1D3	SFTPA2		FLNC
	CD300LB	CRYZ		LINGO4
	ZNF613	WWC3		ENOSF1
	HRAS	NUDT1		ITPR3
	IL24	MAGEA1		MUC15
	BCL9	CACNA1B		PCDH7
	SLC31A1	LY6G6C		CHRM1
	RASSF3	AURKAIP1		OCLN
	TIPARP	CDC6		SLC38A5
	CARD8	SFTPD		PNKD
	SPHK2	DMRTC2		RSBN1L
	RLN2	GEMIN5		ANP32A
	TLR2	KIAA1109		NT5E
	CLCN3	RPS15A		COL6A1
	HAMP	NTNG1		DET1
	BIN2	GADD45GIP1		CPT1C
	HES5	CLIC6		ARSI
	LRP5	CXCL14		HPCAL4
	NT5DC3	FANCG		RGS16
	CD69	COX5B		GPLD1
	MGAT4A	RFC5		LOXL1
	SLCO5A1	SNRPD2		PMM1
	CD74	LCAT		COL11A1
	STOM	SART1		SPRR1B
	PCDH8	ZIC3		NKX3-1
	CD244	CENPF		FBLIM1
	SLC15A3	NFIX		NOTCH3
	STAC3	SEMA4B		COL5A2
	KRT40	DPYSL5		COL3A1
	DOCK8	CLASP2		LRRC8A
	PLCB1	ALKBH3		LYPLAL1
	BLVRA	CKM		ADAMTS12
	RGS1	POLA2		LHX9
	VWA2	NDUFS8		EPHB2
	HSD11B2	ALAS2		QPRT
	SIGLEC11	SLC2A4		SH3PXD2B
	UBD	RPP25		EDN2
	PTOV1	PAFAH1B3		GDF11
	PDE4B	MAL		SCP2
	PBX4	INCENP		KCNN4
	KCNQ3	FKBP4		MLLT3
	PRLR	ZFX		HOXD10
	RNF148	CTXN1		FUT1
	SULT2B1	KRT33A		KRT6A
	GNGT1	MAMDC2		SPRR1A
	LRRCC1	EPHX2		TRO
	UTS2	GFRA1		SPARC
	KRTAP5-1	GPR19		PXDNL
	DPEP3	NAP1L2		GBE1
	ZNF30	SLC1A7		ACOXL
	PIK3CA	ABI3BP		STEAP2
	GIMAP7	HDDC3		PCDH19
	RGS19	EPDR1		RNF141
	GNGT2	PRKAR1B		TMEM42
	UGCG	MBNL1		HCG4
	LAG3	HSPBP1		HMGN2
	PEPD	MRPS35		ZNF682
	AXL	CLIC5		LY6H
	DDO	TUBG1		FAM78B
	ZNF205	PSORS1C2		CDR2
	PSAP	RDM1		CLYBL
	OVOL2	PSMA7		ACSM3
	SLC22A5	MRPL38		AGL
	PREX1	FAIM2		COL4A1
	CYP2W1	TMEM115		PPFIBP1
	MPP3	BMP5		SLC30A8
	STAB1	FCHO2		HEMK1
	SCAMP2	C1QTNF2		KIAA0232
	TCF7L2	SLC6A20		AK5
	MAP7	WDR43		EMILIN1
	ICAM2	STC2		TMEM121
	TMEM17	BNIP1		BTG3
	SCCPDH	ADSL		EIF5A2
	ALDH8A1	ARHGAP6		STX2
	DCUN1D5	DNAJB11		SPSB1
	KCNAB3	MAGEE1		CLDN23
	RHOT2	MFSD5		HSD17B3
	TRIM11	PLA2G4F		SOX11
	CBLB	TPX2		A4GALT
	GRK6	CNOT8		PRR5
	ATP6V1B2	PNPT1		LIMD1
	RAI1	XRCC1		CDH26
	MDM1	CYP4F8		SH3GL2
	ARHGEF10L	DDOST		ADM
	ZNF85	OTUB2		FOXD2
	PPP1R13B	LY6K		MRPL14
	OXSM	KDELR2		FBXO17
	MS4A7	CEACAM8		FAM126A
	HTRA4	NUDT8		PSD
	CLOCK	MTNR1A		SUOX
	ATF5	PSMD3		LIMK2
	P2RY13	ALDH1A1		LRBA
	IFT81	TMEM159		SH3GL1
	CMTM8	DPYS		EPHB3
	AVPI1	SPINK6		LPA
	ARPC1B	SLC2A13		ABO
	ZBTB37	CCHCR1		MXRA5
	DPPA5	RPL26L1		ITGAV
	LILRB5	CEP152		PRKCD
	GIMAP8	AHNAK		JPH3
	LAMP2	RAB6B		EGFLAM
	IL22RA2	DDN		CHPF
	ICOS	METTL5		RBM11
	HLA-B	GUCA1B		S100A10
	IFIH1	ZIC2		HTRA2
	ZNF607	RABGGTA		SNTB1
	EHD4	PRKCG		PRSS23
	FBXL16	SCUBE2		LIPH
	LAP3	PLA2G2F		EREG
	SLC5A12	TMBIM4		ADAMTS14
	CCDC121	CSTF2		COL5A3
	UQCRC2	LYPD1		SERPINA5
	ZDHHC8	CDCA2		ACADS
	ADAM19	TIMM10		TXN2
	INSR	ARF4		CHST1
	OBSL1	CD1B		BGN
	GPR65	SGTA		DPP10
	LRRC3	NUP188		FOXC1
	GPAM	PGAP1		GAS1
	PCSK1N	MAGEA5		BCAR1
	AQP7P1	CYCS		MRPS25
	MTMR12	WDR62		MMP3
	HOOK1	ROS1		KRT6C
	VMO1	NOVA2		IBSP
	TMEM63A	REST		PFKFB2
	ZNF615	KHK		ZBTB44
	INSIG1	IMMP1L		ISLR
	RFK	TMEM125		PNPLA4
	CUBN	CFH		P2RY6
	TMED3	PHB2		SEC14L4
	KEL	GPR17		MFAP5
	NHLH2	MLLT6		FAP
	ZNF12	SEC61A2		TMEM117
	RAD1	TMEM50B		SLC12A8
	SLC6A11	UPK1A		KCND1
	GZMH	C18orf54		SH3BGRL2
	FAAH	USP11		IRX5
	NAGA	COX7A2		MLYCD
	PLCH2	GNPNAT1		CDA
	ARL3	HSPB7		HCFC1R1
	NDUFA11	CHST7		GALNT5
	RGL2	KRT13		HMGN3
	TIA1	SLC6A2		COMP
	TNFAIP8	STXBP3		LDLRAD3
	PDE6B	NDUFB7		FSTL3
	CLCNKA	ZNF264		LEP
	FRG1	EMP2		COL24A1
	MYC	NOC4L		MOAP1
	DHTKD1	NGDN		BMP1
	CD3D	HAT1		GAP43
	MAP3K8	FANCA		OMA1
	PTP4A1	BYSL		COL12A1
	SOX15	LIG1		CILP
	GPT2	SALL2		SERPINE1
	FCGR3A	CRYM		PLA2R1
	GAS5	ANKK1		MARVELD2
	CNKSR1	RERG		TTC19
	HCP5	GOLT1B		PRRX1
	RNF175	SETBP1		HACE1
	TRAF7	TMEM33		GPR160
	MAMDC4	EBF3		MMP13
	GPR37L1	ARID4A		MYH9
	PHKG2	AP3B2		WWC1
	AKAP5	ARMC6		WDR17
	ZNF267	ACLY		CST2
	BAIAP2	DACH2		FNDC4
	ITGAM	HSP90AB1		NETO1
	ATG10	CACNB2		GPR143
	RAP1B	GLTP		KCND2
	TDO2	RPL22		AGPAT4
	MMP7	GIT1		PRSS8
	CLEC2D	ZDHHC11		TWSG1
	BHLHB9	LIPK		JOSD2
	CPNE4	VWCE		MAN2C1
	NDUFS1	LYPD3		THBS1
	CSPP1	CHEK2		SERPINF2
	NMI	DVL3		FBN2
	IARS2	CAPN9		EPHB4
	NOS1AP	FTHL17		KIRREL2
	MAST3	LAPTM4A		AMPH
	PIK3C3	TRMU		METTL3
	GJB7	COL21A1		OPRK1
	OASL	THUMPD3		THY1
	LACTB	KCNV1		RAVER2
	TULP3	LRG1		HOXB7
	CECR2	ABCA10		SMO
	HCST	CLDN18		NPTX2
	RPLP1	ABCA5		GRB14
	GPRC5C	PARP4		NR2C2
	RCN2	NLN		ST7
	TMEM107	DDX6		EXT1
	MAGI1	SLCO4A1		ATP11A
	CLDN7	ZNF681		RBM6
	LCP2	PLD3		DBN1
	GNL3L	EME1		PARD6G
	PRDM8	CDK4		ALDH1A3
	ZNF337	FMO2		ENPEP
	BLNK	GARNL3		USP13
	APOC1	FGF19		KLF7
	EFNB3	RARA		STX19
	TM6SF1	ENTPD7		DKK1
	PRKCQ	HCN2		SPON2
	SH3BP4	METTL7A		ARL4C
	SP1	AQP3		PDE10A
	ATP11C	CENPH		POU2F3
	KCTD12	CCL7		PRKCZ
	SLFN11	NOX1		LGALS1
	CYBA	VEGFA		NUDT11
	ISYNA1	CYP2U1		CYP26B1
	SH3BP2	LHPP		GREM1
	EMP3	FOXA2		SLC17A3
	MIF4GD	CCDC34		WWTR1
	SNX2	ACTL6A		ZNF595
	PARP11	LRRTM1		SLC2A10
	HLA-DRB1	SNRPA		HMGCL
	FAM78A	CES3		TIAM2
	TPK1	CSTF2T		FLT1
	FKBP5	ST3GAL1		ATP1A1
	MPND	TNFAIP8L3		ACADSB
	AMDHD2	CAPN2		HTRA3
	NOTUM	KRCC1		SLC10A3
	AEBP2	GATM		NRP2
	ASB4	AMD1		ALDH5A1
	GLUL	TDRD6		RPGRIP1
	CGRRF1	NFXL1		GPC6
	PLXND1	FEN1		MEG3
	PHLDA3	QRICH2		RPS6KA5
	DNAJC10	SGSH		SEMA3C
	HORMAD1	GAST		PPIC
	EGFL6	ORMDL2		SCRN2
	OPTN	SERF2		USP25
	C3orf38	NUDT22		RPL34
	S100A4	KCTD5		HIF3A
	DEFB114	AP4M1		SSH1
	SBK1	DHRS7B		FGFR1
	PPP1R3F	ARFGEF2		RIN1
	ZNF195	CDK2		IGFBP5
	INE1	NDRG2		INHBE
	UBASH3A	PTRH2		PLEKHB1
	CUL7	ARNTL2		APLP1
	IL21R	GALR2		USP44
	IL4R	PJA2		PLCXD1
	BIRC7	DNASE1L3		MTTP
	KCNAB2	FAM91A1		SDHAP3
	ITPR2	TDRD10		CARM1
	MGAT5	AP1S3		AUH
	RAB20	FMO3		ZNF503
	POLR2A	ZNF211		KCNJ12
	ASB9	COMMD2		LDHAL6A
	NAGS	LMNB2		CA13
	STARD4	RSPO2		CBLN1
	ITGAD	FBXL19		ALDH1L2
	TBXAS1	CA3		SLC16A12
	METRNL	RGS9BP		PXMP4
	SIGLEC7	HOXA11		CHN1
	CFDP1	CBX6		ANGPTL2
	FZD6	RCC2		PDIK1L
	ZNF256	SPATS2		PARD6B
	GAB3	TRIM9		AGT
	LILRA6	RASAL2		ACE2
	ALDH4A1	SH3D19		ATP8B3
	RAB32	LGR6		SULF1
	ZNF547	AQP4		LRP2
	FTL	APBB1		RGS4
	HLA-DMA	RPS19BP1		GPR68
	CLEC12A	RIC3		FNDC1
	CXorf21	DHX34		ADAMTS4
	OR13A1	SPINK5		C11orf1
	LRP6	PDCD10		COL1A2
	PTPN22	ST14		HOXD8
	DPM3	NFAT5		COL5A1
	ACVR1B	C1QTNF7		TMEM97
	RHOBTB1	REEP4		SLC16A1
	NENF	MYH2		MFAP3L
	PRH2	RPS21		SHOX2
	IL17RE	TBC1D7		CORIN
	ARSG	MAP2K6		CORO2A
	ZNF281	SH3BP5		STXBP5
	CD40LG	TES		PLXDC1
	SLC12A2	RSPO1		IGFL3
	ZNF383	GSTM2		MMP10
	PLD4	PAK1IP1		MDN1
	PRKCH	TCF21		TBC1D24
	GPX1	LRRK2		SSBP4
	XRCC5	SPC24		ITGB1
	SLC4A3	IGF2BP1		ADAMTS18
	AGRP	ALDH2		ST6GALNAC5
	IGSF8	CNDP1		GPR87
	FCGR2A	CA5B		LAYN
	ZNF154	ZNF560		GOLPH3
	STAC	TMTC2		C12orf49
	NUDT17	POLE		MRPS36
	DOCK4	TUSC3		XAGE2
	BCAP31	C14orf132		S100A11
	PCCB	WNT2B		ZNF620
	GSTP1	SLC16A13		PTCHD1
	TNFRSF1B	SMARCB1		PACSIN2
	NSUN6	ZNF675		OVGP1
	TMPRSS6	GABRQ		EHD3
	CITED1	PLA2G1B		PLA2G12B
	RBP4	LAMB2		TRAM2
	CD82	CAMK2N2		GPR176
	SMARCD2	S100A7		WDR41
	ZNF276	HSD17B8		CCT6B
	FZD9	TSPAN12		SNAPC2
	CCL19	GUF1		ZCWPW1
	TRIM45	SLC16A4		AMDHD1
	SLC6A3	HDAC4		ZNF365
	FSIP2	ASCL2		MFGE8
	LCOR	ZBTB40		FZD2
	DIRAS2	SPTLC3		MCTS1
	KLRK1	SNN		ZSWIM5
	CTLA4	ASPA		HMGCR
	PHC3	SFXN1		CD109
	HIVEP1	BCHE		DPYSL4
	STK10	ZFP3		IRS1
	GRIK2	DBF4		TMEM116
	POLD4	LONRF1		ZDHHC21
	NFATC1	LIG4		KLHL24
	FCER2	YIF1B		FJX1
	FCRL3	TSEN34		CAMK2G
	PHF23	FRAT1		FHL3
	PELP1	CBX7		SFXN2
	DYSF	DIAPH3		OLFML2B
	NPC1	IFRD1		MMAA
	HSF2	PLK1		RAB3IL1
	GLCCI1	CHMP4B		FSCN1
	RAB25	NT5C1A		HOXB5
	CYP51A1	SNHG8		HOXB2
	PLEKHA3	GALNT2		COL10A1
	LRAT	SIRT7		GPR173
	HS3ST3B1	SKIV2L		SEC23A
	TMEM154	DTX4		NUDT9
	TIMD4	MXD4		HOXB3
	MST1	LRRC31		MAL2
	CCL21	LHX2		MFAP2
	SLC16A10	SNX25		FAM76B
	PFN4	GALK1		LAMB1
	EVI2B	SNRPD1		GAS2
	ZNF419	COMT		SYNE2
	CLDN3	CNTN6		ZNF358
	SARS2	MAFA		DOK5
	SMARCA1	FRZB		SLC25A20
	MYO9B	STAG1		C15orf39
	LSM10	SLC25A4		FST
	SAMHD1	ZNF471		TMEM45A
	EGR2	TRIOBP		KCNJ6
	PPARGC1A	S100A13		ANKH
	SPR	TAF6L		NEK5
	PLEKHF2	SYPL2		FDFT1
	DMAP1	GOLGA8B		LOX
	AQP9	CNTN3		DHDH
	ARID5A	CFI		SEMA6B
	ZNF80	HTR2C		ITGA5
	RFNG	N6AMT1		ADAMTSL1
	CD163	GPS1		SLC24A2
	ZNF630	PCDHA11		ALDH6A1
	NFKB2	HYAL3		RPL35A
	CSTA	PDLIM1		ITGB5
	SYT17	BAAT		C1orf122
	ANPEP	LHX8		FOSL2
	RASSF2	B4GALT5		HSPA12A
	D2HGDH	TPPP		C1QTNF3
	RENBP	SLC35C1		AMIGO2
	DLG4	CD47		CDX1
	ENC1	PRL		CDC42EP2
	NDP	MATN2		RAB17
	HSF4	PITPNM2		ZNF436
	DOCK5	ABCA4		PLOD2
	WIPF1	ANKRD27		TRIM68
	ARHGAP5	AAMP		NNT
	ELF4	RCBTB1		SERPINH1
	LILRB2	ETNK1		ZNF431
	FADS3	NASP		FAIM
	ARMC7	VPS13D		MAP3K15
	REEP6	PUS7		ZNF433
	SLC25A35	TMEM69		SSTR2
	DNASE2B	GATA6		GJB6
	STAMBPL1	ZNF670		LRRC39
	CD48	HSPB8		MIA2
	DMRTA1	SLC6A9		BMP3
	GZMA	GTSE1		KRT19
	MS4A6E	CYB5D2		RRAS2
	PLCXD2	YIPF2		ILDR1
	TFEB	POLE2		MAGED1
	MIPOL1	TRIM59		GPR4
	CRYBB2	PPP1R14A		ZNF330
	LCN12	CX3CL1		MAGEL2
	SCNN1D	HPS1		IGSF21
	UNC5D	SMC3		ULK2
	USPL1	RIPK2		ZNF90
	PCDHGB6	KCNQ1		CLDN20
	PDK2	ELOVL3		LARP6
	TNIK	C1orf61		PADI1
	RB1	COL14A1		VKORC1
	PRKD3	ZDHHC18		WIPI1
	PRKAB2	LRRC42		VPS13A
	SAMD12	MB		SLC1A2
	CD28	IRX6		SPHK1
	MAN1A1	PUS1		SLC45A1
	TRIM38	SSNA1		THBS3
	SP100	PTPRN2		NID2
	ZNF605	UTP15		C6orf15
	GUK1	ATP1A3		LRP12
	GIPR	SULT1C2		GDF6
	MSI1	ZNF287		AVEN
	TBC1D8B	TMBIM1		ABHD3
	JAZF1	FDX1		ABCA2
	EMX2	CDC5L		IDI1
	MYO18A	ARID5B		IBTK
	CCND2	UBAP2		SH3PXD2A
	PSMB10	RFC3		MARCKS
	SLCO1B1	DUSP9		TGFBI
	RNF32	RBPMS		PLCD3
	BMP2K	NFIB		PHIP
	EDEM1	DPY19L2		IRAK1BP1
	MAFB	ZNF493		GGCX
	CD200R1	PPIL1		LZTR1
	SIRPG	ACACB		ZNF703
	ATP10D	CACNA1I		CACNA1D
	MT1JP	CTSG		CCDC12
	MTHFD2L	PSG4		ADAMTS2
	TOR1AIP2	ZNF608		FMO1
	TTC8	APBB3		PCP2
	SOX4	DES		SLC16A11
	ARHGAP18	BMP4		ZNF552
	C12orf54	GEMIN6		MICAL2
	PTPRC	FOXQ1		TNFSF15
	CNIH4	SDCCAG8		LIAS
	IRF6	ANGPT1		FKBP7
	TBC1D10A	ADH1B		CLEC11A
	SLC28A3	LPL		NXT2
	EML3	ENAM		GALNT1
	CD300LF	RAB11FIP2		ISOC1
	CDK5R2	MYH11		CDH2
	CD7	ISCA2		MXRA8
	P2RX7	CAD		NR0B2
	PLEK	SAGE1		COL1A1
	GGA2	ACSM1		RCN1
	MMP25	ZWINT		CSMD2
	GLRX	MSLN		SPSB4
	TSC22D2	DHFR		DIO2
	RAB26	ACSL5		CBR4
	HAVCR2	GPR27		SYN1
	P2RY10	SSX5		GNMT
	SLC7A10	CCNF		XYLT1
	IRAK2	FAM111B		C10orf55
	TIFAB	GNPTG		ELOVL2
	TNFSF8	DEPDC1B		PSMA5
	ETV7	CEP68		MDFI
	GYG2	TCF3		VSNL1
	ZXDB	PPARD		SMPD2
	HLA-DQB1	SCARF1		LEF1
	GPR18	ING4		MDGA1
	CPVL	RBBP8		KPNA5
	SMCHD1	EPHA4		BOC
	SMPDL3A	TCEAL5		RALB
	CHKA	CORO1B		CST1
	ZDHHC13	STIP1		SV2A
	UBE2L6	RCOR2		HOXD9
	PARP9	MT3		C1QTNF1
	HEXA	PSRC1		C11orf54
	C7orf31	DAPK2		MEGF10
	PNRC1	AQP1		ABCB10
	ZNF77	ANKRD37		ARFRP1
	STON2	SLC16A7		VEGFC
	C21orf91	SLC44A4		ITGA2
	KCNH2	SOX14		SLC4A5
	KCNS1	ZNF239		BNC2
	CHD1	PAX9		UNC5B
	NIPSNAP3A	PRDM5		ABCC6
	PRAM1	HINT1		CTSK
	TCEA2	UCN		KRT6B
	SLC29A4	RPUSD1		MRO
	SAMD9L	NOSTRIN		COL8A1
	DVL1	ABHD8		CPZ
	SH3RF2	F7		KRT17
	KCNJ2	ZMAT1		ADAMTS6
	NFATC2	XRCC2		AADAT
	SLAMF1	ZNF257		BNC1
	MAPK8IP3	CYP4Z1		UNC13B
	NME7	ACTN2		ETV6
	MAPRE2	ATP7A		GPR1
	HRK	CAB39L		NPPA
	TLE6	PRAME		C5
	BBC3	MAP6		SYTL4
	IL4I1	GABRB3		IER3
	KIFC3	CD81		GADD45A
	CEACAM4	CHI3L2		FOSL1
	GAS2L3	ZNF585B		MMD
	CASQ1	C19orf48		CATSPER2
	SLFN5	LEMD1		TTYH3
	PLCB3	RNASEH2A		KCNK2
	CD58	ABLIM1		SERPINB7
	HSPA1A	RRM2		GABRD
	PSME2	LSM7		STK38L
	ADPRHL1	RPS6KB2		DUSP7
	EHD1	WDR12		PDLIM4
	NAGPA	CRABP1		PDLIM7
	ADORA2A	PTPRN		SLC39A14
	LRCH4	ZNF138		COL4A2
	GPNMB	SDSL		SMTN
	IFIT2	RAB6A		PHLDA1
	HOMER1	CLDN2		S100A2
	SYPL1	TAF4		TPH1
	SLC22A18	RNF157		PLAU
	CHST10	FSD1		ENPP1
	TASP1	ECHDC2		MMAB
	CNGB1	CFD		DUSP16
	ZNF354A	HMOX2		HIVEP2
	SLC37A1	TTYH1		TNFRSF21
	DGKA	AGPAT5		AGA
	KMO	GRIN1		ADAMTS5
	CMTM6	ACD		ANTXR1
	ZNF721	PCM1		ALCAM
	ZMYND15	POP4		TPM2
	PFKM	MUC1		ZNF667
	MBTPS2	RTN4RL1		PDGFRL
	TMOD3	CRYL1		APOM
	SNX16	RPS15		OSR2
	GUCY1B2	YARS2		ALPP
	NCF4	C12orf45		AEBP1
	DUSP2	PGK1		PI15
	IL26	EIF1B		CYP26A1
	TTC7A	POLR2J		BCAR3
	BATF	MAP1LC3A		TWIST1
	MBNL3	PSMD11		ITGA11
	IKBKG	CPA4		CASZ1
	ZNF677	TMEM98		MYLIP
	BRI3	SLC34A2		ABHD14A
	MBP	FAM110C		RUSC2
	RAB37	SACM1L		GSTA5
	EAF1	MAML2		PORCN
	SNTA1	COCH		LRRC17
	GBP4	DIP2B		ZNF469
	HCN3	CPNE2		FAM20C
	SPRED2	CKLF		C11orf65
	SLC16A9	POLRMT		SPRR3
	CTSW	PPP1R14C		HIF1A
	FANCF	ATF2		GJA1
	AXIN1	LRRC45		TARDBP
	GBP1	FGF2		MMP16
	PROK2	XPO5		RBP1
	OVCH1	CST4		PDPN
	APOBEC3F	ENPP5		MT1X
	GALNT7	FUCA1		COL22A1
	GNRH1	ADCY5		POSTN
	ARHGAP25	NCAPG2		CRAT
	EGFR	MRPS18A		SACS
	TMEM71	FEM1B		JPH1
	TXK	OR7A5		RAB23
	APOC2	MRPL51		ROR2
	G6PC3	IFRD2		SERPINE2
	C15orf48	NMNAT3		CALU
	FES	ITGA3		MMP1
	PPP1R16B	PNPLA2		APP
	PIK3CG	ZNF543		RAB11FIP5
	SPRR2D	SHMT2		COL9A2
	OAT	TMEM14B		KBTBD3
	SLC23A3	DRD1		ACSS2
	PQBP1	TK1		ZPLD1
	UNC93A	SLC5A11		MSC
	IFT88	ZBTB16		KDELR3
	PDE7A	OR5P2		POLR2C
	ARSH	CBLC		ZNF24
	CACNB3	FBXL17		METTL7B
	CLIC2	USP47		NEDD4L
	PIK3C2A	MRM1		DDIT4
	KLK5	MBIP		TNFRSF1A
	LRRC2	NUP54		MAP3K13
	ZNF614	CENPJ		C10orf95
	MNDA	PGM2L1		CASD1
	CD68	TLE3		SAMD14
	UMOD	GTPBP10		ARHGDIA
	HS6ST1	WDR74		ITGB3
	NKG7	TPTE		THBS2
	CTSD	FOXB1		TRIM6
	FOXC2	ABCC10		RPLP0P2
	GPR84	GMPR		CD99
	CCR4	KLHL15		TWIST2
	ACP6	TBC1D22A		NRIP1
	TRIM69	SOX13		FHOD3
	PLXNB1	PIK3C2B		RABL3
	RASGEF1C	C17orf80		ABCC4
	MSR1	LMO3		CNTROB
	LAIR2	GSTM4		DMRT3
	GUCY2D	TBRG4		NOX4
	DOK3	TTC14		TPST1
	HLA-DPA1	CA12		LTA4H
	FNBP4	KCNJ13		PJA1
	TRAP1	ADRB2		MYO6
	FCGR1A	AHSA1		GUCA1A
	BCKDHA	QPCTL		TIMP1
	PADI2	MGLL		CNDP2
	KLHL6	ATP1B2		SLCO4C1
	ZNF10	CBS
	KLRC3	GTF2IRD2
	PEX1	NKX2-8
	NAALADL1	ZBTB20
	ARL6IP5	EEF1A2
	F13A1	SYT12
	GRM4	QSER1
	CDKN1B	KLHDC4
	POGZ	FAM50A
	TMEM9	PTCD2
	CCDC6	SCARA5
	GOLGA4	SCARA3
	ZDHHC1	ANKRD10
	KCNC3	STRAP
	CAPZA2	MINPP1
	BFSP1	LBX2
	ANKRD9	RAB3B
	ITGAE	ASPM
	TMEM186	PHF21B
	SFMBT2	DBI
	TM4SF19	FBXO8
	PF4V1	SERPINB5
	KRT10	ZFP64
	MYEF2	STX1A
	RDH10	PRIM1
	DAPP1	SYNJ2
	VPS18	GSPT2
	CAMK1	PAQR4
	MAP4K1	DISP1
	GFI1	BAK1
	MCF2L	NUP35
	CPLX1	MYO5C
	CD2	CDC20
	NT5C	CINP
	KCNQ4	HERC1
	ST8SIA4	ANKRD50
	MYCN	SBSN
	FGR	LHX1
	MYO7A	MID1
	MAP4K3	ZNF181
	PARP8	ZSWIM6
	TRIM52	PEX11G
	HERC3	HAGH
	KIAA0895	AZGP1
	BDKRB1	ANKMY2
	DNAJB2	PLXNA3
	OTX1	CCT6A
	GHRL	TOLLIP
	CD247	SLC12A7
	PPARG	MGAT4B
	ADAM28	KHDRBS2
	B4GALNT3	EDA2R
	CD80	MCM6
	ARHGEF6	NDUFB3
	NIPA1	MCM7
	SPRR2F	DTNA
	ARHGEF5	MBNL2
	PERP	HHAT
	WDR6	LSM2
	LTA	TRAIP
	FRMD4A	UPK2
	AMACR	DNAJC4
	TEAD2	KIF4A
	KHDRBS3	ZYG11A
	PDCL	NOLC1
	MS4A4A	SYTL1
	MAPKAPK3	ACOT7
	RAB12	TACC3
	NEB	PANX1
	ETV3	ARNT2
	VIPR2	CCDC9
	FBXO46	RPS23
	TRAT1	OPN1SW
	GSTK1	ZNF415
	PYGB	PTN
	IFIT3	SELENBP1
	PDCD1	POLD2
	GPR132	IGF2BP3
	ZBTB41	NDUFA13
	LMO1	PRPS1
	MX2	FNDC3A
	EPN3	AKAP8L
	PHKA2	PRR11
	IL18RAP	TTF2
	CSTL1	MOV10
	VPS37D	GPR37
	FAM111A	TMEM37
	ZNF121	IFNGR1
	MFSD1	CYLC2
	SEMA6C	SEMA4C
	BCOR	ZNF695
	VIM	NFE2
	OXR1	THBS4
	STAT5A	POLD1
	PNMA5	ZIC1
	KIAA1522	SLC30A1
	ZMPSTE24	TCEAL4
	TAGAP	PBXIP1
	SCNN1A	ZNF414
	AGTPBP1	MYO1B
	GCNT1	TFDP2
	ANXA2	ZNF341
	CLDN9	TM9SF2
	FRRS1	MXD3
	LST1	NOX5
	PTPRF	SNRPB
	IL3RA	TLR3
	RGL3	PLEK2
	GNLY	ANKRD13B
	PIWIL1	SRM
	TGM2	KLKB1
	PRDX5	EEF1E1
	ZBED2	FBXL18
	DECR2	HKDC1
	MIB1	ANKFN1
	SNX13	TUBAL3
	HLA-G	MS4A2
	KLHDC7B	CMAS
	IL18	ZNF610
	IL7	ASB16
	NOXA1	TIMM44
	NMT2	TNNI3
	PTPRJ	PA2G4
	SIGLEC12	GNG12
	TLN1	ZNF418
	TLR7	LRFN2
	WARS2	VAMP2
	STXBP4	FZD8
	TMIE	C8orf34
	PPIB	OSBPL1A
	TMEM54	EDN1
	LAD1	CHAC1
	FMNL3	PLK4
	IL1B	GIP
	SLCO3A1	IGF2
	FOXA1	CSRP1
	PLEKHF1	ETV5
	DPYD	LDHC
	ELOF1	BAMBI
	CXCR3	IL23A
	CLEC9A	HMBS
	AGR2	NEIL3
	AGRN	RANBP1
	ELF1	CLK4
	MBTD1	LMO4
	PRRG2	RANBP3L
	PTPN6	CTTN
	MEFV	FOXN1
	RASSF5	SERINC1
	RPS6KL1	HIC1
	DYRK1B	ARHGAP29
	WIPF3	SPATA6
	GZMM	MKI67
	C1QBP	CCND1
	CUL5	GALNT11
	CTSS	ZBED3
	ZFP36L2	MPHOSPH6
	B3GNT7	CPSF4
	BCL10	UBR1
	MYO5A	TRIM32
	RPL36	BMPER
	PPM1K	OXCT1
	IRF3	MSRA
	LYN	CELSR1
	C2orf15	ATG4D
	VTN	BAX
	SYNPR	WNK1
	MAP3K5	ZFP2
	GPR82	DNAJC15
	SH2D1B	PPP1R3C
	ZNFX1	GSS
	FAS	ZNF442
	SRP9	ZNF8
	IGSF9	CDC25C
	PEX11A	STK32B
	GPS2	NPY
	TBL3	COBL
	SEMA4D	NTN4
	BIRC3	ST3GAL5
	CD160	MAD2L1
	LLGL2	BCR
	TGFB1	XYLB
	DLK1	CHRNA9
	RHOD	TFAP2A
	FAM102B	CALR
	PRKD2	AFF4
	PLS1	GAPDH
	C16orf54	NME1
	CCR6	ESPL1
	ZNF426	CPEB2
	CASK	CAPNS1
	TAOK1	IRX4
	PHF10	FIGN
	EPS8L2	KREMEN2
	GABRG3	PPAT
	MAP3K1	PLD1
	KLRG1	IER5L
	ZNF134	RNASE10
	MPST	HELLS
	LTB4R	FCGBP
	SPRY3	ZNF526
	ASPHD2	SLC25A34
	NPL	CORO2B
	LRRC57	DONSON
	TAF1B	AVPR1A
	PLEKHH3	GLO1
	CDC14A	GRIN2D
	GEMIN8	SHE
	CPSF6	MRPL39
	PPM1M	DTX3
	MED25	PCDHB4
	SOS1	SCG5
	CIITA	XPOT
	NEFL	AQP6
	HSPH1	RDH13
	BDKRB2	VSIG8
	MITF	GYS1
	ZNF382	VEPH1
	C1orf53	SEMA6D
	WDR60	FIGNL1
	TNFSF14	BBS4
	ELF3	POP1
	COMMD10	PHKB
	TMC8	RASL11A
	HEXIM1	CDC7
	ISG15	USP14
	TMF1	PALM
	CAPN14	EBP
	ALPK3	BLM
	ZNF253	MACF1
	KCNA3	BRMS1
	IL13RA1	ARMCX1
	ARVCF	SYMPK
	SIPA1L3	TBC1D17
	EEF1B2	CCNE1
	HDAC8	DGKH
	VAV1	STT3A
	TM7SF2	MRPS2
	PCK2	CHMP5
	SAMD3	IVD
	VAPB	SMC4
	PKIA	RPL12
	TAP2	FOXF2
	HECA	TOMM40L
	PXK	ZNF347
	ZNF420	FGF13
	HIBADH	STYK1
	CYBB	SLITRK5
	ETV4	TRIM36
	TAPBPL	CDC42EP4
	C11orf45	MYBL2
	TRPM4	CTTNBP2NL
	SUMF2	FTSJ3
	PCDHGB2	PKP3
	ATXN7L2	MED19
	SCAP	MTUS1
	TMEM53	ALOX15B
	NMNAT2	QTRT1
	CWF19L2	MEOX2
	ZNF597	EIF4EBP1
	JRKL	SRPK1
	SCGB1D2	MLF2
	NINJ1	UBL3
	C6orf136	PPP1R1C
	BAIAP2L1	PMM2
	PNN	CRYAB
	HIBCH	STEAP4
	ZNF454	KCTD16
	RORC	RPL35
	HAPLN3	HMCN1
	TUFT1	CDH24
	LAT2	FOXI1
	HDHD3	SORT1
	CSF2RA	ASNS
	KCNH3	CCDC68
	ASPSCR1	CASR
	MRPS21	ADRA1B
	CD209	MALAT1
	SLC2A4RG	ATOH8
	IGSF1	DAAM1
	CD8A	NEIL1
	ENPP2	GUSB
	RAB33A	STAT6
	FXYD5	ZNHIT2
	CDK10	CLGN
	PITX2	TLL1
	PROM2	HSPB6
	CD5L	SCAMP4
	ZNF629	FAM107B
	IRF2BP1	LRIG3
	OAS3	MEN1
	MAST1	CKS2
	DKK4	SRR
	PIK3AP1	SERPINA1
	STAT4	SMU1
	GRHL2	DCP1B
	WSB1	PPIH
	ACO2	MAGOH
	OAS2	CHCHD2
	SIGLEC9	PYGM
	FBXL20	LRRFIP1
	MVD	KIF2C
	STRBP	FMO4
	FADS6	HES4
	FGFRL1	LSG1
	ZKSCAN1	ARTN
	PLA2G2D	ATG9B
	OSBPL3	CDH20
	EPB41L1	AP2A1
	TSPAN15	MRPL11
	DBP	NEDD9
	RPS4Y2	COX7B
	DENND2D	COL9A3
	ZNF626	UNC13A
	SETD1A	RIF1
	OSCAR	GBA2
	RHBDL1	LBP
	PASK	FCHO1
	ZNF232	INMT
	PCYT2	ATP8A2
	ZDHHC17	CLK1
	MYBPH	MRPS15
	RABEP2	C8orf31
	SLC25A1	SLC26A6
	SLC26A4	PER1
	RPS9	MAN2A2
	PBOV1	WDR53
	RHCE	LAMB3
	ZNF444	GSTA4
	AIP	EXOSC5
	ABCB1	NAALAD2
	CDC42BPB	DIRAS3
	GLCE	NFKBIB
	KCNK1	MID2
	PILRB	WSB2
	ADA	SYCP2
	IFI27	ZNHIT1
	XK	ANGPTL7
	ATP1B1	ZNF302
	IGSF3	CEP72
	WDR24	ARHGEF12
	RNF39	GNB1L
	CHRNA3	SLCO6A1
	ZNF226	SWAP70
	ATP6V1B1	PPM1D
	SYK	MRPL28
	PLXNB3	NINJ2
	GCAT	LRRC59
	SELPLG	NUP205
	ARHGEF3	SLC39A7
	ELMO3	TRHDE
	CSF1R	NRAS
	BCORL1	RFC4
	SORD	CA9
	SLC17A7	ADH5
	ZNF320	COL4A5
	BACH2	MOCS1
	ZNF34	B3GALT4
	MRAS	GPR137
	LILRA4	MTMR6
	GLRB	TNFRSF10A
	ARL4A	PTDSS1
	RBM12B	FXYD1
	RCBTB2	SCNN1B
	RND2	CLN5
	HCN1	TSFM
	TMIGD2	RAB11B
	GLS	MYL5
	FGL2	TRMT1
	SRGN	KLF2
	EFNA1	RAD54B
	INHBB	CCNA2
	CXCR6	PCDHB7
	ABHD6	TRUB2
	CD9	SHOC2
	C12orf4	UHRF1
	CHST11	CSAG1
	DAG1	MAOA
	GDAP1	SLC9A3
	GPT	SUV39H2
	PELO	DRD4
	CEP57	CHAF1B
	SLC37A2	ABCC5
	GLYATL1	CERK
	ZMYM1	SENP5
	CACYBP	POLA1
	ZBTB38	LOXL4
	NR1D1	HPCAL1
	ZHX1	SMUG1
	KLK6	DUSP27
	PTGER4	TRIP13
	ZIK1	GATA5
	ICAM3	DUSP6
	LDB1	SLC25A10
	ITGAX	ARL9
	CYB5R4	PLCB4
	CAMP	TAF6
	APOBEC3D	MTHFD2
	HDAC9	SLC25A13
	PLEKHG2	AP2B1
	RTKN	PIGR
	YES1	ITGA7
	LMBRD2	CDC42BPG
	CCL20	CDH3
	PDCD1LG2	DTYMK
	RNF113A	TRIB3
	RWDD3	PHF5A
	C1orf162	ANKRD24
	ZNF175	CCNG2
	GRIK3	ZDHHC15
	IL10	COX6B2
	ACRBP	PGC
	MFAP1	KCNS3
	RAB8B	GNRH2
	SPIB	RHPN2
	CNKSR3	RPL27A
	ANGPTL3	GPR39
	OBSCN	CSE1L
	INPP5D	TMEM87A
	PRPH	HMGA2
	KIAA1549	TAF7L
	PTGS1	CRIP2
	PPM1E	E2F8
	TRIM21	E2F2
	OCA2	VRK2
	CLSTN3	GRIA1
	PLA2G4D	HOXA13
	ERGIC1	TMEM132A
	GMFG	KIF11
	PADI4	CCDC28A
	HOXC9	WDR81
	RIPK4	PRMT1
	DNM2	TMPRSS11E
	AMPD3	CCNG1
	RGS6	NR2F2
	HIC2	COL4A4
	SPINT2	AGXT
	CHMP2A	ACOT11
	SOD2	OSMR
	HSD11B1	DUSP14
	CCL23	PCDHB12
	MSN	TYRP1
	PCDHGA6	ARRB1
	SLC29A3	MAPK8IP2
	ASH2L	ADRM1
	ZDHHC9	ATP13A4
	VAX2	SNHG3
	CYSLTR1	FLOT2
	ABCB8	DNAH5
	DLG3	SRP54
	GREM2	C1QL4
	BRSK2	TGIF2
	FBXO30	FRAS1
	SAMD13	ZNF562
	MGAT1	ARL5B
	SUPT5H	TBC1D10B
	CCT2	DPH2
	CFHR3	PSMD14
	PIK3CD	PSMC4
	UCP2	JARID2
	TIGD1	AASS
	FOXP3	ITIH3
	THEM5	CEACAM6
	GCA	RORA
	LPIN1	CLCN2
	GOLT1A	EXO1
	RBM10	CACNA2D3
	SNX8	MAPK12
	LRP4	RECQL4
	MYO1F	SMG1
	SIDT2	ADI1
	IMPA2	FOXL2
	USP43	AP1S1
	BLCAP	PCDH9
	MUTYH	SNURF
	OTUD3	UNC119
	GALE	TOB2
	GMIP	NAPSA
	NUDT13	EXPH5
	NDUFC2	ABCD1
	PRRT3	RUVBL1
	GLT1D1	CA1
	KLRF1	SLC25A23
	CD72	PAPSS2
	VKORC1L1	SLAMF9
	NCR3	KRT8
	CLEC4C	MRPL34
	CEACAM21	MORC3
	ST8SIA1	ADRA2A
	SEZ6	SMARCA2
	STX16	G3BP1
	IL17RC	ACSL4
	CBY1	PRELP
	MAP3K14	TOM1
	ZNF235	CD1E
	CHD6	SLC11A2
	TRAF1	HGFAC
	SOX6	EZH2
	CCL1	SKIL
	PLCL1	HMG20B
	CHERP	DNTTIP1
	BNIP3	CITED4
	TFB2M	DTX2
	IL2RB	LMTK3
	STK36	MAD2L2
	ZNF671	PPP5C
	HOXC4	DYRK3
	IDE	SULT1A2
	OGFR	SEC14L2
	HSPA1B	ZNF559
	PNPLA8	RRAD
	HCK	IDUA
	TEAD3	RPS27L
	RTN4R	SDK2
	PAG1	DDA1
	SHMT1	LSM3
	FASTKD2	PLAC8L1
	RAPGEFL1	TP53RK
	C3AR1	BFAR
	DLX3	FOLH1
	ATP8B4	EHF
	PCDHB13	GGT6
	EPHA10	FANCB
	REXO1	POLE4
	FOXN4	DUSP26
	ATP6V0C	FER
	CRHBP	RPL23
	KCNN2	DNAJC18
	TPD52L1	PIK3R4
	ARSB	DLX1
	KLHDC8A	TMEM79
	ZNF516	KLRG2
	ARHGEF19	DEFB1
	ERC1	PADI3
	ALK	KCNQ5
	CLIP1	ASPH
	ITGB7	ZNF404
	CH25H	ZNF185
	TXLNB	DENND2A
	HPSE	SNRPA1
	SH3YL1	UCKL1
	SLC35B2	DDX27
	SOAT1	RHCG
	BTBD3	DDX49
	DLG5	NMU
	PDE1B	AMIGO1
	ZNF223	ETV1
	GBP3	CHCHD6
	CAPN1	MAGEH1
	AP2S1	NAT9
	AMFR	REM1
	SH3BGRL3	GRIK5
	PRSS27	PDE8B
	SLC9A9	IRX3
	ERF	PGR
	ASH1L	PVT1
	CDKN2C	RASGRF1
	MATK	RGN
	RAB24	ZNF628
	DISP2	SLCO2A1
	NIPSNAP1	OR7E91P
	CCRL2	ALPL
	HCN4	CDH18
	STRN3	TSPAN13
	SIGLEC8	C1orf198
	IFI35	STMN1
	IGF2R	MRPS30
	NTHL1	SLC35D1
	DLGAP1	SLC5A6
	RSAD2	NEO1
	PLEKHG3	SLC26A9
	FLNB	ABCA6
	TM2D1	TP53I3
	LRCH3	BMX
	GNAL	DR1
	YOD1	CHTF18
	NBR2	SLC25A22
	GNAT3	IDH3G
	ZNF432	C19orf25
	DOK1	CLPTM1
	RYR1	PKNOX2
	SPN	PGAM5
	TNFRSF10B	DTL
	BTN2A2	MTSS1
	MAF	GCG
	LPXN	PPP1R3E
	ELL3	NOL6
	C9orf72	LLGL1
	PACSIN3	SLC43A1
	CD14	KIAA2026
	BLK	ZNF91
	ATP6V0D2	TOPBP1
	SEC23B	AK1
	RPL13A	WNT11
	PSD3	RIMS4
	GSN	MYO9A
	NLRP3	TMEM102
	DUSP8	KIF5B
	PTPN7	INSL6
	APOA2	UBE2C
	TTC7B	UHRF2
	EPS8L1	POLR1E
	GRIN2C	NPM3
	IDS	CDCA5
	ZNF43	TTYH2
	SCHIP1	CACNA2D2
	GDPD1	KLHL17
	MANEA	DERA
	TOM1L1	INA
	DCAKD	PACSIN1
	DAB2	EFNA2
	CD3E	MAGI3
	TMPRSS13	KIF7
	AIF1	PRPS2
	MINK1	LDLRAP1
	APOA1	MTM1
	ADCY7	NDUFAF1
	RPS28	SVIL
	GPR174	CLCN4
	GRB7	MARCKSL1
	RAB18	SMARCD3
	ENDOG	GPD1
	SQLE	UBE2O
	CHCHD5	KDR
	TRAF5	C1orf74
	USP46	GSTCD
	KLRD1	LSM4
	KIF21A	TIMM8A
	LPIN3	CKMT2
	TACR1	RAVER1
	NCKIPSD	ARMC5
	SIX2	ZNF93
	HABP4	DOK4
	RBP5	ZNF525
	FBXL2	ZC3HAV1L
	PRCP	RIMS3
	MEGF8	CDCA4
	PDE9A	RDX
	NBN	CTSH
	TBC1D10C	FLRT3
	LMBR1	FRMD4B
	SPOCK2	CEP250
	SETX	PPFIA2
	FCAR	TIGD3
	PTDSS2	CYB5R3
	TCIRG1	CPA6
	PTK6	ARSA
	NLK	CABLES2
	SLC25A29	CPB2
	GFER	KCND3
	LGALS12	NR3C1
	SH2D1A	FILIP1
	DLL1	ABHD12
	STK17A	PYGL
	GPSM3	MPP6
	ZNF430	RABGAP1L
	WDR31	SMAD7
	YTHDC2	KPNA2
	NT5M	RRM2B
	PLA2G2A	ARL6IP1
	ZNF101	EEA1
	FMNL1	PNMA2
	KCNMA1	BRCA1
	ARHGAP9	VANGL1
	GFAP	IL11
	DENND1C	SLC25A40
	OAS1	GABBR1
	CBLN3	CRYGN
	ZNF717	PSMD2
	AFMID	PEG10
	PRKCI	MCC
	IL10RB	REN
	WRN	AMT
	LHFPL2	SDC1
	RASGRP3	RAET1G
	ANKRD12	CD55
	DLD	USP5
	DPEP2	SLC41A2
	PPP1R9B	ZNF429
	NAGLU	KLC3
	IGSF6	PCYOX1
	ITGB2	DAB1
	SLCO1A2	WFDC2
	SCARB1	CTTNBP2
	SNAI3	CCDC15
	CRTAM	MRPL36
	TNC	AHRR
	GPR3	PIGQ
	IQCC	WWC2
	CASP5	KIAA1586
	MYOT	PLXNB2
	ADCY3	TFPI
	CYP1B1	SPATA13
	COX6A1	COL4A3
	CDK2AP2	ZNF480
	SLC8A1	SLC9A3R2
	YEATS4	SMC2
	DLX4	NOL9
	CCDC57	MELK
	LCP1	C3orf18
	CHMP1B	SYNE1
	FGD3	NUDT19
	PARD3B	HAS3
	CD22	FOXD3
	PARVG	C19orf33
	ABCG1	NETO2
	RANBP6	APH1B
	BTK	DHRS7
	PLEKHA8	TRIM15
	SLC16A6	ADAMTS1
	SERPINB9	CGNL1
	CCR1	NFIC
	GDPD3	RIMS2
	FNBP1L	C1orf127
	SERTAD3	ABCC3
	CBX5	APCS
	PIP5K1C	FOXM1
	DCXR	AURKA
	OXCT2	CDK5R1
	RHBDL3	IL13RA2
	EBPL	ZNF165
	RASL10B	ATIC
	C1orf54	KRT9
	ZNF749	NDUFS6
	DHRSX	SERINC5
	GAS8	CYP24A1
	MT1E	IMPDH2
	PRDX2	CNR1
	SAMD4B	TYMS
	BATF2	GLDN
	APOL4	PDXP
	MLKL	SGPL1
	ZNF692	GPKOW
	NT5C2	PFKFB4
	PTK2B	COPE
	GNS	LRRC36
	LAPTM4B	NISCH
	ADAM15	SYNGR4
	BCL2	MAP2K3
	ITPK1	HPD
	PHTF2	LBH
	PRF1	AKAP13
	GNG2	ADAMTS16
	U2AF1L4	ABCA9
	VENTX	LZIC
	LZTS2	HDAC5
	TTC6	HMMR
	PIM3	ASMTL
	SLC38A6	ZFP36L1
	SLC4A7	BICD1
	RPS18	TOMM22
	MYCBP2	GPR158
	KEAP1	DDX54
	WNT4	SCNN1G
	ROCK1	TROAP
	ABLIM2	LRRC55
	C1QA	MGAT5B
	TPST2	STARD3
	PLCL2	FANCD2
	TBC1D1	TSPYL4
	ZNF117	ANAPC7
	AGTRAP	ADRA2B
	SLC25A18	DDX10
	FBN3	ECT2
	ESR1	UST
	SIRPB1	MPP2
	MAN2B1	HDC
	SEZ6L	SFPQ
	CLEC4E	HSD17B6
	CHRNA6	BRD9
	KLF12	TMEM65
	PVALB	GNL3
	AP1G2	TFDP1
	CXCL11	MGMT
	TRPM6	RPL32P3
	GZMK	ZNF233
	RAG1	CRLF2
	RTN1	PBX2
	TLR1	CREG2
	BANK1	FMR1NB
	CLEC2B	DLX2
	ATP4B	TTC17
	PSMB8	AHCY
	RAPH1	ZMYND19
	DCK	MEST
	MESP1	WDR13
	MCOLN1	CYB5R1
	WNT9A	PRKCE
	FOLR3	NUP155
	ZNF14	PRDM16
	KLC4	DDHD2
	TMC4	PLXNA2
	S100B	SLC1A1
	SLC2A6	NR1D2
	CLEC4A	DBF4B
	NAV2	DLEU1
	DGCR2	CYP17A1
	SYT5	STEAP3
	KIAA0753	EMID1
	PXMP2	MYH10
	PTPRO	ABCA8
	NOL3	NEU1
	ALOX5AP	HGF
	CSF1	NUDT5
	MYO1D	PGM5
	LCMT2	SLC16A5
	SOCS7	ALG14
	CDC42SE2	SLC29A1
	MCTP1	GEM
	ZNF100	HFE
	DHRS4L2	STOML1
	RHBDF2	IGFL1
	ATF7IP2	SH2D5
	KCNB2	HMGCS1
	KIAA1217	VAV2
	PHOSPHO2	DDX17
	PTAFR	TPI1
	GOLGA2	SRMS
	CDC42EP3	TAF13
	PCSK4	DHRS3
	ADAM9	WASF2
	SECTM1	PLEKHJ1
	MAD1L1	CAPN13
	S100A8	PNMA3
	GOLPH3L	XPC
	PARD3	SEC61G
	GPHN	GSTM5
	MPP5	LRRC4B
	ZDHHC19	KRAS
	CCR2	SNORD56
	NPAS2	B4GALT7
	PAF1	PNCK
	HLA-DRA	MAGEC2
	PAXIP1	SURF2
	NARS2	CLDN12
	DTX1	DMD
	DNAL4	PAICS
	NEFM	EEF1A1
	CCL25	NPR1
	FAM53B	BIVM
	LIPA	DSG1
	SKAP1	ADRA2C
	TMEM51	NDUFA9
	BTN3A1	SALL3
	RASEF	ARHGAP27
	SEMA4F	RAD51AP1
	CCDC69	ALKBH2
	MRC1	GTF2H5
	IFIT1	VRK1
	LRRC8D	ZNF367
	PRR3	PSMD9
	RASGRP1	CD3EAP
	NF1	OVOL1
	DHX32	EMG1
	RNASE6	MC1R
	BST2	KCNG1
	CSTB	TBC1D23
	ZMYM2	NHS
	EVL	E2F7
	PCDHB19P	ZNF300
	AKAP1	CTAG2
	ACAD10	CENPO
	TMEM45B	CMA1
	WTIP	LAMP1
	CD83	HLA-DQB2
	SUCLA2	TSC22D3
	BDP1	NOD1
	ELAVL4	DLC1
	MYO10	UMPS
	PAPLN	SLC10A2
	CCNH	CDKN3
	ATP6V1C2	USP28
	C8G	PARP3
	SNCA	CHAF1A
	STARD3NL	SLC27A5
	MAN2A1	THAP8
	SERPINB1	KPTN
	TIMM17A	PRTFDC1
	GRIA2	ZNF208
	PIAS3	ABHD14B
	LNX1	C14orf28
	PANK1	PLD5
	ADAM10	PELI2
	DDX25	AXIN2
	MRPL1	CADPS
	PAK6	TKTL1
	PEX6	LENG8
	DPY19L4	FCER1A
	CYFIP2	RAB9B
	SLC1A3	TNFRSF19
	HAAO	AOX1
	IL18R1	CDT1
	CYSLTR2	POU4F1
	GIMAP2	CASQ2
	CCKBR	TDP1
	FCGR3B	PTTG1
	GAL3ST1	KHSRP
	TRERF1	YBX2
	CHRNA1	ZNF572
	RAB40C	RANBP2
	FAM53A	DHRS1
	KAZALD1	ARHGAP11A
	TNFSF9	LRP2BP
	HLA-E	CASP14
	LSR	GPC4
	HSBP1	NFE2L2
	RIN3	ADAMTSL2
	PDIA2	CLIC3
	CNIH2	GLDC
	BTBD6	STS
	PPT1	ZNF492
	SOX3	CYP27B1
	VASH1	LSM12
	ACE	CACHD1
	MKS1	NPC2
	DNASE2	TCF19
	ZNF160	SPTB
	PLEKHG6	ENPP4
	TMPRSS11D	ANGPT4
	FDXR	OXER1
	PPARGC1B	KLHL26
	PLAGL1	RAD51
	ARRB2	FHL1
	FAM41C	NANOS3
	TANC1	USP31
	CGN	MAZ
	TNF	TUBD1
	SLC7A7	FAT4
	ACACA	TFPT
	IMMP2L	ZC3H12B
	KCTD17	NXF3
	CCNB1IP1	AMH
	CLEC7A	ACBD4
	CLEC6A	CCNB2
	IL5RA	EHHADH
	TBC1D4	HHLA2
	KPNA3	KNTC1
	SYT14	PIF1
	ARHGDIB	RAB9A
	FRS2	LCTL
	SLC2A8	LMO7
	NOVA1	ENPP3
	TNFRSF8	RHOV
	HLA-DQA1	SNAP91
	CD300C	CHIA
	SARDH	INTS1
	TFRC	RPL36A
	CD3G	KRT18
	CCL2	ZNF570
	APOBEC3A	TDRD9
	ABI3	RNF180
	ITM2A	DOK6
	IFITM5	C4BPA
	IRF7	MFAP3
	GNA13	STAC2
	TFAP2B	THAP4
	COX11	IRF2BP2
	LIME1	CDYL2
	CPB1	DUS3L
	APOL1	RAB27B
	MYO1G	SRL
	PFAS	LEPR
	ZRANB1	PURA
	TLR10	AGMAT
	COL27A1	UTRN
	HOXC12	KIF23
	ADCK1	CAMTA2
	RASA2	GMPS
	SLC4A2	HABP2
	NPM2	RFXANK
	NPB	RNF128
	ETFB	HOXA10
	FMN2	LRFN5
	GPR141	TERT
	TMEM86A	UTP20
	CMTM7	RPS7
	ZNF227	XRRA1
	COG6	TRIM47
	PARP15	NDUFS5
	KTN1	SLC22A3
	EPB41	NUTF2
	SAMSN1	MYO3B
	THNSL1	C7
	FGFR1OP2	CAMTA1
	FBXO16	YKT6
	ADPRH	PAK1
	CD300A	HOXD1
	TNFAIP8L2	ZMAT3
	DYRK4	PODXL2
	PCGF2	SSBP2
	PTPN3	CCNE2
	AQP7	KITLG
	MT1M	SMS
	CXCL10	PAX7
	STK4	IPPK
	CCDC14	LAMA2
	IFI44L	THOP1
	TLCD1	ZGPAT
	TYROBP	NUSAP1
	PLAC8	PPAN
	CHD1L	ARID3A
	MYH14	PTGFR
	INSL3	KCNK17
	UGT2B11	POLR3G
	TRA2A	GPRASP1
	ATG16L2	NT5DC2
	CCL13	CDKL2
	TMEM81	NAB1
	RTBDN	MYH1
	ELMO1	UBL4A
	HSDL1	DPP4
	BAGE2	ABL2
	NCF1	ANG
	LAPTM5	PHYHD1
	OGFRL1	COLEC12
	PTPRK	MANSC1
	HOOK2	TUB
	ZNF33A	SLC6A17
	TAS2R5	NPFFR2
	ANKS3	PRKAR1A
	SLC35A3	BOLA3
	GPA33	PDXK
	GPR137B	ERBB4
	FLI1	AAAS
	TRUB1	GALNT10
	BLMH	USP6
[truncated: 1,360 more rows]

## Sheet: GSE41271
black	blue	brown	cyan	darked	green	greenyellow	lightcyan	lightgreen	lightyellow	magenta	midnightblue	purple	red	royalblue	salmon	tan	turquoise
DACH1	RPL23A	MFSD3	CBL	AKR1C2	RNF44	DNAH3	KCNJ11	SLC45A4	PTPRH	MAF1	CALB2	DIO1	PKP2	PDE5A	RCN3	KIAA1328	PHEX
TOMM40	SIN3B	ZNF708	ARFGEF1	ALDH3A1	MTRF1	FANK1	FGFR4	KATNB1	GLYCTK	COX17	KLK8	CD1C	MYOM2	HEY2	ECHDC3	ACOX2	PFN2
PLCE1	NUCB2	TLL2	CAND1	SRXN1	AMN	WFDC6	GC	BPI	SIM2	RPL41	KLK10	PIGA	PKMYT1	CDH6	HS3ST3A1	RNF5	HAO1
TMEM52	ESM1	IL32	SGCB	AKR1B10	ERRFI1	STOX1	SLC35D3	PDIA3	GPR35	ALDOA	SERPINB3	PAGE2	PCMTD1	LRRC32	CTHRC1	ONECUT1	FAM89B
PTPRB	NLGN2	ST3GAL6	ZNF318	CARD14	HSDL2	PRB2	ABCC8	THOC1	TMPRSS3	UQCRB	CLCA4	FCGRT	SLC2A1	USHBP1	DACT1	MYSM1	ZNF781
CLN6	FHOD1	KRT1	RILP	NUDT12	MED31	ZMYND10	PROC	ZFP28	HMGCS2	CDK8	A2ML1	ACAD8	TNNT1	ADCY4	MMP11	ZNF700	PSMB6
EPHA3	GLRA3	PRKG2	HCFC2	UCHL1	PCBP3	C1orf87	GP2	STRN4	RDH12	NR2F1	RHOC	PPT2	LDHA	TGFB1I1	BRCA2	NKTR	MTF2
LCN6	HCG27	CHN2	SLC39A10	SLCO1B3	LNPEP	EFHC1	PCK1	DGKQ	ITIH2	RPL38	XDH	PHGDH	CAPN3	KHK	MEIS3	VPS13C	RBM15B
SOSTDC1	PPOX	MT1A	FUT8	GPX2	HOOK3	SPATS1	RIMBP2	CNTFR	FOXA3	PSMB5	BMP7	EYA2	RAD54L	VIP	GLT8D2	DNALI1	DGKD
TTLL4	H6PD	GRIP1	PPP1R12A	FBXW10	ATAD3C	TEKT2	CGREF1	IFT140	ENTPD8	NDUFA3	KLK7	FMO5	ART5	PPP1R14A	COL8A2	HSPA5	TMCO1
ANKRD1	GRAMD1C	RPRM	PIK3R3	CYP4F3	CFHR2	PDZD4	UGT3A1	SETDB1	MYBPC1	RPS24	MYEOV	FREM2	PDRG1	COL14A1	VCAM1	CAMK2D	UPP1
PRG4	GLI3	KCNE4	UBE4A	CA12	WIF1	CNGA4	MTMR7	ARHGEF16	TM4SF4	RPL9	WNT7A	SMAD6	RGS20	SYNPO2	PRRX2	EPB41L5	HOXC13
NR5A2	PHLDA2	FCGR2B	RAB33B	EID3	WDR36	RBM24	KLK12	ACOX3	CYP2C18	ECE2	PITX1	C9orf152	GPSM2	CYGB	PCOLCE	NHLRC2	PDCD6
FXYD6	RLN1	IL27RA	IQGAP1	AMBP	XPO4	TEKT1	DLL3	TGM3	SEMA4G	C9orf16	TRIM7	LGI3	SORBS2	CSDC2	CD248	PCBD2	PLP2
DPYSL3	EFS	BRDT	NQO2	PPEF1	SLPI	CAPSL	RNF183	TNKS1BP1	EDAR	RPS4X	DSC3	CISH	DENND1A	ACTN1	AFAP1L2	WDR43	ASB2
APBA2	EVPL	EPB41L2	ALG5	MAP2	CEACAM19	DNAH9	AKR7A3	KIAA1109	SLC9A2	COPG2	TNS4	CADPS2	POLR2I	EDN1	PXDN	ZNF558	FGFBP1
CDO1	OTUD1	XCL1	ATP11B	OSGIN1	LRIG1	WDR63	SCG3	INPP5E	CAPN5	FABP5	PI3	RAB11FIP1	CENPE	LZTS1	TRIM71	REST	MATN3
CDH11	ZNF304	TREH	IFIT5	S100P	NR6A1	TSPAN1	TTR	LIMK1	LRRC19	DDT	TGM1	FBP1	STRA6	CORO2B	RARB	SLC22A5	PLOD1
SCN2B	CYP2E1	GNA12	RRN3	EPN3	CPT2	CCDC33	CGA	C1QTNF2	SPINK4	PRCC	GRHL3	CD1A	NEK2	LAMC3	SERPINF1	ARID4A	GALC
CRIP1	PES1	OR51E2	TBC1D9	PPP2R2C	DCP2	PTPRT	DDO	LRP5	HGD	IFT52	ANXA1	H19	FOXD1	PLVAP	HOMER3	DDX6	TSPAN19
CA4	IL12A	STARD5	HDAC2	PNLIPRP3	IL18BP	KRT4	SNAP25	NUP188	MUC12	PPIF	UCN2	SCGB3A1	PTS	ROBO4	COL6A2	GARNL3	LAMA1
SLC9A7	RNF24	ZNF551	GAL3ST4	CABYR	PAX1	SPATA18	INSM1	TRIM11	EPS8L3	ADRB1	SPRR2E	BRD1	PBK	TCF4	FAM3B	ZNF211	PRKACB
DDR2	BCL7C	OGDHL	ALDH1B1	SQSTM1	HSPA1L	TTLL10	MYO7B	TRMU	TESC	SF3B5	WFDC5	TRIM55	VIPR1	ARHGAP11A	COPZ2	TIA1	ISLR2
KLF4	PLK3	CD79B	IFT74	PRDX1	ZNF528	MSMB	CAMK2N2	OPLAH	UGT2B4	TMEM14A	CST6	LCT	RPA3	PDGFB	COL16A1	NFAT5	ADCY2
KCNA5	DOC2A	VNN2	UAP1	ABHD2	AOC2	KCNRG	AKR1C4	NUDT22	HNF4G	USF1	DSG3	SLC41A1	CARHSP1	GAS6	TNFSF4	TES	PDE1C
FGF11	ITGB6	KBTBD8	FCHO2	KIAA0319	MANBA	CTXN1	ASB4	FAAH	PRSS3	ZNF540	SLC6A8	GDA	PAWR	TBX2	OR51E1	IGF2BP1	PON1
NPR3	USP18	BTLA	PIK3CA	GCLM	CFL2	HYDIN	KCNT1	RGL2	CYP4F12	MRPL40	LY6E	SFTPA2	SLC37A3	NKD2	KIF26B	MPND	ZNF248
RCC1	GDF9	WNK4	NOC4L	CBR3	FOXL1	SPA17	PTPRN2	PHKG2	PDZD3	LAMC1	SLC4A11	SERTAD4	ENO1	STARD13	KLK4	ZNF471	POU6F1
LRCH2	MEP1A	DOCK10	LAPTM4A	ABCC2	SLC14A1	IQCD	PTPRN	ATP13A2	CLDN2	RPL13	GBP6	SFTPD	PPFIBP2	TSPAN18	SULF2	TRIM59	CSPG4
F10	CHORDC1	GABRA3	NUDCD1	PGD	NPNT	EBF3	SYT4	ADCK5	REG4	ECSIT	CORO6	EPDR1	SLC7A1	HEYL	MMP2	ZNF287	RTN2
ITPR1	SLC18A2	KCNJ5	ZNF12	UGDH	P2RY12	RFX2	ADCY5	ORMDL3	PRSS2	THYN1	HES2	FGB	NUP210	SLC44A2	MN1	TRIM61	DDX21
CYBRD1	CALML5	CRYBB1	RAD1	G6PD	BCS1L	CSPP1	THAP7	BCAP31	CYP2C9	CYP1A2	IL24	CLIC5	GAD1	CDK5	PGF	SDCCAG8	MORF4L2
CIRBP	BIN3	ABCA1	FRG1	ABCB6	GTPBP2	CAPS	SCG2	PELP1	MUC5AC	RPS15A	LAMC2	SLC6A20	RACGAP1	CNTNAP1	FBN1	SLC16A7	PTGS2
PCDH12	B3GNT4	MCOLN2	PHLDB2	SLC6A6	ZNF662	LRRC31	CALCA	PACS1	VIL1	COX5B	CLCA2	PLA2G4F	TTK	PRICKLE1	MAP4K4	HMBOX1	ZNF132
PLSCR4	SAP30	PCDHGA2	RAP1B	CYP4F11	SUSD1	DYNLRB2	CDK5R2	ZNF419	APOBEC1	SART1	KRT13	CD1B	DMRT1	TSPAN9	SFRP2	USP54	OSBPL5
FABP4	ZFYVE19	S100A12	HDAC4	FZD10	ATP8B2	CD164L2	RAB3B	SARS2	PSCA	ZNF541	LYPD3	ROS1	CTDSPL	NOTCH4	RASGRF2	PCM1	C11orf53
ELN	ICA1	DLX6	SNN	ALDH3B2	EPHA7	ZDHHC18	STMN2	SYT17	C4BPB	BNIP1	FXYD3	TMEM125	RPS6KA2	MFGE8	FRMD6	CLDN4	ZNF425
LEFTY2	TRIM25	PLP1	ATP11C	TALDO1	SLC22A15	PRH2	GRM8	HSF4	CCDC50	RPL26L1	SOX15	LRG1	CYP7B1	PEG3	COL6A3	EXOC4	SCPEP1
FBLN5	ITGB3BP	TMED6	PAPSS1	CBR1	LIPE	C10orf67	SLC35F1	REEP6	CDX2	SCAMP5	S100A7	CAPN2	MLPH	RGS2	ANGPT2	PIN4	HTR1F
RBP7	CRH	LYZ	DNAJC10	NQO1	WNT16	STOML3	RGS7	SLC25A35	PIWIL4	RNF148	KRT14	AQP4	TEAD4	FZD4	GLI2	TRIM38	NRK
TACC1	ANXA3	MBOAT1	FZD6	DDIT4L	PTPRM	MAP6	SST	EME2	TCN1	SULT2B1	DLX5	SPINK5	ITGA10	ABTB1	IGFL2	SP100	PDCD4
ATP1A2	SLC20A1	CRB3	CLIC4	EGF	SIRT1	FBXL13	TFF3	SYTL1	UGT2B7	SCNM1	DST	PLA2G3	ST6GALNAC6	MEIS1	SNAI2	KLHL15	ZFHX2
EMP1	F2RL2	SEC14L3	PHF23	FA2H	FUT4	CACNG6	DGKG	LYNX1	ANXA10	COX7A2	JPH2	LRRK2	CYC1	GPR4	GJB2	GSTM4	RASD2
BCL6B	PTPN12	WAS	CYP51A1	SLC7A11	LANCL2	FAM3D	SCG5	ZNF341	TRIM31	NDUFB7	TTYH1	PLA2G1B	TH	EDNRA	CDC42EP5	RNPC3	PRRT2
NDN	FGF10	FBXO6	ERGIC2	PANX2	ASZ1	ADAM12	SCGN	HCN3	CEACAM7	ACLY	CSTA	SNX25	ARHGEF2	TNFAIP8L1	IGFBP3	SYNJ2	ZNF350
TUBB8	RECQL	DDR1	POP4	SHC1	TFEC	CCDC60	PCSK1	G6PC3	CASR	HSP90AB1	CPA4	SOST	HPN	CALD1	FBLN2	MPP7	ZNF664
C3	SERPINI1	SPI1	DNAJC1	ABHD4	HOXA1	GAS2L2	IL17C	EXTL3	UGT2B28	ARPC1B	FAM110C	BAAT	TOP2A	SHANK3	MAN1A1	ZBED5	TYK2
LMCD1	ULK1	CLEC5A	SACM1L	GSR	MYOC	NTF3	SCN3A	PLXNB1	HSD17B2	SERF2	PPP1R14C	PRL	IL11RA	CACNA1C	NUAK1	CREBBP	PAQR3
ADH1A	ZC3H8	TTLL1	JAZF1	AKR1C3	LUZP2	LRRC49	NEB	FBXL6	NPC1L1	CDK2	ARHGEF4	CX3CL1	DPPA2	TPM2	FN1	TMOD3	EXTL2
THRA	FAT3	MAPK4	ARHGAP18	HAVCR1	LRPAP1	ZNF474	PROX1	VPS18	UGT2B17	PJA2	TNFRSF12A	ACSL5	DSP	MUSTN1	CRISPLD2	MBNL3	PBX1
MAP6D1	ABHD5	PHACTR3	CNIH4	ADH1C	DNAJB5	EYA1	DIRAS3	PPP2R3B	TFF1	NDUFA11	SERPINB5	EPHA4	LYPD5	EFEMP2	IGF2	CCDC7	FCRL1
GPM6A	GCNT2	SLA	SUCLG2	TXNRD1	COMMD4	FBXO15	VTN	FBXL8	LGALS4	RPS19BP1	RNASE7	DAPK2	DEPDC1	PCSK5	CCDC8	CLK4	ZNF486
HEPH	CDON	IL10RA	ZNF181		FAM120C	ALOX15	RHOD	SCAMP4	F5	RPS21	PTHLH	AQP1	TDRD5	SYDE1	SRPX2	GALNT11	CFB
NTNG1	ZNF598	KCTD1	GALNS		BNIP2	C9orf116	NEFL	SLC26A6	IL22RA1	SFXN1	SPRR2D	CD81	SLC6A15	FAM43A	PLD1	JMY	MAFK
MRGPRF	CIZ1	NOTCH2	MBNL2		C14orf39	PLCB3	RIBC2	DECR2	TRIM15	PRDM8	KLK5	MUC1	FAM83A	IGFBP4	COL15A1	ZNF10	KIF1B
PAFAH1B3	SLC36A1	TMOD1	SP4		P2RX4	ANKRD40	SCGB1D2	NOXA1	TRAK1	SIRT7	KRT16	DHCR24	ASF1B	COL13A1	CHSY1	SYDE2	SIPA1
INCENP	ECM1	ANTXR2	FNDC3A		RNF170	RNF139	SERPINA6	SREBF1	SERPINA5	L1CAM	SPRR2F	SLC34A2	MAGEA4	GFOD1	SFRP4	POGZ	RBMS2
FKBP4	BPGM	UBE2J1	SERINC1		LZTFL1	DNAI2	DUSP26	DOCK6	GKN1	N6AMT1	SLC13A5	CPNE2	POLQ		LRRC15	MACF1	LSAMP
MAMDC2	NRN1	EOMES	CDKN1B		ATP2B4	SLC5A1	GUCY2C	PLEKHH3	ALB	KCNQ1	CALML3	ENPP5	LYAR		FHL2	RAB12	GPR171
ABI3BP	RXRA	MCL1	PERP		INPP5B	NME5	GABRR1	RHPN1	CREG2	ACTG1	NRG4	GMPR	TUBB3		PNMA5	BCOR	CREG1
MOXD1	CCDC85A	POPDC3	IMPA1		IPMK	ATP12A	PITX2	RNF123	DUOX2	TMBIM1	COL4A5	LMO3	FAM90A1		SPOCD1	ARHGEF12	UQCRC1
CXCL2	PGLYRP4	GBP5	WSB2		TSPAN5	SPATA6	LY6H	ATXN7L2	ADH6	DPM3	ADAM23	ADRB2	CENPA		TNFAIP6	TRDMT1	EIF2AK2
NT5DC3	TRAPPC1	RARRES1	PPM1D		DPY19L1	COBL	PRAP1	PPP5C	UGT2A3	GNPTG	CDH3	MGLL	CHEK1		FLNC	TAOK1	ZDHHC20
SPARCL1	SLBP	ENTPD6	MTMR6		C1QL3	KATNAL2	TFAP2C	IDUA	SLC3A1	HINT1	ARSI	LONRF3	ATAD3B		COL6A1	GEMIN8	AHSG
STOM	KCTD18	ASGR1	SHOC2		TSEN2	PACRG	PPP1R1A	FGFRL1	VNN1	LSM7	SPRR1B	KIAA0319L	PLA2G10		GPLD1	RORA	PRX
FMOD	NLRP1	STK35	FAM102B		MLC1	FABP6	WNT11	NAT9	B3GALT5	RPS15	FBLIM1	MYO5C	MAGEA12		SNAI1	VAPB	ZNF532
TPM1	KLHL9	LIMD2	VRK2		STIM1	CCDC65	INA	CHTF18	MYOM3	C12orf45	NXN	RND1	WWC3		LOXL1	PNN	KCNE3
PRKD1	SRRM2	SLC43A2	ADI1		UNC13C	CDC42EP4	SH3GL2	SLC25A22	CDH17	MRPL53	SERPINB2	HRK	NUDT1		COL11A1	ZNF559	RAN
CFH	CBX1	BMP8A	RIN2		SNRPE	RGS22	KIF5C	CDC42BPB	TFF2	DBI	TMEM74	SELENBP1	MAGEA1		FSTL1	ZKSCAN1	CELSR3
BTNL9	PLOD3	STAT1	HECA		TBX18	DNAI1	PPM1E	KLHL17	CHST4	ZSWIM6	CITED4	THBS4	CDC6		COL5A2	TEX9	SRFBP1
PLXDC2	PCGF5	POMC	MTDH		ATF7IP	DEGS2	CALCB	UBE2O	TINAG	PEX11G	SEC14L2	SPRED2	GEMIN5		COL3A1	KIAA0232	NRIP3
JAM2	S100G	ATP2A3	UHRF2		DGKI	AGBL2	PDXP	FAM126A	REG1A	NDUFB3	KRT6A	EGFR	FANCG		SH3PXD2B	RBM12B	PGM3
UPK1A	FABP7	CMTM3	MRPL19		NTSR1	PCDHB7	CHST1	SUOX	SLC39A5	DNAJC4	SPRR1A	NPY	SNRPD2		PDGFRA	ZNF525	FUT7
CHST7	F11R	RAC2	PRPS2		BIRC6	DLEC1	GAP43	BCAR1	TM4SF20	ACOT7	EPHA2	ST3GAL5	CENPF		COL4A1	ATRX	APEX2
FANCA	FGF20	TNFAIP3	TIMM8A		TCP11L2	LDLRAD1	CLEC3A	FUT3	MUC17	ZNF415	PADI3	PRKAB1	NFIX		EMILIN1	SPATA13	TMEM164
RERG	PON3	ECE1	RABGAP1L		RALGPS1	KCNH3	APOA2	PTDSS2	UPK1B	NDUFA13	S100A14	MAEL	POLA2		A4GALT	NUFIP2	SP6
NEXN	SIRT2	ADAM7	KLF5		SDC3	MYB	GRIN2C	LGALS12	SLC15A1	UBB	ZNF185	FCGBP	GPR19		SNCAIP	MRPS25	SALL1
ICAM2	VDR	MARVELD3	ZNF680		BRIP1	GSTA2	APOA1	EPHB4	BCAS1	ZNF414	CYP2S1	VEPH1	TUBG1		PDGFRB	NDUFC2	TSPAN3
HOXA4	COTL1	CD96	YES1		SORL1	SCGB2A1	SNAP91	ANAPC2	MUC13	INCA1	RHCG	IVD	DCUN1D3		SH3GL1	CLEC4C	SIRT4
CLEC14A	RPL14	LY86	GPKOW		TTLL9	PPIL6	RPRML	PRPF3	CRP	TUBA1A	TRPV4	ALOX15B	RDM1		MXRA5	TEAD3	SLC25A5
CLDN18	PTX3	CHRNA5	SFPQ		SLC19A2	C1orf141	NOL4	GDPD3	UGT2B11	RANBP1	ITGB8	STEAP4	STC2		LUM	DDX17	CYS1
EME1	MMP15	HLA-DRB6	CBY1		IL12RB2	CKMT2	SLC6A17	SAMD4B	SYT13	PQBP1	FBXO17	SORT1	TPX2		F2R	CD3EAP	CCDC18
ZBTB37	QKI	AKR1C1	DNAJB4		USP45	ACSBG1	GUCA2B	TBC1D1	VILL	BAX	LIMK2	GUSB	LY6K		COL5A3	TBC1D23	C6orf141
FMO2	VASP	SHC4	PNPLA8		HRH1	VNN3	ITIH1	ZDHHC24	CLRN3	GSS	KLK6	NINJ2	CEACAM8		BGN	PHF6	PDK1
TNFAIP8L3	OBP2A	TP53INP1	CLIP1		DDX58	C1orf189	SEZ6L	ABCB9	TRIM54	C12orf57	MCC	AGR2	SLCO5A1		GAS1	C14orf28	COX8C
NDRG2	DYNC1I1	EPB41L4B	TUBD1		SPESP1	RPGR	KCNB2	DGCR2	LYPD2	AVPR1A	S100A10	PPP2R5A	PSMD3		MMP3	FAT4	MOCOS
DNASE1L3	RASSF7	LRP1	KIF21A		PPM1L	KCNB1	NEFM	GOLGA2	INSC	KRT10	SNTB1	ICAM4	CEP152		ISLR	SETX	HTR1D
FMO3	MMRN2	ADAM8	PRCP		LDLRAD2	LRRIQ1	ELAVL4	NSUN5	PLEKHH1	STT3A	LAMA3	SCNN1B	ZIC2		MFAP5	PURA	ZCCHC12
LAMA4	GCLC	LTK	NLK		SIT1	SLITRK1	DDC	ACAD10	OLFM4	MRPS2	BICD1	KCNK5	SCUBE2		FAP	AFMID	BTF3L4
CDH5	SNX7	TREM1	PRKCI		TNK2	SCGB1A1	DDX25	RAB40C	SULT1B1	GHRL	KRT15	MAOA	CSTF2		SLC12A8	RAVER2	NAALADL2
SH3D19	IQCE	IFITM1	NAB1		ZNF440	TNFRSF19	TEX101	CNNM3	ANXA13	CHMP5	KRT6C	HPCAL1	CDCA2		GUCY1A2	MBOAT2	PLAGL2
C1QTNF7	CCL28	PC	MEGF9		USP34	PRB4	GAL3ST1	TAZ	LEFTY1	RPL12	TINAGL1	MUC15	TIMM10		KLHDC8A	NR2C2	CCDC51
MYL9	FRS3	FKBP10	IL1R1		BPNT1	APOBEC4	AGT	RBCK1	DCDC2	RPL35	CAPNS2	DUSP6	WDR62		COMP	CBX5	RRAGD
RSPO1	RHBDF1	GALM	SLC38A6		CACNA1B	WDR78	SYT14	SIX5	ARL14	PRDX5	IGFL1	PIGR	SEC61A2		COL12A1	EXT1	S100A6
TCF21	NRBP2	MT1L	TLR1		CETN3	MAK	NEUROD1	RFX1	CCK	SYCP2	PNCK	PGC	C18orf54		CILP	APOL4	ATP10A
CA5B	SSX2IP	TMPRSS4	ID4		IVL	GFAP	NPM2	RGS14	NMUR2	MRPL28	KCNG1	CPT1C	HSPB7		PRRX1	RANBP10	P2RX2
POLE	CDC25B	S100A3	SEMA3C		ENTPD4	SPAG17	RTBDN	NPLOC4	IHH	RPL36	CASP14	TMEM87A	FBXO32		WWC1	PTPN21	TJP2
C14orf132	RER1	TBX1	USP25		PCDHGB7	PROM1	S100A11	RAD9A	CLCA1	SRP9	DOK6	PMM1	BYSL		THBS1	ZMYM2	EYA4
CYTL1	ZFYVE28	IFITM2	MYO10		BBX	MNS1	IL19	NME3	SLC7A9	DTYMK	FBN2	CEACAM6	LIG1		THY1	PIGL	ATP6V0D1
IGF1	USP2	PSTPIP1	ASCC3		GALNT12	C20orf85	IGFBP1	POR	MUC6	RPL27A	DKK1	NAPSA	CHEK2		SMO	BDP1	ODF2L
ASPA	CDR2L	RNF125	SAR1A		TNFRSF10C	MEOX1	PAGE1	GLIS3	ONECUT2	PRMT1	NUDT11	EXPH5	CAPN9		ABL2	USP33	TCF7L1
BCHE	ZNF684	LPIN2	GNA13		DPYSL5	DNAH7	ESRRG	NUMA1	USH1C	COL4A4	MYPN	CD1E	AVPI1		SPON2	PRICKLE2	SPCS1
KCNMB1	HIGD1A	PPFIA3	PDGFC		ALAS2	SPAG16	ST18	SLC24A2	SLC28A2	ZMAT5	YPEL1	RRAD	ENTPD7		GREM1	SDHAP3	ITIH5
KCTD12	FOXRED1	FHIT	CTSO		SYT3	PZP	CHGB	KLHL13	SFRP5	ATP13A4	CLDN1	GGT6	CENPH		HTRA3	ANKRD36	PCDHB14
TMEM88	TMCO6	TCTA	ZNF227		PDLIM5	ACBD7	RET	POLM	CIDEC	TGIF2	ST6GALNAC2	ACOXL	LHPP		GPC6	ZRANB1	F2RL3
FRZB	PLK2	CTSC	KTN1		MTRR	ARMC4	GAS2	COMMD8	TM4SF5	PSMC4	PKP1	RASGRF1	FOXA2		FGFR1	RASA2	MIDN
ADAMTS9	ANP32C	SMOC1	FGFR1OP2		NEK10	CRISP2	SLC38A3	PKN3	ANKS4B	IDH3A	KRT5	ALPL	CCDC34		IGFBP5	C17orf75	CHMP6
HTR2C	LEAP2	RELB	CCDC43		EPHX2	ROPN1L	KCNJ6	TMCO4	ACY3	AP1S1	LY6D	C1orf198	ACTL6A		ANGPTL2	CCDC14	ACVR2B
EGFL6	TSPAN8	PLAG1	MLF1		NAP1L2	C9orf24	SCN3B	PACS2	PRSS1	EEF1B2	GJB4	ACSM3	ZNF607		SULF1	BAGE2	PCDHGB4
PDLIM1	ANKRD6	ENTPD3	MORC4		WFDC12	MYCBPAP	NPTX1	HIP1R		RPL18	TMPRSS11D	AK1	KRCC1		LRP2	ZCWPW1	MAT1A
GPR88	GNAI1	APOBEC2	HOXC11		CD300LB	C6	SLC5A2	PICK1		TP53I13	ITGA6	INSL6	TCEA3		RGS4	TARBP1	SNRPN
HSPB8	SATB1	CD200	CAPZA1		PPWD1	MDH1B	CEBPB	MTA1		RUVBL1	MMP10	CACNA2D2	TDRD6		FNDC1	GCC2	DYNLL2
PUS1	PRKDC	KIF21B	C1GALT1		KIAA1755	TSGA10	PGAM2	TESK1		MRPL34	SPANXC	CLDN23	FEN1		COL1A2	CDC42BPA	GAL3ST2
CTSG	POLR2J3	PTPN14	SNX24		MFSD5	PIP	CRYBA2	ZMIZ2		LSM3	GPR87	MAGI3	ARFGEF2		COL5A1	ANKRA2	ATP9B
DES	SUMO2	PRKX	UBE2H		CLCN3	LRRC6	BEX1	MUC20		EXOSC4	NTRK2	GLS	PTRH2		TRAM2	PCDHAC2	BTD
RELN	DDX3Y	TRIM46	B3GNT5		DLG2	KCNE1	ASGR2	C1orf159		SLC25A1	SPRR2A	DOK4	NSUN7		ZNF365	UHMK1	PML
ACTA2	CUEDC1	TLR6	ARHGAP12		XG	GSTA3	ASCL1	AP2A2		RPS9	IL1A	CTSH	CUBN		OLFML2B	GMPPA	DPP3
ANGPT1	B3GNT3	IGFBP2	TIMM8B		CRISP3	DYNC2H1	GUCA2A	KIAA0556		ILF2	SPRR2C	FLRT3	FAM91A1		STK32A	ZNF660	GRINA
ADH1B	NMD3	TNFRSF17	YWHAG		PCDH8	NEK5	TUBB2B	DUS1L		RPL8	HBE1	UGT3A2	TDRD10		FSCN1	ZNF507	ASF1A
LPL	RUSC1	PROCR	RNF138		PRKCG	GRIN3B	BAALC	POMT2		VPS28	COL4A6	FILIP1	LMNB2		COL10A1	CEP170	YIF1A
MYH11	PRSS22	TMEM63C	NNT		PLA2G2F	AQP5	PHYHIPL	TNIP2		LSM4	CD109	CD55	RIC3		MFAP2	SCRN3	C1orf56
STXBP6	LRRC56	TNFSF12	ACTR3		TMBIM4	TCTEX1D1	TAGLN3	PBX3		ABHD12	FHL3	COL4A3	REEP4		LAMB1	TAS2R14	BRMS1L
MSX1	CARD6	GYPC	SSR3		TBX10	CHST9	KLK1	ZNF618		RWDD3	DQX1	CGNL1	TBC1D7		LOX	ZNF431	CRNN
EGR2	ABR	RPAP1	AVEN		PGAP1	RAB36	APOC3	RAP2A		LIPH	TMEM40	LRRC36	SH3BP5		IL12B	HESX1	ZNF75A
FEZ1	HSPE1	THPO	MRPL16		MAGEA5	GPR162	NR0B2	PPP1R10		CHMP2A	GJB6	HSD17B6	ALDH2		ITGB5	STK33	KATNAL1
GRIN1	PPIA	ABCB4	C6orf120		CCNL1	C1orf158	CAMK2B	TMEM62		IMPDH2	KRT19	SEC14L4	SLC16A4		SPHK1	B3GALNT2	EFNB1
KCNIP1	CA10	TNFRSF14	MRPL47		LRRCC1	CCDC17	EDN3	BCL9L		COPE	SPRR2G	FMR1NB	YIF1B		NID2	VPS13A	ALS2CL
FUCA1	AKAP9	CAPZA3	RLF		GPR17	ARMC2	TCERG1L	SH3BP5L		GNL3	GJB3	PRKCE	CBX7		MEGF11	SCML1	KCTD15
CLDN5	SPPL2B	TSPAN32	NXT2		KRTAP5-1	GSTA1	PAGE4			DAD1	C6orf15	DDHD2	DIAPH3		MARCKS	LPGAT1	ADH4
SHMT2	SMAD3	PIGZ	BMPR2		ZNF30	C22orf15	RNF186			TPI1	PLCD3	SMPDL3B	MXD4		ADAMTS2	CSNK1A1	FBXO33
HSPB2	PLA2G4A	SP8	ATP2B1		NR1I2	WDR54	SV2A			SEC61G	ADH7	DHRS3	LHX2		FMO1	PAK2	SNORD36C
CBLC	SOCS6	EML4	IER3IP1		SLC6A2	TSNAXIP1	CPN1			KRAS	VSNL1	CTAG2	GTSE1		CLEC11A	PHIP	ANXA2P3
RASIP1	SARM1	PRMT8	RBBP7		STXBP3	CASC1	NPPA			TEX264	CDCP1	HLA-DQB2	POLE2		COL1A1	IRAK1BP1	MPZ
MRM1	CHMP4C	FAM24B	YAP1		LIMS3	WDR49	TRIP6			AP2S1	TRIM29	SLC10A2	ELOVL3		CSMD2	LBR	MON1A
PTGIS	TATDN1	ANK1	ECHDC1		NGDN	CLDN8	HES6			GTF2H5	COL7A1	FCER1A	C1orf61		DIO2	ZNF395	TMEM41A
SCARA5	TBX6	CMTM4	PSIP1		RARG	C21orf58	KLK11			IGF2R	ITGA2	GPC4	RBPMS		GNMT	MEF2A	ZNF69
SCARA3	SYNPO	TFCP2L1	DSG4		SALL2	PRSS12	TACSTD2			RPL13A	KRT6B	CLIC3	ACACB		CST1	TRPC1	NEK8
EDNRB	XPNPEP2	CEP70	ANXA4		CACNB2	AKAP14	KLK13			RAB9B	KRT17	NPC2	GEMIN6		C1QTNF1	HOXA6	PTPRZ1
CAMK2N1	SLC33A1	CXCL9	ZDHHC2		CYP3A4	SPATA4	SERPINA11			LSM12	C10orf99	LMO7	CAD		C11orf54	OLFM2	PCDHGA10
PDE1A	PPP2R3C	HLA-F	FAM8A1		FTHL17	OSBPL6	CTNNA2			CHCHD5	COL17A1	ENPP3	ZWINT		ANK3	ATP13A3	CTNNAL1
POLD1	NFAM1	LGALS2	MOSPD1		KCNV1	GRP	GALNT13			KRT18	SERPINB7	CHIA	MSLN		UNC5B	CHD2	ARL2
LXN	IL20RA	MYO5B	VPS37A		ABCA10	BBS12	LRP1B			RFXANK	CDK6	C4BPA	CCNF		CTSK	TRAF3IP1	BMP8B
COX4I2	MTHFR	CACNA2D1	BNIP3L		HPS6	FOXJ1	PPP2R2B			RPS7	S100A16	TRIB1	DEPDC1B		CPZ	PCDHAC1	DOCK9
MS4A2	SMPX	NFKBIE	RANBP9		ARRDC4	IQCG	SERPINA10			NDUFS5	PHLDA1	SLC22A3	RCOR2		C5	HMGA1	OS9
RHOJ	CP	SCAMP3	HIF1A		DPPA5	EFHB	PIPOX			CBLN3	S100A2	CAMTA1	PSRC1		COL4A2	IL6R	RPUSD3
LMO4	SLC37A4	IFI16	GJA1		NOX1	LRRC46	CNN2			NUTF2	GJB5	HOXD1	SLC44A4		ANTXR1	MYBBP1A	MSX2
UPB1	TFAP2E	UAP1L1	PTPRG		CYP2U1	CCNA1	CHGA			SMS	BCL11A	SDC4	ZNF239		AEBP1	IL6ST	ALKBH8
MSRA	TMEM80	FCRL2	CSRP2		CES3	EFHC2	VGF			PAX7	SPRR3	SCARB1	PAX9		CYP26A1	NPAT	CLSTN1
ARHGEF15	TMEM86B	ERBB3	KLHL2		PEX19	ABCA13	KCNA4			POLR3G	FBXO27	CDKL2	NOSTRIN		ITGA11	VPS13B	BLVRB
ABLIM3	RPIA	RGL1	TMEM19		DHRS7B	MORN3	SYP			COX6A1	CYB5R2	DPP4	CYP4Z1		RBP1	DMTF1	IGSF10
PPP1R3C	MYO1C	FAM81A	TUBG2		FGF1	NEK11				CHMP1B	LETM2	PHYHD1	SPAG4		COL22A1	STIM2	SOX2
STK32B	GNA11	IRF8	NFIL3		SLC25A36	TEKT4				HSF1	FAT2	LAMP3	PRAME		POSTN	ZNF83	DTX3L
SLC16A2	BTAF1	PEMT	PPP3CA		ZNF615	RBM20				PDXK	DMRT3	TP53I11	C19orf48		ROR2	ZNF124	DMRTA2
RASL11B	C9orf106	SUSD3	LSM6		NUDT10	CALML4				SERTAD3		SCGB3A2	RNASEH2A		SERPINE2	PAM	MPL
SCARF2	TAF1C	SCRN1	OSBPL11		NHLH2	SERPINI2				MRPL20		RPS6KA3	ABLIM1		TAC1	OGT	FKBP8
RECK	GABARAP	HS3ST2			ARL3	ALDH1L1				PRDX2		HHIP	RRM2		THBS2	PDPR	RHOF
SHE	CLSTN2	FLT3LG			RSPO2	GABRP				GNS		CYP4B1	WDR12		FHOD3	ARHGEF10	TMTC3
PCDHB4	KCNJ1	TTC12			PCDHGB3	LRRC18				RABAC1		CRTAC1	KIF3C		NOX4	ZNF529	TMEM64
VWF	F3	SGCG			MCCC1	SPAG8				FBN3		HSD17B4	CRABP1			GMCL1	KCNH6
ITLN1	SH3TC1	ZAP70			DHX34	SRD5A2				MRPS33		TRPC6	POLR2J			ZBTB10	RPL37
FOXF2	ACTA1	ENO3			FCGR3A	SOX9				PXMP2		HMGCL	CES2			KIAA1958	ST6GALNAC4
FRMD4A	LRRC14	MSI2			GAS5	EFCAB1				MAD1L1		ACADSB	COCH			TCEA1	SEMA3A
UBL3	C18orf21	FYN			OR1J4	SLC22A4				RPGRIP1		CD207	SFXN4			HIPK3	HTR3A
LIMS2	POLG2	HLA-DPB2			ZNF675	IQCK				RPL34		FOLR1	ATF2			ENAH	SGPP1
CRYAB	CAMK1D	GBP2			SKI	CYP2F1				CSTB		IFT57	XPO5			TSC22D4	TOR2A
TLL1	THAP10	TSPAN33			LONRF1	TEKT3				PGLS		CFTR	NCAPG2			RBAK	LTF
HSPB6	TPM4	MAGEE2			LIG4	SPAG6				ZNF283		LDLR	TK1				RPPH1
VIM	LY6G6C	SLC8A2			PRKCQ	OXTR				SCAND1		DPYSL2	ZBTB16				KCTD7
REP15	HPX	TOB1			SH3BP4	DZIP3				ZNRD1		WTIP	TBRG4				RAB4A
INMT	WDR19	FGL1			PLK1	DNAH11				CDC34		USP44	CBS				CYP39A1
HTRA1	SLC25A42	CATSPER1			XKR9	TTC25				NPB		TEPP	ZBTB20				ARHGAP22
NAALAD2	GADD45GIP1	SLC25A27			CNTN6	PRB3				YWHAZ		GPRC5A	GGA2				BLZF1
ADAMTSL3	CLIC6	FXYD4			AEBP2	RYR3				SNCG		CA13	ASPM				QDPR
ZNHIT1	MBD6	MAPK8IP1			CGRRF1	C10orf95				SSBP4		TAC3	PRIM1				LGR4
CYYR1	CCT5	ZYX			CFI	LRRC23				GNG10		PXMP4	PAQR4				PIGX
CEP72	SEMA4B	ALKBH4			PCDHA11	CERKL				IDH2		PARD6B	DISP1				C3orf52
MOCS1	CHRDL2	SDCBP			SLC35C1	DNAJA4				LIN7B		ACE2	ZMYND12				TAF4B
FXYD1	ULK3	JAKMIP2			CD47	FAM83G				GPX4		RNASE1	CDC20				DPH3
ZFPM2	VAMP8	RBM38			MATN2					TMEM134		MMP28	GPC5				STC1
CSF3	ATP13A1	LILRA5			TXNRD2					TAF12		GDF15	SBSN				WNT5B
KLF2	RPP25	PLA2G4C			PUS7					RPL26		PTCHD1	MCM6				TDRD1
OLFML1	TMSB4Y	GFPT2			GATA6					MORN2		PLA2G12B	MCM7				ECH1
TBL3	CHST2	PILRA			LRP6					PKIB		PTPRE	DTNA				TMEM99
TRIB3	TICAM1	NFATC4			ARID5B					SERPINC1		MVP	KIF4A				CCDC71
CRIP2	GOLGB1	CC2D1A			PCCA					MRPL4		SUSD2	TACC3				CD300E
PI16	CAPN12	DEFB126			MPG					MRPL45		CYP4X1	ARNT2				N4BP2
NR2F2	TBC1D8	CCL11			SLC12A2					GTF2A2		FST	RPS23				PVR
PCDHB12	SLC1A7	NAPSB			HES1					TCEAL8		KCNJ15	TSNARE1				ZNF460
TYRP1	IL1RAPL1	RLN3			PRIMA1					MRPL33		DHDH	IGF2BP3				SLC25A24
DKK3	MBNL1	LTB			ZNF154					TPT1		MAPK10	PRR11				PTER
MAPK8IP2	OSBPL2	APOBEC3C			RAB11FIP2					RUVBL2		GNA14	GPR37				CRADD
DUSP18	ADCY6	NRP1			SAGE1					ALKBH7		ATP10B	ZNF695				RAB3A
CACNA2D3	NTNG2	FLT3			DHFR					RPL17		SLC15A2	PBXIP1				RHOH
SMOC2	NBEA	SNX22			SSX5					RPSA		GPD1L	SNRPB				IGF2BP2
PAPSS2	PSMA7	TXNL4B			PPARD					MRPL21		PEBP4	PLEK2				CIAPIN1
SMARCA2	BCL9	LAIR1			ZCRB1					RPL35A		ELOVL4	BNIPL				ARRDC3
PRELP	CRABP2	GCHFR			TCEAL5					ANKRD26		TSPAN4	MBP				AADAC
CD34	TMC7	JAK2			SLC25A25					RPS3		DMBT1	CMAS				CPD
KLF6	CNOT8	TNFRSF13B			ZBTB1					RPL30		ACADL	TNNI3				ZNF713
JUNB	ZNF76	IFNG			LRAT					SERPINH1		AMOT	PLK4				PIGK
TRO	SPHK2	PAK4			HS3ST3B1					MRPS34		PTPN13	IL23A				ADNP
SEMA6A	RLN2	GRN			SLC16A10					ZNF433		RGMA	NEIL3				JDP2
SPARC	BIN2	EBI3			ZNF138					FIS1		SFTPC	PDCL3				DHRS2
ENPP2	DDOST	BTN3A2			PTPRR					BAD		XAGE3	MKI67				CYP11A1
IGFBP7	EIF1AY	LHFPL5			TAF4					WFS1		CYB5A	ZFP2				HOXB13
FCN3	NUDT8	PTCRA			RNF157					KRT20		CDH2	CDC25C				CACNA1H
MVD	GKAP1	SLC31A2			ACD					MPDU1		TMPRSS2	MAD2L1				SLC39A13
REM1	ALDH1A1	GAB2			NAV1					TXN		HAND1	GAPDH				AURKAIP1
DUSP1	TMEM159	WDR3			CRYL1					RPL29		ANKRD29	NME1				B3GNT6
SLCO2A1	AHNAK	L3MBTL4			YARS2					COX8A		CPAMD8	ESPL1				DMRTC2
HBEGF	HRC	TRIM22			IFT80					MRPS24		CCDC28B	PPAT				ZNF266
SLC5A6	DOCK3	TMEM26			ARHGAP5					MYL3		SNX30	HELLS				DZIP1L
ABCA6	GUCA1B	DHCR7			LNX2					ZDHHC12		APLP2	DONSON				CXCL14
PKNOX2	PLCB1	USP21			CD177					AP3S1		GBA3	FIGNL1				ZFP42
ANXA6	BLVRA	HDAC11			ARMC7					RPS2		REPS2	HECW2				CCDC47
CD36	VWA2	STX11			HNF4A					SNRPF		SMOX	POP1				LCAT
MSRB3	LYPD1	ANKRD22			USPL1					ZNF653		UNC13B	CDC7				ZIC3
RCBTB2	PTOV1	FLAD1			TNIK					FAM86B1		AGR3	BLM				BAG1
OLFML2A	KCNQ3	KLC2			PRKAB2					RPS6		RAB27A	CCNE1				CLASP2
CEP250	NOVA2	CRYZ			USP47					CLPP		PDLIM4	OTX1				ALKBH3
PLAC9	TMEM50B	GRHL1			MBIP					ELOVL2		PDLIM7	SMC4				CKM
CTTNBP2	USP11	ALDH3A2			CENPJ					KPNA5		SMTN	EIF4EBP1				NDUFS8
SOCS3	GNPNAT1	PLA1A			GTPBP10					RPS26		IRX2	SRPK1				SCGB2A2
ZNF687	UNC5A	CD33			EDEM1					MRPL54		ABCA3	SPDEF				SLC2A4
TBX3	HAT1	SCML4			ATP10D					POLR3K		ALCAM	CDH24				MCOLN3
CNN1	MPP3	ARRDC1			MT1JP					SNRPC		UBTD1	ASNS				TTC21A
ADAMTS1	ANKK1	SH3BGR			C1orf210					STAT3		CCL17	ADRA1B				ZFX
CALCRL	SCAMP2	CCDC24			FAM9B					DUSP7		TNNC1	ATOH8				LILRB1
PRSS23	GOLT1B	IFI44			NKX2-8					CDC42SE1		CTSE	CKS2				ACTN4
CBX8	TCF7L2	CAMK1G			QSER1					PAQR5		ELF5	PPIH				COX10
IL13RA2	TMEM33	LOXL3			ADAMTS10					KLF8		SERPIND1	KIF2C				PEBP1
ATIC	PCTP	PNMT			LPAL2					PGAM1		C1orf116	SCNN1A				FASTKD3
CCL23	SCCPDH	TPP1			ANKRD10					COX6B1		HPGD	MRPL11				HDDC3
STYXL1	RHOT2	GSC			ADD2					ASPN		JPH1	MAN2A2				PARP14
GLDN	ZDHHC11	CCL8			HERC1					DCPS		SLC17A8	KLHDC7B				PRKAR1B
EMCN	LIPK	PLXNC1			ANKRD50					ARPC3		SFTPA1	EXOSC5				VAT1
ABCA9	ZNF85	RETN			C7orf31					RPLP0		CCL22	NFKBIB				HSPBP1
BLCAP	PPP1R13B	PCDHGB5			LHX1					ASAH1		CDKL5	NRAS				MRPS35
PTGER1	COL21A1	JUP			CHD1					TOP1MT		MMP24	RFC4				HHLA3
UST	THUMPD3	CDKN1A			ANKMY2					RPS5		PAGE5	RAD54B				TMEM44
HDC	SLCO4A1	TBC1D19			CALB1					PHPT1		SFTPB	CCNA2				ZNF613
PTPRD	ZNF681	RAB40B			SLC12A7					MRPL12		ADCY9	UHRF1				HRAS
PECAM1	PGBD5	MAL			KHDRBS2					DPP7		LTA4H	CSAG1				MRPL38
MGMT	MTMR11	ANGPTL4			HOXB6					APRT		MYO6	CHAF1B				FAIM2
MYLK	CDK4	ZNF517			ZYG11A					MT1X			SENP5				BMP5
ZMYND19	GLI4	KLRB1			AKT3					ARF5			TRIP13				SLC31A1
PLA2G5	HCN2	FNBP1			KIFC3					MRPL9			ARL9				RASSF3
R3HDML	METTL7A	EMILIN2			OR52N2					SNHG5			MTHFD2				PNPT1
MYH10	VEGFA	FABP3			OPN1SW					RPL39			CSE1L				ATP8A1
ABCA8	SNRPA	FGD2			CEACAM4					DDIT3			TAF7L				XRCC1
PGM5	CSTF2T	MVK			CASQ1					RAB11FIP5			E2F8				CYP4F8
GEM	CCDC121	DOCK2			SLFN5					NOSIP			E2F2				LPP
KCNN2	UQCRC2	GFRA1			CYP4Z2P					VPS25			HOXA13				SYNPO2L
ACTG2	ZDHHC8	SPIRE2			DDAH1					BANF1			TMEM132A				KDELR2
CH25H	QRICH2	IL1RN			LDHD					TAGLN2			KIF11				CRTC2
GSTM5	SGSH	SYT7			SLC37A1					DIAPH2			DUSP14				TMEM63B
RBM41	INSR	CSF3R			CYLC2					STUB1			ARRB1				PEAR1
TMEM47	GAST	GLIS2			BTBD9								ADRM1				STOX2
RBPMS2	ORMDL2	LTBP1			SMAD5								ARL5B				RAB6B
ALKBH2	ZNF707	TIPARP			MYO1B								DPH2				METTL5
FBLN1	PFDN2	MAGEE1			SNX16								AASS				TBL1X
TSC22D3	TMEM63A	CARD8			IL26								EXO1				RABGGTA
VGLL3	RFK	TLR2			PRTG								RECQL4				TMEM70
CPXM2	AP1S3	HAMP			SRM								EPHB2				BIN1
AOX1	FBXL19	HES5			FBXL18								CA1				SIGLEC11
CASQ2	RAPGEF4	OSBP2			C17orf64								EZH2				UPK3A
CACHD1	HOXA11	CD69			TM2D2								MAD2L2				ARF4
SPTB	CBX6	OTUB2			PCDHGC3								RORC				UPK3B
FHL1	CLCNKA	MGAT4A			OTOS								FANCB				SGTA
GPM6B	XIST	CD74			C8orf34								NMU				PBX4
ZC3H12B	MYC	MTNR1A			OFCC1								IRX3				CYCS
CST2	DHTKD1	DPYS			BAMBI								KCNK3				KCNH8
ECM2	SPATS2	SPINK6			NCOA7								RGN				PRLR
RAB27B	PTP4A1	SLC2A13			FOXN1								CDH18				C8A
LEPR	RASAL2	CCHCR1			HIC1								STMN1				MLLT6
CBLN2	TTLL6	CD244			TIGD7								SLC26A9				DAPK3
C7	ZBTB17	SLC15A3			NTN1								OR8G5				CROT
TIMP3	APBB1	STAC3			ZNF614								DTL				UGCG
NR4A3	CNKSR1	DDN			CEBPE								RNF39				ZNF264
LAMA2	MAMDC4	KRT40			HS6ST1								MYO9A				EMP2
COLEC12	MAP2K6	DOCK8			CCR4								PSMC3IP				PEPD
FAM107A	GSTM2	RGS1			ACP6								UBE2C				ASRGL1
IL33	PAK1IP1	AACS			WNK1								NPM3				STAB1
MAOB	CDS1	HSD11B2			TM7SF3								CDCA5				MAP7
SPTBN1	CLDN11	DNER			CPEB2								MARCKSL1				SETBP1
RUNX1T1	EVC2	UBD			KREMEN2								SMARCD3				SEMA5B
TCEAL2	ZNF560	PDE4B			RNASE10								GPD1				OFD1
RAET1E	NMI	GNGT1			TRPA1								ADM				ALDH8A1
ESAM	NOS1AP	IGLL1			KIT								CDCA4				DCUN1D5
PPFIA4	SLC16A13	UTS2			C9orf62								CPB2				KCNAB3
OSR1	PIK3C3	DPM2			CCDC6								PNMA2				HAPLN1
FHL5	CECR2	DPEP3			GRIN2D								BRCA1				CBLB
PDE10A	TSPAN12	GIMAP7			PF4V1								SMC2				GIT1
HSPB3	RPLP1	RGS19			DUSP13								MELK				VWCE
LDB2	ZBTB40	GNGT2			MCF2L								FOXM1				ARHGEF10L
SLIT2	MAGI1	LAG3			KCNQ4								AURKA				TGFBR1
FOLR3	ZNF337	AXL			PARP8								CDK5R1				CLOCK
CCDC3	EVC	ZNF205			PALM								SERINC5				NLN
MCTP1	IFRD1	PSAP			BDKRB1								CNR1				PLD3
LRFN4	ISYNA1	POLR3H			LILRA1								TYMS				SEMA3B
SGCD	SNHG8	OVOL2			MYBL2								SGPL1				STEAP1
HSPA12B	MIF4GD	PREX1			C20orf141								PFKFB4				SERTAD1
WNT3A	SKIV2L	KIF25			ACBD6								AKAP13				LAMP2
SERPINA3	MRC2	CRYM			KCTD16								HMMR				RARA
PDK4	PARP11	TMEM17			LOXL2								LRP4				RP2
SAC3D1	GALK1	TMEM30B			MALAT1								SIDT2				PKHD1
SPON1	SNRPD1	N4BP3			DAAM1								TROAP				TNNT2
SNCA	MYO1E	AP3B2			CYP2A13								FANCD2				AMD1
FOS	TRIOBP	GREB1			TRIP11								ECT2				NFXL1
SLC39A8	S100A13	DACH2			PYGM								TFDP1				PPM1H
DNM3	GOLGA8B	GRK6			OXR1								AHCY				ACAT1
APCDD1	EGR3	RAI1			ATG9B								MEST				LRRC3
SH3GL3	OPRD1	MDM1			ZMPSTE24								NUP155				GPAM
CHN1	SBK1	OXSM			NEDD9								PRDM16				MTMR12
CLEC3B	OTUD6B	MS4A7			PRKAA1								SH3BGRL2				CSPG5
TCEAL7	PPP1R3F	HTRA4			MON2								SLC16A5				PARP10
RBMS3	FBXO36	ABCA5			UNC13A								IRX5				INSIG1
EGR1	SLC9A5	PARP4			FRRS1								PLEKHJ1				GULP1
ID3	ABCA4	ATF5			NR2E1								CAPN13				ARNTL2
STON1	ANKRD27	P2RY13			ATP8A2								MAGEC2				GALR2
ITM2A	AAMP	IFT81			LAMB3								PAICS				TAS1R1
GPR146	SLC6A9	NLGN4X			SIGLEC12								RAD51AP1				PSG9
GJA4	DTNB	SERPING1			DCBLD2								VRK1				SLC6A11
SPRY1	LMNA	CMTM8			SLCO6A1								E2F7				COMMD2
KLF9	YIPF2	POU2F2			SWAP70								DLC1				NAGA
TGFBR2	NAGS	FGF19			NUP205								CDKN3				CCDC110
CCL13	STARD4	LILRB5			TRHDE								CHAF1A				PLCH2
ZNF620	HPS1	GIMAP8			TNFRSF10A								KPTN				SLC35A2
IL1RL1	MUC5B	AQP3			CLN5								AXIN2				PDE6B
PCDH18	RND3	CCL7			ELF1								CDT1				PLXNA1
SCRG1	IRX6	IL22RA2			USP38								POU4F1				DCBLD1
KCNT2	DNHD1	P2RY8			PTPN6								PTTG1				MYH2
SVEP1	SLITRK4	ICOS			ZNF141								LRP2BP				RNF175
MAN1C1	FDX1	LRRTM1			IGFBPL1								ADAMTSL2				MGC27382
ADARB1	CDC5L	HLA-B			SUV39H2								GLDC				ITGB1BP1
SCN4B	ACVR1B	INTU			CUL5								TCF19				GPRC5B
APOLD1	DUSP9	IFIH1			POLA1								RAD51				AKAP5
SOX17	ZNF281	ST3GAL1			DUSP27								CCNB2				GPR161
PMP22	ZNF383	SLN			SLITRK3								HHLA2				NAT1
THBD	ZNF608	FBXL16			ITGA7								KNTC1				ATG10
ITLN2	APBB3	GATM			GPS2								PIF1				CRELD2
A2M	BMP4	LAP3			HIRIP3								RPL36A				BHLHB9
KL	POF1B	TSTA3			PPP3CC								AGMAT				MOV10L1
RAC3	FOXQ1	ADAM19			CHCHD4								KIF23				SPC24
RAMP3	HDDC2	OBSL1			ZNF426								HABP2				TMTC2
CAV2	TTTY14	KCTD5			MASP1								HOXA10				TUSC3
WDR34	SDC2	GPR65			EPS8L2								SSBP2				IARS2
AGTR1	NSUN6	AP4M1			TMPRSS11E								CCNE2				GJB7
RGS5	NR1H2	PCSK1N			C11orf16								NUSAP1				LAMB2
PKD2	RBP4	AQP7P1			ZNF134								KCNK17				HSD17B8
SRC	FAM111B	HOOK1			RNF167								NPFFR2				GUF1
ANGPTL1	TCF3	VMO1			SNHG3								BOLA3				ASCL2
ENG	CACNA1F	NPTXR			EPM2AIP1								POLR3D				SPTLC3
EFEMP1	SOX14	TMED3			DNAH5								JUN				CIC
TSPAN7	UCN	GZMH			JARID2								SKP2				GNL3L
LRRC4C	RPUSD1	CA3			JOSD1								GANC				BLNK
GADD45B	ZMAT1	RGS9BP			LHX9								PRELID1				EFNB3
ZNF423	ZADH2	TNFAIP8			SMG1								ATAD2				SGPP2
DCN	ZNF585B	CD3D			SIPA1L3								NCALD				ZP2
SOX18	MST1	TRIM9			ACSL4								HSPD1				TSEN34
CD59	ATN1	MAP3K8			PCDHGB2								LRP8				SP1
PODN	RAB6A	LGR6			ZNF597								TMEM38B				FRAT1
MGP	CLDN3	GPT2			PIWIL2								TXNDC11				CHMP4B
CAV1	CHST3	TIMP2			FOLH1								RAI2				HERPUD1
SOX30	SMARCA1	ST14			IGSF1								LIN28B				FKBP5
UACA	SCUBE3	HCP5			ZNF404								F11				COMT
PALLD	LSM10	GPR37L1			RNF141								MAGEB2				AMDHD2
SGIP1	ECHDC2	BAIAP2			PRTN3								DARS2				MAFA
HOXA5	CDKN1C	ITGAM			MAGEH1								DNMT1				RHOBTB3
C1orf21	PLEKHF2	TDO2			TMEM42								CCND3				SLC25A4
ZNF366	RTN4RL1	MMP7			CDR2								FRMD5				PLXND1
AFF2	NFKBIZ	CLEC2D			TP53I3								CKAP2				DNAJC14
VCL	EIF1B	CPNE4			PBOV1								CDCA8				PHLDA3
MFAP4	SCRIB	CNDP1			C19orf25								BMP2				CNTN3
ZNF441	D2HGDH	MAST3			GLCE								CDCA7				HORMAD1
WFDC3	SLC9A1	GABRQ			CHRNA3								LMNB1				DCHS1
MYCT1	B4GALT6	OASL			TOPBP1								PSPH				C3orf38
AKAP7	ENC1	LACTB			RIMS4								IFT172				HSPA2
NR4A1	NDP	TULP3			LILRA4								KBTBD11				FKBP14
AGER	POLRMT	HCST			GDAP2								FEM1C				B4GALT5
FGD5	CST4	GPRC5C			LIMD1								PRDM6				MXRA7
PROS1	ZNF467	TMEM107			PSG6								BOK				IL4R
MEF2C	TFEB	ARC			DAG1								INHBE				TMEM123
EFNB2	MIPOL1	ZFP3			TIGD3								RAB7B				RCBTB1
CA2	LCN12	CLDN7			KCND3								FBXW4				COL18A1
ZFP36	ITGA3	LCP2			COL23A1								CYFIP2				ETNK1
MTA3	PNPLA2	DBF4			LPA								TEX15				NASP
SMYD5	PRKD3	NBEAL1			CRYGN								GAL				TMEM69
SUV39H1	ZNF543	APOC1			KIF13A								HDGF				SNRPD3
CBLN4	TMEM14B	TM6SF1			TRPM7								GTPBP4				ZNF670
TGFBR3	DRD1	PHOX2B			APOBEC3D								CDH12				CYB5D2
APLN	GIPR	SLFN11			ZNF429								CYP4V2				POLR2A
SOCS2	EMX2	VPREB3			KLC3								KIFC1				ASB9
NAP1L3	NUP54	CYBA			PCYOX1								NUF2				ANKRD35
ABCC9	TLE3	PELI3			DAB1								ERN2				LILRA6
RASL12	TPTE	EMP3			ZNF175								CEP55				MGST1
CBX2	FOXB1	CD180			AHRR								MASTL				RUNX2
CX3CR1	ABCC10	GALNT2			GRIK3								NEURL2				NID1
TBX4	PIP5KL1	DTX4			WWC2								GNG7				LRRC42
GPR153	TTC14	HLA-DRB1			STX10								BUB1				MB
TKT	SOX4	FAM78A			CNKSR3								PDSS1				ATP1A3
LRRN3	IGFALS	TPK1			ZNF480								NR3C2				SULT1C2
MXRA8	ATP1B2	SYTL3			PLA2G4D								UBE2T				ADORA1
CNN3	PIGM	EPHB1			CACNB4								MRPS36				ST3GAL4
SOX7	SYT12	NOTUM			APH1B								PER2				MS4A10
PDE2A	TBC1D10A	SLC2A3			AMPD3								PACSIN2				RBM25
VAV3	FAM50A	ABHD1			DHRS7								SPC25				RFC3
JAM3	SLC28A3	SYPL2			RGS6								SLC6A16				ARSG
EPAS1	STRAP	GLUL			TIGD5								CENPI				NFIB
KIF22	MINPP1	PLAT			APCS								RBL1				DPY19L2
SESN1	SLC7A10	OPTN			EREG								DUOX1				ZNF493
TOX	STX1A	S100A4			SNHG10								SLC12A3				PPIL1
HBB	SMPDL3A	HYAL3			PCDHGA6								RHOBTB2				PLD4
TM4SF18	CHKA	ZNF195			ADAMTS14								SHROOM4				HINT2
CPA3	BAK1	TPPP			FOXP3								PLEKHH2				CACNA1I
HUNK	PLEKHG1	UBASH3A			ADAMTS16								DSC2				PSG4
SRPX	PARP9	CUL7			CAMSAP1								PIK3R1				XRCC5
BOC	KIAA0100	IL21R			ASMTL								ZSWIM5				PNMA1
TEK	C21orf91	PITPNM2			PDZRN4								PRKAA2				MRPS28
SLC7A5	KCNS1	BIRC7			DDX54								GPI				RHBG
TAGLN	NIPSNAP3A	KCNAB2			MGAT5B								NRM				ACSM1
SLC6A4	KIF13B	ITPR2			IBSP								GGH				DOCK4
GPC3	PLXNA3	PDE3A			TMEM65								KIAA0513				COG5
NES	TOLLIP	MGAT5			ATXN7								KIF20A				PCCB
EML1	UTY	RAB20			CRLF2								SGCA				P4HA3
BNC2	SH3RF2	NNMT			ZNF235								MCM10				ZNF524
PYGO2	MPPED2	ITGAD			SLC1A1								CD300LG				CITED1
PRND	MAPK8IP3	TBXAS1			SPRED3								CYP3A5				CD82
PDE7B	NME7	METRNL			CYP17A1								HPRT1				SMARCD2
SEMA3G	LSM2	SIGLEC7			EMID1								ARHGAP24				ZNF276
MPDZ	OSBPL7	CFDP1			HGF								WDHD1				HPS3
SEMA5A	BFSP2	ZNF256			HFE								WDR76				RBBP8
LATS2	GPSM1	RIPK2			PAPPA2								RPP40				SLC6A3
HIGD1B	FLT4	GAB3			WASF2								FOSB				CORO1B
TUBB1	CCDC9	ALDH4A1			TXLNB								PSMB3				LCOR
BCAT2	PTN	RAB32			SLC35A5								SORCS2				BICC1
ATF3	HSPA1A	FTL			SNORD56								ITGA9				MT3
CXCL12	HOMER1	KCNJ8			BIVM								MTBP				KLRK1
PLN	ISL1	HLA-DMA			ADRA2C								CALCOCO1				P4HA2
HEG1	SLC22A18	RAB30			AMFR								UCK2				ANKRD37
GATA2	C1QTNF6	SSNA1			SALL3								ZNF581				MBD4
NAP1L5	ZNF354A	CLEC12A			ARHGAP27								AFF3				POLD4
GHR	LGI4	CXorf21			OR5P3								TRIM28				SYTL5
GNG11	NFE2	XPR1			CCRL2								VAPA				ABHD8
ADAMTS8	LENG1	PIP5K1A			HCN4								GNG4				F7
HOXA2	GUCY1B2	PTPN22			STRN3								CST5				XRCC2
SLC22A16	TRPS1	WT1			NHS								NEFH				SDF2L1
NRIP2	TM9SF2	NENF			MOAP1								MYOZ1				ZNF257
FILIP1L	BTC	IL17RE			LAMP1								SCTR				HSF2
LMO2	MXD3	DBH			C8orf58								MRPS17				ACTN2
COX7A1	CIB1	CD40LG			YOD1								KLF15				GLCCI1
DZIP1	EAF1	PRKCH			SLC12A4								ETS2				ATP7A
SLIT3	MGAM	GPX1			GNAT3								CDC25A				SLC5A8
SLC38A2	HKDC1	TRAFD1			SYCE1								ROBO2				PLEKHA3
PHACTR2	ANKFN1	SLC4A3			ZNF208								ZBTB4				RBKS
LRRC17	NUP210L	TUBB2A			PELI2								MPHOSPH9				LEMD1
SSPN	ZNF610	AGRP			CADPS								KIF14				ACADM
OTC	SLC16A9	IGSF8			ABCE1								ACYP1				DNAJB13
ZNF521	FANCF	FCGR2A			TTC7B								RAB17				TAS2R10
OGN	AXIN1	ENAM			AVPR2								PHF19				PFN4
PFDN6	PARS2	SYT11			ZNF492								AUTS2				NEDD4
BTG2	VAMP2	STAC			HACE1								HLF				MYO9B
REEP1	CHAC1	NUDT17			KLHL26								MEF2D				AGPAT5
TMEM100	GIP	GSTP1			PEX14								BRI3BP				DMAP1
GRK5	TOM1L2	TNFRSF1B			ADAMTS15								CNTNAP2				NFKB2
SLC19A3	GNRH1	CA6			NETO1								MIF				PGK1
HAS1	ZNF511	RNASE3			USP46								SHANK2				DLG4
MMRN1	TG	KYNU			RAB9A								KIF1C				TMEM98
NR4A2	SLC23A3	TMPRSS6			CYP2C19								XRCC3				OR7D2
GYPE	ITGBL1	GPR27			TACR1								MCM2				MAML2
ANAPC11	SLC24A3	TSHR			RNF180								COX7B2				CKLF
CITED2	UNC93A	LYSMD1			STAC2								KIF18A				CLN8
LMOD1	GPR25	SCARF1			IRF2BP2								ARSD				FGF2
AOC3	IFT88	FZD9			CEP350								HSP90B1				FADS3
TIE1	BCAM	CCL19			ZFP37								MAGEA10				DMRTA1
SELP	CACNB3	TRIM45			KIF19								MYOZ3				RAB11FIP4
TNFRSF11A	ARHGAP29	FSIP2			TCIRG1								ADHFE1				SCNN1D
FOXF1	CCND1	STIP1			GFER								ITGA8				MRPL51
	MPHOSPH6	CTLA4			DLL1								PIP5K1B				PDK2
	BMPER	STK10			YTHDC2								GPC2				POLR2L
	RASGEF1C	GRIK2			RNF128								HYAL1				IFRD2
	DNAJC15	NFATC1			WRN								DNMT3B				NMNAT3
	FNBP4	FCER2			ANKRD12								TMPO				RB1
	TRAM1L1	FCRL3			NAGLU								RFC2				GLYATL2
	PADI2	ATP7B			TTN								DMBX1				NMB
	XYLB	DYSF			METTL3								MND1				FBXL17
	IRX4	NPC1			OPRK1								DAAM2				MYO18A
	GPX7	INHA			PART1								CDKL1				PGM2L1
	GOLGA4	CAB39L			CRTAM								HYLS1				SLCO1B1
	SLC25A34	RAB25			MYOT								BCL2L12				SLC25A43
	ZDHHC1	GABRB3			GPRASP1								CDKN2D				KCTD11
	ITGAE	CHI3L2			HPR								MRPS12				CD200R1
	DTX3	TMEM154			DLX4								GSTM3				TBC1D22A
	MYEF2	TIMD4			PAK3								OIP5				PIK3C2B
	AQP6	CCL21			ANG								PSAT1				C17orf80
	CYP1A1	SDSL			WDR35								LIN9				AHSA1
	RDH13	EVI2B			ST7								TMC5				TOR1AIP2
	VSIG8	GLS2			FNBP1L								CENPM				QPCTL
	GYS1	SAMHD1			NKIRAS1								SYT15				ELK3
	RANBP17	CFD			ERBB4								KISS1R				KLHDC4
	CPLX1	PPARGC1A			SPACA3								ICAM5				PCYT1B
	NT5C	SPR			MTMR4								FBXO5				EML3
	PHLDB3	PLEKHA6			RAB21								KCNG3				GABRE
	TRIM52	AQP9			PTPRQ								HOXA9				PTCD2
	CHST12	ARID5A			SUMF1								APOBEC3B				SPTLC2
	ARMCX1	FZD5			BTBD11								MCM4				HAX1
	TBC1D17	ZNF80			CREB3L2								PER3				TRIM58
	DGKH	RFNG			NR1H4								KIF15				SSR1
	TLN2	CD163			SASH1								KNDC1				ETV7
	FGF13	ZNF630			POU2F3								PRC1				ZXDB
	LRP10	GPC1			CHRNA6								POLR2D				GSPT2
	SLITRK5	ANPEP			KLHL20								PPP1R15A				CCNT1
	CNIH3	RASSF2			ZFAND2A								CDKN2A				SMCHD1
	NIPA1	BCL3			C1RL								HBQ1				ZDHHC13
	POLR2K	MAP1LC3A			ALOXE3								ABCC6				NUP35
	WDR6	RENBP			TP53BP1								BIRC5				ZNF577
	TEAD2	DOCK5			ZNF35								TNS1				CINP
	PMM2	WIPF1			ROM1								APOD				HEXA
	MAPKAPK3	LRRC45			ATP4B								TRIM8				DNM1
	ETV3	SORBS3			MYOCD								C17orf58				MGAT2
	COLEC11	ELF4			OIT3								GABRD				MID1
	ACIN1	LILRB2			ADAMTS3								MCM3				ZNF77
	PYGB	DNASE2B			PIAS1								RMI1				HAGH
	IFIT3	STAMBPL1			VPS36								FADS1				AZGP1
	PTGFRN	CD48			S100B								VSIG2				CCT6A
	NEIL1	GZMA			FLT1								AZU1				MGAT4B
	GABARAPL2	MS4A6E			MYO1D								RAMP2				TRAIP
	ZNF121	MRPS18A			ADAMTSL5								C1orf112				SLC9A3R1
	SIL1	SLC25A45			ATP1A1								RCE1				NOLC1
	NANS	CRYBB2			SLC27A4								MCM5				PGM2
	KCTD13	GDPD2			KIAA1217								CRY2				PANX1
	L3MBTL3	TMEM68			SLK								SORBS1				TLE6
	CLDN15	PCDH10			ALDH5A1								WASF1				GAS2L3
	CHCHD2	SAMD12			FECH								PSENEN				GABARAPL1
	GCNT1	CD28			GPHN								BIK				CD58
	PABPC3	ZNF605			CCR2								MYRIP				SLC4A8
	COX7B	SLC14A2			DERL1								IL17D				EHD1
	RIF1	OR5P2			EPS8								CDCA3				PRPS1
	LBP	MSI1			PAXIP1								UBE2S				AKAP8L
	C8orf31	OLIG1			PPIC								DNAH17				LRCH4
	MIB1	CASP9			EFHD1								CACNA1E				MOV10
	KIF6	CCND2			PCDHGA7								MTHFD1L				RRS1
	PTPRJ	PSMB10			HIF3A								SASS6				TMEM37
	GNB1L	RNF32			ARMCX2								MTHFD1				IER2
	PPIB	BMP2K			SEMA4F								UNG				TASP1
	LAD1	MAFB			PNLDC1								E2F3				CNGB1
	LRRC59	SOX13			AKAP1								TMEM31				MRPL24
	SLC39A7	SIRPG			C6orf118								PFKP				SEMA4C
	MRPL15	THEM4			SMARCAD1								TMEM130				CMTM6
	DPYD	MTHFD2L			TRIM56								AURKB				ZMYND15
	ELOF1	KCNJ13			C20orf27								PTGES2				C11orf71
	GPR137	TTC8			WASF3								GPX3				PFKM
	RPS6KL1	PTPRC			B4GALT1								MAGEC1				ZIC1
	DYRK1B	IRF6			TIGD2								CKS1B				SLC30A1
	LINGO4	EEF1A2			IMPDH1								CCDC58				MBTPS2
	DRD4	STAP2			DPY19L4								CLEC4F				TFDP2
	ITPR3	CD300LF			ANKRD7								NOC2L				PCSK9
	SEL1L	CD7			HAAO								CCNB1				NOX5
	RSBN1L	P2RX7			SUPT3H								NEDD4L				TTC7A
	SLC25A13	PLEK			LDHAL6A								CEBPD				TLR3
	NT5E	LBX2			PDHX								BUB1B				WFIKKN1
	FCHSD1	MMP25			LHFPL3								LRRC61				KLKB1
	ANKRD24	GLRX			CNIH2								SOD3				BRI3
	CCNG2	TSC22D2			DDX28								STIL				EEF1E1
	ZDHHC15	FGF12			DEFA5								RPL39L				TUBAL3
	FAM83E	RAB26			ZNF250								CCDC77				SSR4
	LLGL2	HAVCR2			PCGF3								PDCD5				GNG12
	KCNS3	P2RY10			HTR3C								ELOVL6				OVCH1
	BACE1	IRAK2			PDIK1L												PTK7
	PLAC4	TIFAB			TANC1												SCO1
	ZNF251	TNFSF8			IL5RA												FZD8
	GRIA1	GYG2			ADAMTS4												PXN
	CCDC28A	HLA-DQB1			RCOR3												PDSS2
	WDR81	GPR18			TNFRSF8												CKAP4
	CCNG1	CPVL			EDARADD												PKD1L2
	AGXT	UBE2L6			IFITM5												CSRP1
	ACOT11	PNRC1			SLC16A1												ETV5
	LRRC57	KCNH2			NDST1												HMBS
	NKX3-1	EGFL7			SHOX2												FES
	MED25	PRAM1			USP37												SYTL2
	EIF2AK3	TCEA2			SPRY2												OAT
	FRAS1	SLC29A4			STXBP5												MOGAT1
	MITF	EDA2R			PLXDC1												CTTN
	PSMD14	SAMD9L			ARX												ARF3
	WDR60	DVL1			GPR108												PIK3C2A
	ELF3	KCNJ2			STAM												LRRC2
	IL31RA	GAS2L1			COG6												ALDOB
	ALPK3	SLAMF1			EPB41												SLC19A1
	ABCD1	HHAT			METTL1												CCDC127
	PKIA	UPK2			SLC35A1												CTSD
	SLC25A23	BBC3			MDM2												FOXC2
	SLAMF9	IL4I1			SMPD3												CD276
	G3BP1	PLAUR			HSD17B12												ZNF217
	EDN2	POLD2			BPESC1												UBR1
	TRPM4	SPOCK3			RFX3												TRIM32
	SUMF2	PSME2			HSDL1												OXCT1
	SKIL	ADPRHL1			XAGE2												SLFN13
	GDF11	KRT23			GTF3C5												DMWD
	DTX2	CMTM2			FABP1												CELSR1
	CPNE7	GPNMB			PTPRK												ZNF442
	LMTK3	IFIT2			AASDH												HOXA7
	PABPC1	ZNF691			ADAMTS17												BCR
	DYRK3	CHST10			NCDN												TFAP2A
	SYVN1	IFNGR1			DNAJB9												CALR
	SULT1A2	DGKA			AMDHD1												AFF4
	PLAC8L1	KMO			TMEM106B												CAPNS1
	MAPK15	OAF			BOP1												PEX1
	SLC2A4RG	CLUL1			KLHDC7A												IER5L
	RPL23	TPTE2			BRPF3												GPHA2
	DNAJC18	NCF4			SPEN												ZNF526
	CDK10	DUSP2			PALMD												TNFRSF11B
	TMEM79	BATF			TBX5												SEMA3E
	PROM2	ZNF677			NEGR1												AKAP10
	CD5L	ANKRD13B			HMGCR												GLO1
	KCNQ5	RAB37			TJP1												TMEM186
	DDX49	SNTA1			NNAT												SFMBT2
	FADS6	GBP4			SLC7A3												AKAP6
	AMIGO1	ASB16			RTN4RL2												RDH10
	IQSEC2	CTSW			TTC32												XPOT
	HMGN2	WNT2			FOXK1												DAPP1
	TSPAN15	GBP1			PLA2G4E												NUDT2
	DBP	PROK2			TSPAN31												SEMA6D
	RPS4Y2	ZNF418			CAP2												BBS4
	SETD1A	OSBPL1A			CNTNAP4												MYCN
	TSPAN13	APOBEC3F			DNASE1L2												MYO7A
	MYBPH	GALNT7			RPS6KA6												RASL11A
	RABEP2	ARHGAP25			THEG												MAP4K3
	DR1	TMEM71			ZNF331												EBP
	ZNF444	LDHC			JMJD1C												HERC3
	AIP	TXK			PARVB												SYMPK
	IDH3G	DUSP5			TRIT1												PDZD8
	CLPTM1	APOC2			GABRB2												MPZL1
	PILRB	C15orf48			NGLY1												ZNF347
	PPP1R3E	PPP1R16B			TBC1D16												CTTNBP2NL
	LLGL1	PIK3CG			SLC4A4												FTSJ3
	HEMK1	RANBP3L			FOXE1												PKP3
	ZNF226	PDE7A			AR												MED19
	PLXNB3	CLIC2			APC												MTUS1
	BTG3	MNDA			XCR1												ARHGEF5
	RBM33	CD68			GP1BA												QTRT1
	BCORL1	PTGES			FIBCD1												DECR1
	ZNF34	NKG7			AMOTL2												CLCN5
	EFNA2	GPAA1			C15orf39												AMACR
	ARL4A	GPR84			DEGS1												ZFHX4
	PRG2	TRIM69			BTNL3												PPP1R1C
	LDLRAP1	ZBED3			CTDSP2												C3orf14
	SVIL	MSR1			SH3TC2												VIPR2
	GRIPAP1	LAIR2			OMG												HMCN1
	GSTCD	GUCY2D			SYNGR2												GADD45G
	RAVER1	DOK3			ALG6												ZBTB41
	FOXD2	HLA-DPA1			RIMS1												BVES
	CHST11	TRAP1			PON2												MX2
	NTS	FCGR1A			UTP14C												STAT6
	CPA6	NTN4			IQGAP3												HOXB4
	NR3C1	KLHL6			SEMA6B												PHKA2
	PYGL	BASP1			ADCK2												FAM107B
	SMAD7	CHRNA9			TRAM1												LRIG3
	ZHX1	MT2A			DSCR8												SRR
	CCDC40	FIGN			PARVA												SERPINA1
	KPNA2	KLRC3			NKX2-3												SMU1
	RRM2B	NAALADL1			NUP107												SEMA6C
	ARL6IP1	F13A1			USP10												ZSWIM4
	COLEC10	GRM4			CLDN16												DCP1B
	SLC23A2	TMEM9			ARV1												MAGOH
	GABBR1	ERN1			MAP1LC3C												XBP1
	REN	RIBC1			ACVR1												NUDT9P1
	AMT	KCNC3			EI24												LRRFIP1
	SDC1	BFSP1			UXS1												HES4
	HDAC9	ANKRD9			GJC1												CDH20
	PLEKHG2	TM4SF19			MGST2												STK39
	PRKCD	SPP1			TMEM43												THOC2
	CCL20	UGT8			GATAD2B												ABCD3
	WFDC2	CAMK1			CHRNE												PPP1R9A
	PIGQ	MAP4K1			CPEB4												ANXA2
	GNAI3	GFI1			HELZ												COL9A3
	KIAA1586	CD2			COQ10A												CLDN9
	PLXNB2	ST8SIA4			MTAP												TTTY10
	OBSCN	FGR			MIA2												LMLN
	NOL9	ZNF236			EHBP1												PIWIL1
	PDGFD	KIAA0895			PTBP2												PER1
	HAS3	CTNNBIP1			BAZ1A												WDR53
	HIC2	CD247			HERC6												SNX13
	NFIC	PPARG			TRIM2												GSTA4
	ABCC3	TOMM40L			ILDR1												IL18
	MSN	ADAM28			FLJ20021												TLN1
	IRX1	B4GALNT3			HMX2												ANGPTL7
	CYP24A1	STYK1			NDRG4												SLC9A4
	RNF122	CD80			ADAMTS19												LSM11
	SUPT5H	ARHGEF6			MAGEL2												CA9
	NISCH	TUBB6			LEPROTL1												SLCO3A1
	TXN2	MEI1			OLFM1												FOXA1
	THEM5	LTA			PITPNM3												B3GALT4
	ZFP36L1	MEOX2			COX6C												AGRN
	LRRC55	MLF2			IQSEC3												ARMCX6
	GALE	CPNE5			ZNF718												TSFM
	ADRA2B	KHDRBS3			PADI1												RAB11B
	GLT1D1	MS4A4A			PRPSAP2												MBTD1
	TNNC2	SLITRK6			BTNL8												MYL5
	STX16	FBXO46			RP1												HTATIP2
	PNPLA4	TRAT1			ACTRT1												TRMT1
	ZNF233	GSTK1			ANKS1A												C1QBP
	CHD6	CCDC68			CPNE8												ENOSF1
	TTC17	PDCD1			SIGLEC6												B3GNT7
	PLCL1	GPR132			LRP12												BCL10
	OGFR	DNAJC12			GDF6												LOXL4
	TMEM117	ZNHIT2			PGBD1												IRF3
	KCND1	CLGN			ABHD3												GATA5
	CILP2	IL18RAP			CEACAM1												SLC38A5
	STEAP3	CSTL1			TIMM50												PITPNC1
	ZNF462	VPS37D			RABEPK												PLCB4
	EPHA10	MFSD1			IER5												C2orf15
	ZNF516	FMO4			KCNE2												PNKD
	ARHGEF19	STAT5A			UBQLN2												MAP3K5
	ERC1	KIAA1522			WNT5A												AP2B1
	FSIP1	DSCAM			TUBGCP5												TACR2
	PNMA3	TAGAP			SLC16A11												A4GNT
	HMGN3	CDH4			ZNF45												DET1
	HPSE	AGTPBP1			LMBRD1												GNRH2
	RNF43	FCHO1			MALT1												TGFB1
	SH3YL1	LST1			ZNF714												RHPN2
	SOAT1	NUMBL			GRIN2A												ELOVL1
	BTBD3	CLK1			PCSK6												PRKD2
	DLG5	PTPRF			TGDS												PLS1
	NPR1	FCRL5			KIAA1671												CASK
	GBP3	IL3RA			SFMBT1												OSMR
	PRSS27	RGL3			RASGRP4												LTB4R
	LDLRAD3	GNLY			DOCK1												SPRY3
	RAB24	TGM2			PTPRS												CDC14A
	BMP1	ZBED2			DNAJC3												NOTCH3
	NOD1	HLA-G			CHRNB1												SOS1
	ZC3H15	IL7			CYP2J2												SCN1B
	TNFRSF10B	PCBP4			PCDHB6												HSPH1
	BAIAP2L2	MID2			CNOT3												BDKRB2
	PARP3	NMT2			ACO1												SRP54
	PRTFDC1	TLR7			S100A1												LRRC8A
	C9orf72	P2RX1			CBR4												ZNF562
	ABHD14B	WARS2			PSEN2												C1orf53
	PLD5	STXBP4			DNAJC6												TNFSF14
	AKAP12	TMIE			TAF7												ADAMTS12
	LENG8	TRMT12			XYLT1												COMMD10
	DUSP8	TSPAN11			IGHMBP2												ITIH3
	EPS8L1	STK32C			PYGO1												HEXIM1
	YBX2	TMEM54			CBFA2T3												SPCS3
	DHRS1	FMNL3			HRG												ISG15
	IDS	IL1B			TMEM109												TMF1
	ZNF43	ADH5			TEAD1												PCDHB3
	SCHIP1	PLEKHF1			NPY1R												MAPK12
	MINK1	CXCR3			KIDINS220												ZNF253
	FRK	ZDHHC16			TAS2R43												ARVCF
	RPS28	PRRG2			TMOD2												PCK2
	RAB18	DPEP1			MTR												TOB2
	MYH9	MEFV			SDC4P												QPRT
	FNDC4	RASSF5			HOXD9												HIBADH
	AMH	TRUB2			MEGF10												PPP2R3A
	GPR143	WIPF3			ABCB10												MORC3
	KCND2	FGFR3			DUS4L												ADRA2A
	RHOV	GZMM			CHMP2B												C11orf45
	LPIN3	FKBP11			GNE												TOM1
	TACC2	TMEM106A			RNPEP												SCAP
	INTS1	SLC9A3			ZNF502												SLC11A2
	ZNF570	CTSS			ZNF596												HMG20B
	NDUFS2	ZFP36L2			SLC35E3												DNTTIP1
	PRSS8	ISG20			TNFRSF10D												JRKL
	CDYL2	MYO5A			TTC16												C6orf136
	DUS3L	PPM1K			CLC												BAIAP2L1
	CNOT2	SMUG1			AKAP11												KCNN4
	PTK6	PCDH7			RALBP1												JAG1
	MAN2C1	CHRM1			TREML2												HIBCH
	SERPINF2	OCLN			MDC1												ZNF454
	DLEU2	SLC25A10			AMMECR1												MLLT3
	UTRN	LYN			KNG1												SDK2
	PLEKHG4	TAF6			CCL4												TP53RK
	TERT	GPR82			SLC35F5												BFAR
	RPS4Y1	ZBTB7B			CA14												RBM39
	EBF2	SH2D1B			IRS4												NUBP2
	YKT6	FAS			TNXB												EHF
	DLD	IGSF9			PELI1												POLE4
	APH1A	PEX11A			SLC23A1												FER
	ITGB4	CDC42BPG			PLEKHA1												PIK3R4
	PPAN	BIRC3			TPH1												PPP1R12C
	ARID3A	PAX8			COQ3												POLDIP2
	PTGFR	CD160			TMED1												ESPNL
	NT5DC2	DLK1			ENPP1												MAP1B
	YEATS4	GPR39			DUSP16												GBE1
	CCDC57	HMGA2			KLHL14												DEFB1
	SDHD	HPCAL4			PREP												ASPH
	MET	C16orf54			SLC35F2												TDRKH
	ABCG1	CCR6			CYB561D2												MRPL49
	RANBP6	RGS16			P2RY2												DENND2A
	PRKAR1A	MAP3K1			CDSN												WSB1
	USP6	KLRG1			ZNF587												ACO2
	PIP5K1C	MPST			P2RX5												DDX27
	DCXR	ASPHD2			NOS1												AGTR2
	RBM6	NPL			SREBF2												STRBP
	ZNF749	SGK2			CHML												TOR1B
	GAS8	NR0B1			NFIA												ETV1
	ZNF692	CPSF6			HTATSF1												CHCHD6
	ADAM15	PPM1M			RFWD3												PLA2G2D
	ENPEP	CIITA			VGLL1												HCG4
	LZTS2	SERGEF			IFITM4P												ZNF682
	CPE	TMC8			CLU												PDE8B
	STX19	CAPN14			GPR15												PGR
	CXXC1	CLCN2			ELOVL5												ZNF626
	RPS18	KCNA3			MYLIP												FAM78B
	NARF	B4GALT2			POU3F2												PCYT2
	SH2B1	PCDH9			ABHD14A												SLC35D1
	ROCK1	VAV1			SIX3												TBL2
	DAZL	TM7SF2			EFNA5												SLC3A2
	MT1H	SLC7A4			LACTB2												BMX
	ARL4C	SAMD3			FBXO34												PPFIBP1
	ZNF117	TAP2			C11orf65												RALGPS2
	PRKCZ	PXK			OSBPL10												KCNK1
	AGTRAP	KRT8			KLHL11												MTSS1
	SALL4	CYBB			EPGN												XK
	CRISPLD1	ETV4			SLC17A5												GCG
	LFNG	TAPBPL			PCMTD2												ATP1B1
	AP1G2	TMEM53			ZNF319												SLC43A1
	TRPM6	NMNAT2			PCDHB11												ZNF91
	SEC24D	PRUNE2			NSDHL												CRMP1
	WWTR1	NINJ1			KCNJ10												ARHGAP26
	PMAIP1	ACVR2A			HPSE2												TMEM121
	PTP4A3	HAPLN3			LHX6												KIF5B
	PCDHGA4	RPS27L			CLEC2L												EIF5A2
	NAV2	TUFT1			KIF24												MARS2
	SLC2A10	LAT2			JAKMIP1												SPSB1
	TCP11	HOXD10			ZPLD1												SLC1A4
	RAI14	HDHD3			SPACA4												SORD
	CDC42SE2	FUT1			TGM5												ZNF320
	ESCO2	CSF2RA			VGLL2												DERA
	RHEBL1	ASPSCR1			TBX20												ANKRD45
	FER1L4	MRPS21			ILVBL												MRAS
	ADAM9	ECHS1			CIB2												GLRB
	SECTM1	CD209			ZBTB3												HCN1
	INPP4B	CD8A			KRTAP3-1												KIF7
	PARD3	RAB33A			LANCL3												MTM1
	MEG3	PHYHIP			SLC13A3												CLCN4
	RPS6KA5	FXYD5			NDST4												CALCR
	CXCL1	KLRG2			TWIST2												INHBB
	TMCC3	ZNF629			GLP2R												GDPD5
	AK7	STEAP2			FZD7												CD9
	NUCB1	IRF2BP1			EDEM3												C12orf4
	TBC1D14	OAS3			EFCAB2												ZNF93
	RASEF	MAST1			MRPL52												MRPL14
	UBAP2L	DKK4			ST8SIA6												RIMS3
	CLSPN	PIK3AP1			NIPBL												GDAP1
	RBM7	PCDH19			TNN												RDX
	NF1	STAT4			SORCS3												RAB13
	PFKL	UCKL1			GUCA1A												CYB5R3
	TLE1	GRHL2			ZNF329												PELO
	RAD21	OAS2			ZPBP2												ARSA
	ZNF229	SIGLEC9			TBL1Y												GLYATL1
	MAP4K2	FBXL20															RAMP1
	APLP1	JSRP1															MPP6
	ZNF573	OSBPL3															LIMA1
	ATP6V1C2	EPB41L1															ZBTB38
	ARMC9	GRIK5															NR1D1
	ISL2	PVT1															ZIK1
	PLCXD1	DENND2D															IL11
	MRPL1	ZNF7															SLC25A40
	MTTP	OSCAR															MAP4
	CARM1	RHBDL1															PEG10
	DNAH1	PASK															CYB5R4
	MRPL13	ZNF696															ITGAV
	LRRC34	ZNF232															RAET1G
	TSPYL2	CLYBL															SLC41A2
	TRERF1	CTNND2															LMBRD2
	FOXRED2	NEO1															RNF113A
	ALDH1L2	ACVRL1															CCDC15
	SCN1A	SLC26A4															EGFLAM
	MKS1	ST6GAL1															CHPF
	FDXR	RHCE															MRPL36
	CPSF1	ABCB1															IL10
	KRTCAP2	ADA															MFAP1
	EGLN3	IFI27															PRDX4
	FREM1	IGSF3															SLC9A3R2
	CASP6	WDR24															DCLRE1A
	PPP2R5B	ATP6V1B1															SYNE1
	FBXL15	SCIN															NUDT19
	FAM41C	SYK															OCA2
	B3GALNT1	KSR1															CLSTN3
	NPEPL1	GCAT															C19orf33
	CGN	SELPLG															HOXC9
	KPNA3	ELMO3															DNM2
	LRFN3	TTYH2															NETO2
	MCAM	STX2															SPINT2
	TJP3	CSF1R															KRT9
	SLC2A8	SNPH															PCBD1
	HOXD8	SLC17A7															NDUFS6
	C19orf18	PACSIN1															BCL2L14
	ZC3H3	TBKBP1															ABCB8
	SUB1	SOX11															ACADS
	PTTG2	ADRA1D															CCT2
	CLTB	RND2															TIGD1
	AZIN1	TMIGD2															PAH
	TFRC	KDR															LZIC
	PRSS33	FGL2															RBM10
	CHD7	SRGN															FOXC1
	HYAL2	C1orf74															IMPA2
	ALDH3B1	EFNA1															USP43
	CORIN	CDH26															STARD3
	CPB1	CXCR6															TSPYL4
	PPP1R3G	ABHD6															NUDT13
	COL27A1	ARMC5															SMURF2
	HOXC12	ZC3HAV1L															RAB3D
	ADCK1	GPT															VKORC1L1
	ART3	FRMD4B															CEACAM21
	CPNE1	RARRES2															ZBTB44
	PRODH	CABLES2															RPL32P3
	DEK	SLC37A2															IL17RC
	CDH10	ZMYM1															CLIP2
	TBC1D24	PSD															MAP3K14
	CXCL3	PTGER4															P2RY6
	EDIL3	LRBA															PBX2
	FOXH1	ICAM3															TRAF1
	HGS	ARHGEF18															DLX2
	ADPRH	EPHB3															SATB2
	TIMM9	ITGAX															ARHGEF9
	ADAMTS18	CAMP															TFB2M
	ST6GALNAC5	ABO															WDR13
	SEC24A	TMEM38A															STK36
	EPB41L4A	RTKN															TSSC4
	P4HA1	PDCD1LG2															HOXC4
	DNPEP	LAX1															CYB5R1
	FBXL7	ZBP1															IDE
	PRKRIP1	JPH3															NR1D2
	PINK1	C1orf162															JUND
	GLUD2	RBM11															HSPA1B
	RPA4	ACRBP															DLEU1
	ZNF33A	RAB8B															RTN4R
	AHR	TFPI															SHMT1
	ANK2	SPIB															FASTKD2
	ANKS3	RSPO3															NEU1
	NANOS1	INPP5D															NUDT5
	BLMH	PRPH															ALG14
	HDAC10	KIAA1549															MLYCD
	GNB2	SMG5															SLC29A1
	EHD3	C3orf18															REXO1
	ATP9A	PTGS1															FOXN4
	TSPAN2	TRIM21															MICA
	GPR176	SFXN3															CDA
	CCT6B	GMFG															STOML1
	SNAPC2	PADI4															HMGCS1
	NGFR	SLC7A2															VAV2
	CLDND2	RIPK4															TPD52L1
	SH3GLB2	CHRD															SRMS
	PSPC1	RIMS2															TAF13
	EPHA1	C1orf127															HCFC1R1
	AHI1	SOD2															RAB38
	ARHGAP23	ZNF165															SLC43A3
	PLCD1	HSD11B1															GABBR2
	MCTS1	SLC29A3															SLC35B2
	SPIRE1	ZDHHC9															CLDN12
	RASGEF1B	VAX2															DMD
	ADAL	CYSLTR1															PDE1B
	PDE4A	DLG3															ZNF223
	HS3ST6	GREM2															DSG1
	DIXDC1	BRSK2															CAPN1
	HSD11B1L	SAMD13															SNX5
	SNORD36A	MGAT1															ERF
	SFN	SYNGR4															FSTL3
	POLR3F	CFHR3															ZNF367
	MAPKBP1	PIK3CD															PSMD9
	TNFSF11	UCP2															LEP
	CREB3	MYT1															CDKN2C
	UNC5CL	HPD															MC1R
	WNT3	PDLIM2															NIPSNAP1
	ISOC2	FRMD3															CMA1
	MED18	LBH															PLEKHG3
	KLHL24	BAIAP3															CASKIN2
	TXNL1	DPP10															TM2D1
	TMEM176B	LPIN1															NBR2
	TXNDC9	GOLT1A															PCDH17
	FJX1	SNX8															PCDHGA3
	MIB2	MERTK															ZNF432
	ARHGEF17	MYO1F															DOK1
	NME4	C1QL2															RYR1
	CRYGS	GPR158															SPN
	P2RY1	SCNN1G															USP28
	ZDHHC23	OTUD3															SLC27A5
	MMAA	CPS1															THAP8
	NUDCD2	GMIP															SEC23B
	TNFRSF25	PRRT3															GSN
	KCNK13	MPP2															TDP1
	ME1	KLRF1															GDPD1
	DUSP23	CD72															MANEA
	ASPHD1	NCR3															TOM1L1
	POU6F2	PFKFB2															DCAKD
	ZNF485	ST8SIA1															TTC19
	DSCAML1	CYHR1															STS
	TMEM104	BNIP3															RSC1A1
	CSAD	IL2RB															GPR160
	THRB	ZNF671															MMP13
	TSPAN14	PLXNA2															BRAF
	STX8	HCK															ADCY7
	CDK5RAP3	PAG1															ENPP4
	ACADVL	RAPGEFL1															ANGPT4
	SET	C3AR1															OXER1
	FAM98C	DLX3															ENDOG
	BBOX1	ATP8B4															SQLE
	PTMA	PCDHB13															TFPT
	ATF1	ATP6V0C															TRAF5
	ZNF805	ARSB															NXF3
	ZNF222	ALK															ACBD4
	ABAT	ITGB7															EHHADH
	PAQR6	GALNT5															GLB1L
	MYH3	SURF2															STAU2
	CHURC1	BARX1															TRPV6
	PMS1	SH3BGRL3															AGPAT4
	HEBP1	BHMT															TDRD9
	ISCA1	SLC9A9															UBQLN4
	GYG1	ASH1L															PDE4D
	CXCL5	MATK															MFAP3
	TMEM45A	OVOL1															MEGF8
	ZNF649	DISP2															THAP4
	SPRY4	COL24A1															VSIG1
	IKBKE	TMEM25															PDE9A
	CLN3	ZNF300															MAPK11
	PTPN23	SIGLEC8															TWSG1
	SAT2	IFI35															JOSD2
	MLXIPL	NTHL1															LMBR1
	NEBL	TMEM119															FCAR
	C12orf29	DLGAP1															SLC25A29
	ANXA2P1	RSAD2															STK17A
	MST1R	FLNB															ZNF430
	SNORA33	ENTPD2															LRFN5
	OR2A9P	CD38															UTP20
	ALDH6A1	NAV3															STT3B
	VLDLR	BTN2A2															ZNF717
	ASL	MAF															MYO3B
	E4F1	ACMSD															ZMAT3
	LIFR	LPXN															KITLG
	ZC3H12A	ELL3															IPPK
	FOSL2	OLFML3															SNAP29
	SEMA4A	PACSIN3															THOP1
	JAK3	CD14															ZGPAT
	UBA2	BLK															IQCC
	MTG1	ATP6V0D2															TMED9
	TRIM63	SERPINE1															MYH1
	KERA	ZNF215															HOXB7
	SLC27A6	PSD3															SLC8A1
	AMIGO2	TKTL1															NPTX2
	GNAZ	HAL															GRB14
	PPP1R13L	NLRP3															PARD3B
	CREBL2	PTPN7															MANSC1
	AMOTL1	MARVELD2															XKRX
	CCDC22	ZNF572															OPN3
	PKD1	KLK14															GALNT10
	CHID1	CD79A															SIAH2
	BCL6	DAB2															OXCT2
	PSMA3	CYP27B1															DENND4C
	DDB2	CD3E															RHBDL3
	RBBP9	TMPRSS13															AATK
	CLMN	AIF1															EBPL
	ZNF501	C1R															SRD5A1
	ZNF219	GPR174															SNORD48
	CCPG1	GRB7															FFAR2
	PLOD2	RPH3AL															MT1E
	ATP6V0A1	NANOS3															DBN1
	VWA1	PAEP															TSPYL5
	HOXB9	WDR17															SLC25A37
	SNX12	KLRD1															UBE2W
	HELB	NCKIPSD															PTK2B
	BACE2	SIX2															LAPTM4B
	EPN1	RBP5															FUT6
	SMARCA4	FBXL2															USP13
	NCK1	TBC1D10C															ITPK1
	ALMS1	SPOCK2															PHTF2
	ATP13A5	SH2D1A															XAB2
	GOLGA8A	GPSM3															VENTX
	C5orf34	CAMTA2															SLC1A6
	SNED1	WDR31															RAPGEF3
	SLC26A2	NT5M															ZNF311
	ALG12	PLA2G2A															MRPS23
	KIF12	ZNF101															KCNJ16
	DGAT2	FMNL1															CDCA7L
	ICAM1	KCNMA1															PRRT1
	ALDH16A1	ARHGAP9															YPEL3
	HADHB	DENND1C															MYCBP2
	PCDHB10	OAS1															PDE4C
	RHBDD2	TRIM47															FKBP2
	ZNF330	KIRREL2															CLEC4E
	SYNGR1	PRDM1															RXRG
	ACSS1	OVCH2															SPTAN1
	ULK2	LHFPL2															SLC17A3
	LTBP4	PODXL2															RAG1
	PAPPA	RASGRP3															TOP2B
	ZNF90	DPEP2															HDAC6
	NGB	FGA															RAPH1
	PASD1	AMPH															SIPA1L1
	TLE2	IGSF6															DCK
	SMYD3	ITGB2															CHCHD1
	LARP6	CDH16															ARFGAP1
	GRHPR	SNAI3															WNT9A
	BCL2A1	TNC															ZNF14
	NRCAM	GPR3															SLC5A3
	CARD10	CASP5															ZNF595
	MYO1A	ADCY3															ENO2
	MSH2	CYP1B1															SYT5
	SLC1A2	CDK2AP2															SLC39A11
	NDUFS7	RAB15															TIAM2
	OR2B6	LCP1															LCMT2
	BTBD1	FGD3															DHRS4L2
	KLF11	CD22															ATF7IP2
	PTGES3	PARVG															SLC10A3
	NOL10	BTK															PHOSPHO2
	SLC16A14	SLC16A6															DRAP1
	PGPEP1	SERPINB9															C1orf115
	RHOB	CCR1															CDC42EP3
	KRTAP5-8	ATP11A															PCSK4
	CD164	SELE															LRRN1
	IDI1	SLC40A1															RGS13
	ADM2	RASL10B															CBX4
	KRT7	FGD1															SOS2
	ZNF701	C1orf54															FADD
	TSEN54	DHRSX															GOLPH3L
	FUNDC2	DERL3															C9
	TMED7	BATF2															EZH1
	USP9Y	MLKL															MOCS3
	EPOR	ALDH1A3															CD24
	GALNT6	BCL2															NPAS2
	GCM1	PRF1															NEIL2
	CRY1	GNG2															KRTAP5-7
	NLGN4Y	U2AF1L4															NARS2
	MKNK2	GLI1															BET1
	ST3GAL3	CA8															EGR4
	SMAD1	FCRL4															SCD
	GAA	TTC6															FTCD
	LRRC52	TTLL7															SCRN2
	AP3M2	KLF7															TBC1D5
	FLJ42393	PIM3															NET1
	PCP2	SLC4A7															CXCL16
	ELAVL2	WNT4															FUT2
	ZNF552	ABLIM2															NDUFB6
	GALNT14	C1QA															SSH1
	MT1G	ETNK2															F2RL1
	GAN	PLCL2															CCDC69
	MED9	SLC25A18															TFPI2
	CSNK1G2	SULT2A1															MAPK13
	GALNT1	ESR1															TRADD
	TRIO	DMGDH															SLC30A2
	ISOC1	SIRPB1															LRRC8D
	VPS37B	GOT1															RYR2
	CLTC	LGALS1															RIN1
	C1orf43	MAN2B1															MUC16
	B3GALT2	MAP3K9															PCDHB19P
	FCRL6	KLF12															PMPCA
	SRGAP3	PVALB															EIF2AK4
	MAPK3	CXCL11															RPL28
	REL	CYP26B1															PRKCSH
	ZNF224	GZMK															TMEM45B
	SH2D4A	TOMM34															SUCLA2
	ARMCX4	RTN1															COBLL1
	MGAT3	BANK1															ATF6
	SLC22A18AS	CLEC2B															C8G
	SNX21	MMP19															STARD3NL
	BCAS4	PSMB8															TIMM17A
	USP36	MESP1															ZNF335
	ALOX12P2	SV2B															PLS3
	LDHB	MCOLN1															PANK1
	TDRD3	DUSP4															ADAM10
	LAMA5	TMC4															AUH
	ATP6V0B	SLC2A6															HAGHL
	GSK3A	IRF4															TGFB2
	ZNF609	CLEC4A															ZNF503
	LSM5	SLAMF7															ZNF704
	PKIG	KIAA0753															ATXN3
	TCP1	PTPRO															KAZALD1
	ATG5	NOL3															TNFSF9
	ELOVL7	ALOX5AP															MDK
	PLG	CSF1															LDOC1
	SYNGR3	RHBDF2															VASH1
	GPR22	FASTK															PCDHA4
	ZNF484	PTAFR															ACE
	C10orf55	NRP2															ZNF160
	EEF2	GJA5															WDR18
	BBS9	S100A8															SLC16A12
	PHLDB1	HLA-DRA															NRXN2
	KBTBD7	DTX1															TMEM11
	LTBP3	TNFRSF13C															NAPG
	ALDOC	ZNF114															R3HCC1
	ITPKB	DNAL4															RGS17
	ARHGAP28	CCL25															SLC27A2
	PCDHB15	LIPA															IMMP2L
	MAST2	KCNF1															SCN9A
	CSMD1	SKAP1															ATP8B3
	MLLT11	FNDC5															TBC1D2
	RDH16	TMEM51															ARRDC2
	ZNF254	BTN3A1															FZD1
	TMEM105	CREB5															XKR4
	BMP6	SLC10A4															TAF2
	ARMCX5	MRC1															C11orf1
	SIAE	IFIT1															CACNB1
	SCUBE1	RASGRP1															RBL2
	CLEC4D	DHX32															PCDH20
	ZFY	RNASE6															NUBPL
	MRPS18B	BST2															IRF7
	EVI5L	EVL															NLGN1
	RPN2	THSD7B															COX11
	SEMA3D	CD83															MESP2
	SSBP3	PLEKHB1															DOLPP1
	NDE1	PAPLN															PAX5
	PRKY	SERPINB1															IGFL3
	SPTBN5	TRIM48															TIMP4
	SPATA20	GRIA2															KTI12
	SYT8	PIAS3															CD99L2
	PSD4	LNX1															LYPLA1
	WDR27	CLDN6															THNSL1
	SNAPC4	MAFF															GCNT3
	DOC2B	PAK6															ITGB1
	NUDT15	PEX6															CRIM1
	FLYWCH1	UNC5C															PRDX3
	GSTO2	SLC1A3															ITM2C
	ADAMTS6	IL18R1															CECR7
	ACAA2	CYSLTR2															CANT1
	IL1RAP	GIMAP2															CETN2
	AADAT	FCGR3B															ZNF416
	HOXD13	CHRNA1															NFKBIA
	FLRT2	FAM53A															RUNX1
	MAN1A2	KCNJ12															TRIP10
	LUC7L	C1QL1															ATG16L2
	MT1F	HLA-E															FTO
	TYRO3	PTK2															C12orf49
	SKAP2	LSR															MID1IP1
	NRXN3	RIN3															SNAPC1
	FOSL1	PDIA2															SCEL
	TRIM65	BTBD6															TCEAL1
	SYT16	PPT1															MCM8
	SPECC1	SOX3															ZNF483
	MMD	HOXD11															SLC35A3
	SAV1	PMCH															TRUB1
	ACAA1	CBLN1															OVGP1
	WNT7B	DNASE2															SLC30A3
	TRPM8	PLEKHG6															SDF4
	EDA	PPARGC1B															TRAF2
	LIN7A	PLAGL1															CHD3
	PLEKHA7	ARRB2															TGIF1
	HK2	FAM83F															FAM3C
	STK38L	TNF															PUS7L
	B3GAT3	SLC7A7															ALDH18A1
	SH2D2A	ACACA															MAPRE3
	CHCHD7	KCTD17															ELL2
	ANP32E	CLEC7A															GFPT1
	SEPHS2	TBC1D4															PSMA6
	KLHDC1	EN1															CLDN10
	NOL12	GPR68															IPO8
	MYBPHL	ARHGDIB															PCDHGA12
	LRRC1	FRS2															LGALS3BP
	NXPH3	STXBP1															ENTPD5
	SBF1	NOVA1															EGLN1
	CNTN4	HLA-DQA1															ALDH1A2
	HIVEP2	CD300C															FZD2
	RAB42	SARDH															GDF5
	ITPKA	CD3G															RNH1
	HSD3B7	TMEM97															TM9SF1
	CHAC2	CCL2															AMHR2
	PARP6	SSX1															CDKN2B
	AGA	APOBEC3A															WNT10A
	ZNF514	ABI3															PLSCR1
	SLC12A9	BHMT2															ADK
	PARD6A	ITGA2B															SLC25A11
	LY75	TFAP2B															NCKAP1
	ADAMTS5	MFAP3L															HIPK2
	LIF	CCM2															RUFY3
	BDH2	LIME1															NIP7
	GRB10	APOL1															DSEL
	ZNF667	CORO2A															UQCRFS1
	FLNA	ROR1															IRS1
	DIP2C	MYO1G															POU2F1
	PIWIL3	PFAS															AIFM1
	SLC13A2	RORB															DPP9
	RICTOR	INSL4															PRKG1
	CCNJ	TLR10															BID
	NAPA	VPS72															CYB5D1
	ASCC2	DPT															ZDHHC21
	CIT	SLC4A2															SHCBP1
	FARP2	APOH															TIMM17B
	ZSCAN4	TMEM86A															GP1BB
	CD46	CMTM7															SLC22A17
	SLC24A1	SDHC															PTPRU
	GMNN	PARP15															CAMK2G
	PI15	MDN1															MTMR10
	RASAL1	SAMSN1															ACOT4
	AHDC1	TRIM24															SEMA3F
	TUBGCP6	FBXO16															SLC5A5
	PFDN4	KLF13															SPTBN2
	WFDC10B	CD300A															ZNF334
	TWIST1	TNFAIP8L2															HSPG2
	CHAD	PCGF2															LRP11
	SYNGAP1	PTPN3															TSPYL1
	OXT	AQP7															RPS6KA4
	MYO3A	MT1M															ZNF593
	ZDHHC7	CXCL10															SFXN2
	CASZ1	KIF1A															SLC44A3
	SLITRK2	STK4															TESK2
	FMNL2	PLCH1															RAB3IL1
	CPEB1	MANEAL															HOXA3
	SCT	IFI44L															SLC39A6
	SFRP1	TLCD1															SHC2
	SLC16A8	TYROBP															MCCC2
	LRP5L	PLAC8															ZNF273
	GTF2H4	PF4															HOXB5
	HTR2B	CHD1L															LTBR
	ZNF469	LAYN															HOXB2
	FASN	MYH14															NFRKB
	MGRN1	INSL3															XAF1
	PITPNM1	SLC39A4															ACTR5
	CAT	CD63															DEPDC7
	ACHE	SH2D3A															QPCT
	MMP16	PPP1R14D															SEC23A
	SLC2A14	ELMO1															NUDT9
	ZFPM1	NCF1															KLHL5
	QRSL1	LAPTM5															HOXB3
	PPP1R1B	OGFRL1															HSP90AA1
	SACS	HOOK2															GNAQ
	TPCN1	TAS2R5															JPH4
	MMP1	GPA33															PDIA5
	SEZ6L2	GPR137B															MAL2
	ROBO1	FLI1															ARSJ
	COL9A2	VSIG4															ZNF292
	TMLHE	CHRM3															ZNF358
	SF3B4	TFR2															BARD1
	SMAD9	SOX12															ARHGAP10
	LYST	CLEC4G															DOK5
	ATXN1	PFKFB3															PMF1
	ACSS2	KCNK12															SEMA7A
	PPP2CB	DNAJC5															RNASE4
	PPP2R2A	TNK1															HIP1
	MRPL48	TP53INP2															SLC6A1
	NAPB	PDZRN3															FKBP1B
	C8orf48	CABP7															FZR1
	METTL7B	MIXL1															SPAG7
	TNFRSF1A	APOBEC3G															E2F5
	MAP3K13	VAMP5															PRMT5
	FUNDC1	IL7R															GRAMD1A
	B3GNTL1	LCK															MMP17
	PLA2G6	KRTAP5-9															FDFT1
	SSH3	BST1															RAB11FIP3
	ERBB2	LGALS3															PLB1
	PRMT6	ARG2															KIFC2
	PRELID2	CSN1S1															TRIB2
	TRPM5	NUDT14															CPT1A
	FCAMR	ZMYND8															PMVK
	IGSF9B	ZNF468															TMEM67
	ZNF214	LRRC25															REV3L
	RNF169	FSCN2															SIPA1L2
	TMEM87B	TLR4															MRPL42
	ARID2	DPYSL4															ACTL8
	PSKH1	CASP1															SNORD68
	INPPL1	PKHD1L1															C1orf122
	HYI	ITGAL															IL17RD
	NCOR2	CD4															SCD5
	TBX21	CHL1															HSPA12A
	FGFR2	TMEM116															TCFL5
	CD99	CCR7															C1QTNF3
	NRIP1	HEXIM2															DNMBP
	TAPBP	SHKBP1															PIGF
	AIG1	RNU12															NCOA2
	CNTROB	IL16															SSTR1
	BOLA1	CXCL6															NCOA3
	DNASE1	SCN4A															KLHL3
	SLC7A8	KISS1															SRI
	SLC45A3	BTN3A3															PCDHB16
	ZNRF2	TIAM1															PIGT
	CABIN1	UCN3															FZD3
		RHBDD3															MRPL2
		FPR1															CDC42EP2
		SIX4															SHH
		PCDHB8															ANXA11
		LRRK1															ITIH4
		CCL3															PUSL1
		FTH1															AVIL
		GTF2I															CDKAL1
		HCLS1															FLII
		DPPA4															SNX6
		LY9															PRKCA
		GIPC1															OSTM1
		RASSF4															TAS1R3
		SULT4A1															COMTD1
		GBGT1															UBL7
		ALDH7A1															SRGAP1
		BDNF															PDK3
		C3orf33															BCL7A
		PDE3B															TSPAN17
		NXPH4															CCNYL1
		AMPD1															PPA1
		FANCE															MAP3K15
		DHRS9															PDZK1IP1
		AKNA															ERCC2
		KCNN3															ACSL3
		TCL1A															SSTR2
		ZBTB32															SOX8
		COL11A2															BRSK1
		LIX1															DUSP12
		SIGLEC10															LMAN1
		NLE1															TPMT
		LONRF2															BMP3
		DYRK2															CROCC
		CHODL															SEMG1
		TRPV2															RRAS2
		RIPK3															MAGED1
		STK31															RHBDL2
		SLCO2B1															UNC93B1
		MEIS2															ALG1
		RRAS															HS3ST1
		SYNE2															TMCO3
		APOE															MBD3
		JAG2															APOL6
		ANKDD1A															UCHL5
		SOCS1															PGRMC1
		TEX11															C22orf23
		ARHGAP20															DNAJA1
		NPAS3															ITPKC
		PLEKHA2															VKORC1
		DIRAS1															LARS2
		DSTN															MPI
		PPP1R16A															FRY
		ADD3															KCNK15
		PIK3R5															NDRG1
		ANKH															C8orf33
		DACT2															ADAM33
		LHCGR															HS6ST2
		CNTN1															SEH1L
		SLAMF6															SPAG9
		DMRT2															MTFR1
		ITGA5															SFT2D1
		ALOX12B															UCHL3
		AKR1B1															PDIA6
		FASLG															THBS3
		PTGDS															HS3ST5
		ZNF574															FKBPL
		FCER1G															ZNF513
		TNFRSF4															NXPH1
		SH3BP1															EIF4E3
		KIAA0040															RSRC1
		ERG															THG1L
		ETS1															ABCA2
		HOMER2															MAP3K12
		CD40															CD151
		GABRB1															SLC20A2
		PANK3															CYP46A1
		ATP6V0A4															SH3PXD2A
		HLA-DOB															BARX2
		CRLF1															TOMM20
		CORO1A															PKN1
		S100A9															CCNB3
		GLA															ARL16
		DKK2															TMC6
		PCDH1															SLC16A3
		PLTP															CHRAC1
		ALOX5															MX1
		HMOX1															SPATA2
		MPP1															LRP3
		MUC2															C6orf89
		GIMAP6															GGCX
		B2M															LZTR1
		EIF2S2															SNX9
		C1S															LGR5
		KCNK6															TUBB
		LILRB3															CACNA1D
		PLEKHO1															CCDC12
		IL12RB1															USP1
		RASGRP2															DLL4
		FURIN															HOXC8
		TRIM68															CEACAM5
		HMGCLL1															SPINK2
		VN1R1															FBXL14
		SCN8A															NCAM2
		ZNRF3															DEXI
		LYSMD2															TNNI2
		CTF1															PRPF39
		TPSD1															MICAL2
		PIM1															NTRK3
		LSP1															TNFSF15
		PHKA1															PIK3CB
		EFHD2															MRPS6
		KRTCAP3															TGFA
		LENG9															PENK
		ZNF439															FKBP7
		REEP2															SBF2
		TMEM61															HOXB8
		GAS7															MIPEP
		ZNF594															PSG1
		CAND2															SESN3
		USP40															ROBO3
		PCDHA12															DNAH10
		SLC6A14															FGG
		SLC38A4															CCR3
		OSBPL8															MTX1
		ZDHHC22															PHYH
		MYD88															ATP2C1
		KCNS2															SP5
		MCF2															RAPGEF1
		CCNL2															CBX3
		IGSF21															TWISTNB
		SLAMF8															NDUFB11
		ATP8B1															SLC38A1
		NCAM1															BAG3
		LYL1															MICAL1
		CRTC1															EHD2
		SLC2A9															CHD9
		HOXD4															ATP6V1E2
		AIM2															SLC25A21
		PCDHB5															PDIA4
		STXBP2															MLLT1
		ST3GAL2															TMEM108
		PLA2G7															NOTCH1
		WIPI1															ABTB2
		HSD17B1															FGF18
		NRTN															MYOM1
		CEBPA															FADS2
		PYHIN1															PPP1R12B
		EVI2A															PLCB2
		HSPA4L															NR1H3
		CRELD1															ZNF669
		P4HB															IL1R2
		ESPN															RGS9
		TRIM17															BMPR1B
		PLEKHG5															RTN4IP1
		ANKRD39															FGD6
		ATM															RNF187
		MRPL23															ZDHHC3
		SLC45A1															CPM
		CKB															SP2
		IQGAP2															LIX1L
		TSPAN10															CYP2B6
		HLA-DPB1															LMAN2
		CD53															CCBE1
		HTR1B															PDGFA
		HLA-C															TSPAN6
		PNOC															GPATCH4
		DBNDD1															UNC13D
		IL17RB															CA11
		MFNG															STK11
		EPHX1															ETFA
		CD84															PCDHB9
		HNMT															CCL26
		RTP4															PSMA5
		HYOU1															ELMOD2
		TGFBI															FRAT2
		CPLX2															PCNA
		MYADM															MDFI
		CEL															SDK1
		ZNF408															SMPD2
		GSTO1															ZFAND1
		DNAJC5B															PRKAR2A
		FOXP4															HSPB1
		BCL2L10															PIGH
		SPIN3															NEK6
		ZNF703															USP35
		BPHL															PRRG4
		NFE2L3															GCKR
		CMYA5															CD2AP
		TNFRSF18															C9orf40
		GRIN3A															C15orf41
		CCL5															CPNE3
		HSF2BP															ANKRD44
		TXNIP															SMPD1
		MRPL41															ME2
		NUDT16L1															FUBP1
		SLC6A12															ARFRP1
		APBB1IP															BCKDHB
		PAQR8															VEGFC
		ADCY1															TSNAX
		VANGL2															ABCA7
		STK17B															DSG2
		ATF7															SLC4A5
		TRAF4															CNKSR2
		IL1RL2															ALAS1
		EN2															NEU4
		AP1B1															GTF2H3
		NPDC1															TMEM126A
		MPEG1															SEMG2
		LIAS															PTMS
		C1QC															PPP4R1L
		LRRC8C															HOXC10
		HMGB3															B4GALNT2
		EPSTI1															BAG4
		CCR5															AFF1
		FAM20A															ZDHHC14
		NELL1															SLC36A4
		ARHGAP4															RBP2
		CR2															GPR1
		SYT2															ACAT2
		CMKLR1															SYTL4
		TMEM41B															IER3
		ZBTB39															PLCG1
		CYP2C8															RRBP1
		RAB3IP															CATSPER2
		PYCARD															DAB2IP
		CDH15															TTYH3
		COL2A1															C11orf24
		CSF2															NDFIP2
		CHDH															PLEKHA4
		PIM2															DPM1
		ECEL1															IPP
		FOLR2															BMF
		ODC1															POLB
		NCF2															HIVEP3
		JMJD4															ABCA12
		KRT24															PNKP
		PRSS21															FAH
		PTPRCAP															ZNF710
		GM2A															C12orf60
		CNGA1															PARP12
		ITGA4															LCN2
		STAG3															PTGIR
		FCN1															DCTN6
		AP1S2															SERPINA4
		PKD2L1															USP53
		RCN1															SLC39A14
		HSD17B13															NFYA
		GNAI2															IFI6
		TTLL11															MAP1A
		TMEM156															ULBP3
		TMSB10															HOXD3
		LILRB4															TUSC1
		ADAMDEC1															ARL11
		C14orf119															MMAB
		RNF126P1															CABP4
		ANXA5															ATAD3A
		ID1															DMPK
		CNFN															PRSS16
		SPP2															TNFRSF21
		DKKL1															MMACHC
		PMFBP1															GTPBP6
		SYN1															PGM1
		CD274															RAB34
		RCSD1															MAML3
		GSTZ1															ERP29
		SIGLEC5															PIGW
		CNGA3															PRSS35
		RNF130															IKBKB
		MARCO															MGST3
		PPP1R3B															CCNC
		HS1BP3															ART4
		LEF1															IGFBP6
		GTF2IRD1															ING2
		SHARPIN															RP1L1
		PHACTR1															PDGFRL
		CSK															NUCKS1
		ITGA1															ZNF576
		ZNF569															APOM
		PRAF2															IDH1
		DEF6															NUDT16
		TMEM92															GBA
		VAMP1															NMUR1
		TAP1															OSR2
		PSORS1C1															CFLAR
		ARHGAP30															GALNT3
		LGMN															DMC1
		PIK3C2G															ULBP1
		L2HGDH															CCT3
		HLA-DRB5															ZNF225
		DOCK11															ACOT8
		CD37															PSMD7
		B4GALT3															ALPP
		CR1															CXXC5
		ZNF683															ABHD11
		SLC29A2															E2F1
		GIMAP1															TSPO
		AKT1S1															ABT1
		IL2RA															MAGED2
		PRR7															BCAR3
		APOL3															TP53
		TRPM2															SLC39A9
		EPB41L3															SIGIRR
		TMEM101															LRRC43
		SP140															SERPINB8
		GATA3															CEP290
		F12															SFT2D2
		POPDC2															RUSC2
		LILRA2															HSPA8
		IKZF3															RNF166
		TLR8															EBNA1BP2
		CLEC10A															METRN
		SELL															KCNAB1
		COL8A1															WEE1
		GPR157															ERLIN2
		CARD9															SLC25A15
		PSTPIP2															FAM50B
		TRAF3															PORCN
		BCL11B															DCST2
		BCAT1															RNF150
		GFRA3															RASSF8
		NUDT18															RASSF6
		SNX10															SF3A2
		GADD45A															AGPAT2
		CLCNKB															NDUFB1
		IL15															NAT2
		KCTD8															CDH1
		KCNK2															NUAK2
		NKD1															SLC5A9
		SH2D3C															CLCN7
		GZMB															ZNF563
		HERC5															KLF10
		DAPK1															F8
		SLC2A5															SDHA
		EFNA4															NEK7
		HHEX															SAMD11
		TNFSF13B															TARDBP
		CAPG															RAB1B
		HAND2															SLC35D2
		PLCXD3															PLAC1
		C2															DDAH2
		IL2RG															ADCYAP1
		APOB															MUC4
		TNS3															CTH
		AP1M2															SPRED1
		PPL															APBB2
		SPAG1															MAP2K2
		LY96															PKN2
		SLC44A5															RGPD1
		PLAU															ARMCX3
		GLIPR1															NRG3
		GK															S100A5
		LSS															CIDEB
		OPHN1															TCN2
		CD86															ODF3L1
		C5AR1															TMED2
		EAF2															NADSYN1
		GRTP1															ARL6IP6
		IRAK3															DENND3
		STARD10															PECR
		FOXP2															RAB23
		DIO3															LIPC
		NOG															PPM1F
		GNA15															SULT1E1
		NPAS1															CALU
		POLR3GL															SEC14L5
		SLC25A19															DUSP10
		IFITM3															GPBAR1
		RASA3															MIOX
		KLHL4															RBBP5
		UBE2E2															SLC2A12
		SYT1															RPS6KA1
		DDX43															APP
		TNIP3															SAMD10
		ANXA9															LRRC4
		MRPS26															CYP3A7
		SLA2															CARD11
		DOK2															COQ2
		CASP10															CYP21A2
		NTAN1															KBTBD3
		CXCR4															RIT1
		TTLL12															TSC22D1
		GIPC2															MAGEA11
		SUSD4															GDI1
		RSPO4															RNPEPL1
		FSTL4															DNAJB1
		TXNL4A															PPP1R3D
		THSD4															MRPL55
		TMEM106C															SGCE
		TFAP2D															RNF165
		MARK1															MAGEF1
		LRRC58															ACOX1
		HLA-DMB															C17orf67
		HAS2															KLRC4
		MIA3															C20orf96
		LSM14B															KDELR3
		FUT9															ITM2B
		CABLES1															MFHAS1
		SAMD1															POLR2C
		STAB2															ZNF24
		CELSR2															LRRTM2
		HUWE1															ADORA2B
		DLEU7															TAL1
		CCL18															REEP3
		GAMT															TMTC4
		OSM															TMED10
		RHOG															GFRA2
		MS4A6A															NUP37
		ZBTB12															FGD4
		MAP7D2															TIFA
		TNFAIP2															SLC25A16
		PSMB9															CD320
		MDFIC															CDC42EP1
		SLC11A1															CASD1
		PGM5P2															GCH1
		G0S2															SAMD14
		IRF5															IRS2
		PTGDR															ZNF417
		HLA-DOA															CTSF
		FAM20C															IRAK1
		CTSB															MR1
		COL25A1															DPAGT1
		ASTN2															NBPF9
		HEY1															DAP
		FBXW5															TMEM91
		HBD															ARHGDIA
		CXXC4															AQP11
		MS4A1															ITGB3
		ZNF579															HOXC6
		ESRRA															KCTD3
		SIX1															MAN2B2
		CD1D															TAT
		DMXL2															PLEKHN1
		USP27X															ARHGEF1
		SPSB2															BCL2L1
		PCSK2															TRAPPC6A
		TLE4															TRIM6
		PCDHGB1															RPLP0P2
		MMP12															C3orf62
		TPD52															STARD8
		OLR1															SPINT1
		RAB39B															FAM102A
		TMEM129															TM4SF1
		RS1															RABL3
		ENTPD1															LMTK2
		PDPN															APOL2
		MMP9															SESTD1
		TTC22															NAB2
		RGS10															ABCC4
		CRAT															FDPS
		HSH2D															ST6GALNAC1
		CD19															EVI5
		ARHGAP15															OCIAD2
		RNF152															CCT4
		RASD1															TPST1
		SH3BGRL															ENSA
		RUNX3															IPO7
		B4GALNT4															PJA1
		MYBPC2															MAP3K6
		FGF9															TAC4
		TNMD															FAM3A
		ALG9															MMEL1
		GPR34															FBXW9
		ARRDC5															PRNP
		IPO4															MXD1
		FBXO2															DUSP19
		MICB															SLCO4C1
		IFI30
		GIMAP4
		CREB3L4
		C6orf52
		FSTL5
		LETM1
		OTUD5
		NR2F6
		AOAH
		PTPN1
		FLG
		PLCG2
		SUCNR1
		GNB4
		MSC
		CACNG4
		PAQR7
		TRAF3IP3
		ID2
		SIDT1
		IL6
		CETP
		TNFSF10
		C1QB
		IRF1
		TBC1D2B
		CST3
		P2RY14
		SLC1A5
		SAMD9
		CCL24
		SHB
		CD6
		ACP5
		DDIT4
		TNNT3
		LRRC20
		GJB1
		ITPA
		ACTB
		SLC35F3
		CD52
		LITAF
		HK3
		FAM89A
		CD44
		SEC14L1
		SH3KBP1
		TBX15
		B3GAT1
		POU2AF1
		KIR3DL2
		PCOLCE2
		TREM2
		WDR72
		NFKBIL1
		ZNF397
		PPP4R1
		SLC7A6
		CXCL13
		CST7
		NELL2
		FN3K
		FARP1
		WNK2
		MAPT
		CD226
		CORO1C
		MME
		CSF2RB
		TNFRSF9
		PYCR1
		ZNF28
		UMODL1
		ITK
		RGS18
		EPHB6
		POP7
		PARP2
		KCNQ2
		WNK3
		TIMP1
		IL15RA
		SDS

## Sheet: Intersection of the three modul
Intersection of the three modules	TCGA_Red	GSE72094_Blue	GSE41271_Brown
CD44	FCGR2B	ZNF708	MFSD3
KCNMA1	EPB41L2	IL32	ZNF708
CXCR4	VNN2	ST3GAL6	TLL2
KBTBD8	KBTBD8	KLK8	IL32
SOD2	DOCK10	RBM15B	ST3GAL6
TNS3	LYZ	MT1A	KRT1
LHFPL2	ICA1	TMCO1	PRKG2
PTPN22	SLA	UPP1	CHN2
SIGLEC8	IL10RA	AMN	MT1A
SLCO2B1	UBE2J1	GLRA3	GRIP1
AP1S2	RARRES1	GRIP1	RPRM
SPIRE2	TNFAIP3	HCG27	KCNE4
SERPINB9	SLC36A1	RPRM	FCGR2B
EVI2A	P2RY12	HOXC13	IL27RA
GIMAP1	TFEC	FCGR2B	BRDT
ST8SIA4	CTSC	KIAA1328	EPB41L2
SAMSN1	C1orf56	CBL	XCL1
PLCL2	TBC1D9	RLN1	TREH
CARD8	IFI16	EVPL	GNA12
ADAM19	RGL1	OTUD1	OR51E2
SLC9A9	IRF8	XCL1	STARD5
RCSD1	DTX3L	CYP2E1	ZNF551
PIK3AP1	FYN	ASB2	OGDHL
TM6SF1	SDCBP	IL12A	CD79B
CD53	JAK2	VNN2	VNN2
GNB4	TRIM22	GALC	KBTBD8
DOCK11	PLXNC1	KBTBD8	BTLA
TIAM1	FNBP1	RNF24	WNK4
BTK	DOCK2	BCL7C	DOCK10
TAGAP	SPIRE2	BTLA	GABRA3
IFI16	PARP14	UQCRB	KCNJ5
KLHL6	CARD8	DOC2A	CRYBB1
ATP8B4	TLR2	WNK4	ABCA1
SLA	BIN2	LNPEP	MCOLN2
CPVL	DOCK8	DOCK10	PCDHGA2
FYN	RGS1	USP18	S100A12
JAK2	PDE4B	CAND1	DLX6
CORO1C	GIMAP7	KCNJ5	PLP1
ARHGAP25	AXL	KCNJ11	TMED6
FAM78A	OVOL2	CRYBB1	LYZ
MSR1	PREX1	PRKACB	MBOAT1
CMKLR1	ATP6V1B2	CLCA4	CRB3
FLI1	MS4A7	HOOK3	SEC14L3
GNG2	P2RY13	ATAD3C	WAS
EPB41L3	GIMAP8	ABCA1	FBXO6
GIMAP6	IFIH1	MCOLN2	DDR1
MRC1	TDRD6	S100A12	SPI1
CD86	LAP3	ZNF248	CLEC5A
RGS18	ADAM19	RTN2	TTLL1
TNFAIP3	GPR65	TMED6	MAPK4
PTGER4	TNFAIP8	LYZ	PHACTR3
RGS1	FCGR3A	ZFYVE19	SLA
CR1	TDO2	ICA1	IL10RA
P2RY14	CLEC2D	WAS	KCTD1
GRIN3A	LACTB	FBXO6	NOTCH2
PTPRC	LCP2	DDR1	TMOD1
STK10	TM6SF1	SPI1	ANTXR2
OGFRL1	KCTD12	ZNF425	UBE2J1
FCGR2A	CD180	PRB2	EOMES
AXL	FAM78A	CRH	MCL1
F13A1	TPK1	CLEC5A	POPDC3
SAMHD1	GAB3	PDCD4	GBP5
MS4A4A	RAB30	MAPK4	RARRES1
CYSLTR1	CXorf21	FCGRT	ENTPD6
TLR7	PTPN22	ZFHX2	ASGR1
GIMAP4	PRKCH	MYSM1	STK35
CLEC7A	FCGR2A	CEACAM19	LIMD2
KCNA3	SYT11	SLA	SLC43A2
EVI2B	TNFRSF1B	ZNF350	BMP8A
TNFSF8	STK10	ZNF664	STAT1
CYBB	TIMD4	IL10RA	POMC
RASGRP3	EVI2B	TYK2	ATP2A3
PLA2G7	SAMHD1	KCTD1	CMTM3
CXorf21	CD163	NOTCH2	RAC2
PDE4B	RASSF2	ANTXR2	TNFAIP3
MAFB	WIPF1	THOC1	ECE1
PLEKHA2	MAN1A1	EOMES	ADAM7
CD209	SP100	ULK1	MARVELD3
LCP2	JAZF1	EXTL2	CD96
GAB3	CCND2	FCRL1	LY86
IL10RA	BMP2K	GBP5	CHRNA5
SLC1A3	MAFB	RARRES1	HLA-DRB6
CLEC2D	CD200R1	ENTPD6	AKR1C1
CD84	ATP10D	CFB	SHC4
LYZ	ARHGAP18	ASGR1	TP53INP1
RARRES1	PTPRC	MAFK	EPB41L4B
LCP1	P2RX7	STK35	LRP1
PRKCH	PLEK	SIPA1	ADAM8
MAF	HAVCR2	RBMS2	LTK
MPEG1	TNFSF8	RPL9	TREM1
FGD3	CPVL	GPR171	IFITM1
LAP3	PARP9	ABHD5	PC
IFIH1	SAMD9L	LIMD2	FKBP10
PREX1	NFATC2	DCP2	GALM
IGSF6	GPNMB	EIF2AK2	MT1L
WIPF1	IFIT2	SLC43A2	TMPRSS4
PDCD1LG2	IFNGR1	STATH	S100A3
SUCNR1	LXN	STAT1	TBX1
TLR2	ARHGAP25	IL18BP	IFITM2
P2RX7	PPP1R16B	POMC	PSTPIP1
IL18R1	PIK3CG	HSPA1L	RNF125
VNN2	MNDA	HCFC2	LPIN2
TIMD4	MSR1	ZNF700	PPFIA3
BMP2K	KLHL6	MANBA	FHIT
HAVCR2	ARL6IP5	C9orf16	TCTA
LACTB	F13A1	CASP4	CTSC
ITGAL	DAPP1	SLC39A10	SMOC1
CYP1B1	ST8SIA4	TREML1	RELB
FNBP1	CD80	RAC2	PLAG1
IQGAP2	ARHGEF6	TNFAIP3	ENTPD3
FGL2	MS4A4A	SLC36A1	APOBEC2
MDFIC	IFIT3	MARVELD3	CD200
DOCK2	MFSD1	CD96	KIF21B
GIMAP8	VIM	LY86	PTPN14
TRIM22	TAGAP	CHRNA5	PRKX
PLEK	TGM2	HLA-DRB6	TRIM46
NLRP3	IL7	FUT7	TLR6
RNASE6	PTPRJ	RXRA	IGFBP2
RAB8B	TLR7	ATP1B3	TNFRSF17
GPNMB	FMNL3	EPB41L4B	PROCR
TGM2	DPYD	COPG2	TMEM63C
GPR137B	TMEM106A	P2RY12	TNFSF12
FCGR2B	CTSS	KCTD18	GYPC
ARHGAP30	MYO5A	NLRP1	RPAP1
LRRC8C	C2orf15	SIRT4	THPO
DOCK8	GPR82	SUSD1	ABCB4
FAS	FAS	KLK7	TNFRSF14
CYSLTR2	BIRC3	DGKQ	CAPZA3
CLEC2B	NPL	PPP1R12A	TSPAN32
C3AR1	MITF	MORC2	PIGZ
NCF2	KCNA3	TREM1	SP8
STAT4	PXK	EPHA7	EML4
LPXN	CYBB	IFITM1	PRMT8
PLXNC1	CD209	ZCCHC12	FAM24B
SNX10	ENPP2	PC	ANK1
LITAF	PIK3AP1	GALM	CMTM4
MNDA	STAT4	MT1L	TFCP2L1
MS4A6A	ABCA6	RRAGD	CEP70
IFIT2	SYK	FABP5	CXCL9
SH3BGRL	LILRA4	PCGF5	HLA-F
CTSS	RCBTB2	ATP10A	LGALS2
TBC1D2B	FGL2	S100A3	MYO5B
TLR8	SRGN	F11R	CACNA2D1
SAMD9L	PTGER4	TYSND1	NFKBIE
CD226	PDCD1LG2	PSTPIP1	SCAMP3
ARSB	IL10	SIRT1	IFI16
MYO5A	RAB8B	RNF125	UAP1L1
LIPA	INPP5D	ATP6V0D1	FCRL2
IL15	KIAA1549	PPFIA3	ERBB3
VSIG4	AMPD3	TFEC	RGL1
OVOL2	SOD2	CTSC	FAM81A
SRGN	HSD11B1	SIRT2	IRF8
MFSD1	CYSLTR1	RELB	PEMT
ITGA4	ABCA9	COTL1	SUSD3
GPR82	CLEC4C	MIDN	SCRN1
P2RY13	C3AR1	ZNF616	HS3ST2
CD163	ATP8B4	MMP15	FLT3LG
GIMAP2	ARSB	QKI	TTC12
TBC1D4	SLC9A9	KIF21B	SGCG
GPR65	SIGLEC8	PTPN14	ZAP70
DAB2	SPN	VASP	ENO3
IL2RA	MAF	PRKX	MSI2
CCR1	LPXN	BSCL2	FYN
SDCBP	NLRP3	TRIM46	HLA-DPB2
CD80	DAB2	TLR6	GBP2
RASGRP1	KCNMA1	MEPE	TSPAN33
PIK3CG	PRDM1	TMEM63C	MAGEE2
FMNL3	LHFPL2	TNFSF12	SLC8A2
GIMAP7	RASGRP3	GYPC	TOB1
SYK	IGSF6	RPAP1	FGL1
TNFSF13B	CYP1B1	SP110	CATSPER1
DOCK10	SLC8A1	PCK1	SLC25A27
GPR34	LCP1	IQSEC1	FXYD4
RASSF2	COLEC12	BNIP2	MAPK8IP1
TPK1	FGD3	C14orf39	ZYX
TNFAIP8	BTK	SNAPC3	ALKBH4
TNFRSF1B	SERPINB9	PML	SDCBP
KIAA1549	CCR1	ABCB4	JAKMIP2
ETS1	GNG2	P2RX4	RBM38
INPP5D	PLCL2	RNF170	LILRA5
IL7R	CLEC4E	FBP1	PLA2G4C
TLR4	CHRNA6	TNFRSF14	GFPT2
MS4A7	TLR1	C1orf56	PILRA
ARHGEF6	CLEC2B	TSPAN32	NFATC4
GLIPR1	CLEC4A	FRS3	CC2D1A
PPP1R16B	RGS13	PIGZ	DEFB126
LAPTM5	CCR2	VPS13C	CCL11
CCND2	LIPA	ATP11B	NAPSB
CLEC4G	MRC1	RHBDF1	RLN3
CLEC4A	RASGRP1	PRMT8	LTB
IRF8	RNASE6	IFIT5	APOBEC3C
TDO2	SLC1A3	NRBP2	NRP1
SAMD9	IL18R1	RRN3	FLT3
HSD11B1	CYSLTR2	TBC1D9	SNX22
APBB1IP	GIMAP2	CMTM4	TXNL4B
NPL	CLEC7A	HSPA5	LAIR1
AOAH	TBC1D4	TRRAP	GCHFR
RASA3	CTSO	HIGD1A	JAK2
PXK	GPR141	TMCO6	TNFRSF13B
CD274	SAMSN1	CXCL9	IFNG
IL7	CCL13	HLA-F	PAK4
CSF2RB	LAPTM5	NEK8	GRN
HCLS1	OGFRL1	LGALS2	EBI3
BIRC3	GPR137B	PCDHGA10	BTN3A2
CTSC	FLI1	NFKBIE	LHFPL5
	VSIG4	TSEN2	PTCRA
	CLEC4G	IFI16	SLC31A2
	IL7R	UAP1L1	GAB2
	RASGEF1B	ALKBH8	WDR3
	PLSCR1	IRF8	L3MBTL4
	TLR4	PEMT	TRIM22
	ITGAL	SOX2	TMEM26
	TIAM1	SUSD3	DHCR7
	HCLS1	SCRN1	USP21
	XAF1	SNRPE	HDAC11
	XCR1	TBX18	STX11
	SLCO2B1	ATF7IP	ANKRD22
	PLEKHA2	CUEDC1	FLAD1
	IFNAR2	HS3ST2	KLC2
	ETS1	DTX3L	CRYZ
	CREBL2	FLT3LG	GRHL1
	GIMAP6	TRIM55	ALDH3A2
	OSTM1	FKBP8	PLA1A
	TRIM14	RHOF	CD33
	APOL6	ZAP70	SCML4
	PLA2G7	TMEM14A	ARRDC1
	EVI2A	RUSC1	SH3BGR
	OSTF1	FYN	CCDC24
	MEF2C	TK2	IFI44
	IQGAP2	HLA-DPB2	CAMK1G
	SIGLEC6	GBP2	LOXL3
	CD53	ANXA1	PNMT
	CD84	TCP11L2	TPP1
	MTA3	LRRC56	GSC
	TGFBI	TOR2A	CCL8
	GRIN3A	TSPAN33	PLXNC1
	APBB1IP	SLC8A2	RETN
	MPEG1	ENTPD8	PCDHGB5
	LRRC8C	CARD6	JUP
	CMKLR1	LTF	CDKN1A
	NCF2	SPRR2E	TBC1D19
	ITGA4	RAB4A	RAB40B
	AP1S2	SDC3	MAL
	CD274	CATSPER1	ANGPTL4
	RCSD1	ARHGAP22	ZNF517
	ARHGAP30	ATP2A2	KLRB1
	CLEC4D	ARHGEF16	FNBP1
	DOCK11	ZYX	EMILIN2
	CR1	GAL3ST4	FABP3
	ANKRD44	CST6	FGD2
	GIMAP1	SDCBP	MVK
	IL2RA	BLZF1	DOCK2
	EPB41L3	JAKMIP2	GFRA1
	TLR8	LGR4	SPIRE2
	SNX10	AKAP9	IL1RN
	IL15	LILRA5	SYT7
	TNFSF13B	PLA2G4C	CSF3R
	GPR155	SPPL2B	GLIS2
	TNS3	LYPD5	LTBP1
	GLIPR1	SLC19A2	TIPARP
	CD86	PILRA	MAGEE1
	LY75	DEFB126	CARD8
	RASA3	IL12RB2	TLR2
	CXCR4	NAPSB	HAMP
	HRH2	TAF4B	HES5
	MS4A6A	LTB	OSBP2
	MDFIC	SLC6A8	CD69
	SH3BGRL	USP45	OTUB2
	GPR34	APOBEC3C	MGAT4A
	GIMAP4	TBX6	CD74
	AOAH	FLT3	MTNR1A
	SUCNR1	DDX58	DPYS
	GNB4	CENPB	SPINK6
	TBC1D2B	LAIR1	SLC2A13
	P2RY14	NFAM1	CCHCR1
	SAMD9	PPM1L	CD244
	LITAF	TDRD1	SLC15A3
	CD44	C1orf109	STAC3
	CERKL	SLC37A4	DDN
	SGTB	KLHL25	KRT40
	CD226	TFAP2E	DOCK8
	CORO1C	TMEM86B	RGS1
	CSF2RB	RPIA	AACS
	RGS18	GCHFR	HSD11B2
	PRNP	LY6E	DNER
		ECH1	UBD
		TMEM99	PDE4B
		JAK2	GNGT1
		TNFRSF13B	IGLL1
		SIT1	UTS2
		IFNG	DPM2
		PAK4	DPEP3
		CD300E	GIMAP7
		NHLRC2	RGS19
		N4BP2	GNGT2
		PVR	LAG3
		GRN	AXL
		EBI3	ZNF205
		BTN3A2	PSAP
		PTCRA	POLR3H
		SLC31A2	OVOL2
		SLC25A24	PREX1
		GNA11	KIF25
		BTAF1	CRYM
		TNKS1BP1	TMEM17
		C3	TMEM30B
		TRIM22	N4BP3
		USP34	AP3B2
		TAF1C	GREB1
		RHOH	DACH2
		USF1	GRK6
		FAM3B	RAI1
		SH3TC1	MDM1
		HDAC11	OXSM
		STX11	MS4A7
		ZNF713	HTRA4
		ANKRD22	ABCA5
		ACTA1	PARP4
		POLG2	ATF5
		ADNP	P2RY13
		JDP2	IFT81
		DHRS2	NLGN4X
		BPNT1	SERPING1
		SERTAD4	CMTM8
		HOXB13	POU2F2
		CACNA1H	FGF19
		HPX	LILRB5
		GRHL1	GIMAP8
		B3GNT6	AQP3
		PLA1A	CCL7
		CD33	IL22RA2
		ZNF266	P2RY8
		GBP6	ICOS
		GABRG2	LRRTM1
		SLC25A42	HLA-B
		SCML4	INTU
		SH3BGR	IFIH1
		CCDC24	ST3GAL1
		IFI44	SLN
		CAMK1G	FBXL16
		PNMT	GATM
		TPP1	LAP3
		IVL	TSTA3
		MBD6	ADAM19
		CCT5	OBSL1
		BBX	KCTD5
		CCDC47	GPR65
		CCL8	AP4M1
		PLXNC1	PCSK1N
		BAG1	AQP7P1
		RETN	HOOK1
		PCDHGB5	VMO1
		ULK3	NPTXR
		JUP	TMED3
		UAP1	GZMH
		TBC1D19	CA3
		ATP13A1	RGS9BP
		RAB40B	TNFAIP8
		MCOLN3	CD3D
		KLRB1	TRIM9
		GOLGB1	MAP3K8
		FNBP1	LGR6
		EMILIN2	GPT2
		CAPN12	TIMP2
		FABP3	ST14
		LILRB1	HCP5
		ACTN4	GPR37L1
		FGD2	BAIAP2
		DOCK2	ITGAM
		TBC1D8	TDO2
		SPIRE2	MMP7
		IL1RAPL1	CLEC2D
		IL1RN	CPNE4
		PARP14	CNDP1
		OSBPL2	MAST3
		VAT1	GABRQ
		CSF3R	OASL
		ADCY6	LACTB
		DCUN1D3	TULP3
		CD300LB	HCST
		ZNF613	GPRC5C
		HRAS	TMEM107
		IL24	ARC
		BCL9	ZFP3
		SLC31A1	CLDN7
		RASSF3	LCP2
		TIPARP	DBF4
		CARD8	NBEAL1
		SPHK2	APOC1
		RLN2	TM6SF1
		TLR2	PHOX2B
		CLCN3	SLFN11
		HAMP	VPREB3
		BIN2	CYBA
		HES5	PELI3
		LRP5	EMP3
		NT5DC3	CD180
		CD69	GALNT2
		MGAT4A	DTX4
		SLCO5A1	HLA-DRB1
		CD74	FAM78A
		STOM	TPK1
		PCDH8	SYTL3
		CD244	EPHB1
		SLC15A3	NOTUM
		STAC3	SLC2A3
		KRT40	ABHD1
		DOCK8	SYPL2
		PLCB1	GLUL
		BLVRA	PLAT
		RGS1	OPTN
		VWA2	S100A4
		HSD11B2	HYAL3
		SIGLEC11	ZNF195
		UBD	TPPP
		PTOV1	UBASH3A
		PDE4B	CUL7
		PBX4	IL21R
		KCNQ3	PITPNM2
		PRLR	BIRC7
		RNF148	KCNAB2
		SULT2B1	ITPR2
		GNGT1	PDE3A
		LRRCC1	MGAT5
		UTS2	RAB20
		KRTAP5-1	NNMT
		DPEP3	ITGAD
		ZNF30	TBXAS1
		PIK3CA	METRNL
		GIMAP7	SIGLEC7
		RGS19	CFDP1
		GNGT2	ZNF256
		UGCG	RIPK2
		LAG3	GAB3
		PEPD	ALDH4A1
		AXL	RAB32
		DDO	FTL
		ZNF205	KCNJ8
		PSAP	HLA-DMA
		OVOL2	RAB30
		SLC22A5	SSNA1
		PREX1	CLEC12A
		CYP2W1	CXorf21
		MPP3	XPR1
		STAB1	PIP5K1A
		SCAMP2	PTPN22
		TCF7L2	WT1
		MAP7	NENF
		ICAM2	IL17RE
		TMEM17	DBH
		SCCPDH	CD40LG
		ALDH8A1	PRKCH
		DCUN1D5	GPX1
		KCNAB3	TRAFD1
		RHOT2	SLC4A3
		TRIM11	TUBB2A
		CBLB	AGRP
		GRK6	IGSF8
		ATP6V1B2	FCGR2A
		RAI1	ENAM
		MDM1	SYT11
		ARHGEF10L	STAC
		ZNF85	NUDT17
		PPP1R13B	GSTP1
		OXSM	TNFRSF1B
		MS4A7	CA6
		HTRA4	RNASE3
		CLOCK	KYNU
		ATF5	TMPRSS6
		P2RY13	GPR27
		IFT81	TSHR
		CMTM8	LYSMD1
		AVPI1	SCARF1
		ARPC1B	FZD9
		ZBTB37	CCL19
		DPPA5	TRIM45
		LILRB5	FSIP2
		GIMAP8	STIP1
		LAMP2	CTLA4
		IL22RA2	STK10
		ICOS	GRIK2
		HLA-B	NFATC1
		IFIH1	FCER2
		ZNF607	FCRL3
		EHD4	ATP7B
		FBXL16	DYSF
		LAP3	NPC1
		SLC5A12	INHA
		CCDC121	CAB39L
		UQCRC2	RAB25
		ZDHHC8	GABRB3
		ADAM19	CHI3L2
		INSR	TMEM154
		OBSL1	TIMD4
		GPR65	CCL21
		LRRC3	SDSL
		GPAM	EVI2B
		PCSK1N	GLS2
		AQP7P1	SAMHD1
		MTMR12	CFD
		HOOK1	PPARGC1A
		VMO1	SPR
		TMEM63A	PLEKHA6
		ZNF615	AQP9
		INSIG1	ARID5A
		RFK	FZD5
		CUBN	ZNF80
		TMED3	RFNG
		KEL	CD163
		NHLH2	ZNF630
		ZNF12	GPC1
		RAD1	ANPEP
		SLC6A11	RASSF2
		GZMH	BCL3
		FAAH	MAP1LC3A
		NAGA	RENBP
		PLCH2	DOCK5
		ARL3	WIPF1
		NDUFA11	LRRC45
		RGL2	SORBS3
		TIA1	ELF4
		TNFAIP8	LILRB2
		PDE6B	DNASE2B
		CLCNKA	STAMBPL1
		FRG1	CD48
		MYC	GZMA
		DHTKD1	MS4A6E
		CD3D	MRPS18A
		MAP3K8	SLC25A45
		PTP4A1	CRYBB2
		SOX15	GDPD2
		GPT2	TMEM68
		FCGR3A	PCDH10
		GAS5	SAMD12
		CNKSR1	CD28
		HCP5	ZNF605
		RNF175	SLC14A2
		TRAF7	OR5P2
		MAMDC4	MSI1
		GPR37L1	OLIG1
		PHKG2	CASP9
		AKAP5	CCND2
		ZNF267	PSMB10
		BAIAP2	RNF32
		ITGAM	BMP2K
		ATG10	MAFB
		RAP1B	SOX13
		TDO2	SIRPG
		MMP7	THEM4
		CLEC2D	MTHFD2L
		BHLHB9	KCNJ13
		CPNE4	TTC8
		NDUFS1	PTPRC
		CSPP1	IRF6
		NMI	EEF1A2
		IARS2	STAP2
		NOS1AP	CD300LF
		MAST3	CD7
		PIK3C3	P2RX7
		GJB7	PLEK
		OASL	LBX2
		LACTB	MMP25
		TULP3	GLRX
		CECR2	TSC22D2
		HCST	FGF12
		RPLP1	RAB26
		GPRC5C	HAVCR2
		RCN2	P2RY10
		TMEM107	IRAK2
		MAGI1	TIFAB
		CLDN7	TNFSF8
		LCP2	GYG2
		GNL3L	HLA-DQB1
		PRDM8	GPR18
		ZNF337	CPVL
		BLNK	UBE2L6
		APOC1	PNRC1
		EFNB3	KCNH2
		TM6SF1	EGFL7
		PRKCQ	PRAM1
		SH3BP4	TCEA2
		SP1	SLC29A4
		ATP11C	EDA2R
		KCTD12	SAMD9L
		SLFN11	DVL1
		CYBA	KCNJ2
		ISYNA1	GAS2L1
		SH3BP2	SLAMF1
		EMP3	HHAT
		MIF4GD	UPK2
		SNX2	BBC3
		PARP11	IL4I1
		HLA-DRB1	PLAUR
		FAM78A	POLD2
		TPK1	SPOCK3
		FKBP5	PSME2
		MPND	ADPRHL1
		AMDHD2	KRT23
		NOTUM	CMTM2
		AEBP2	GPNMB
		ASB4	IFIT2
		GLUL	ZNF691
		CGRRF1	CHST10
		PLXND1	IFNGR1
		PHLDA3	DGKA
		DNAJC10	KMO
		HORMAD1	OAF
		EGFL6	CLUL1
		OPTN	TPTE2
		C3orf38	NCF4
		S100A4	DUSP2
		DEFB114	BATF
		SBK1	ZNF677
		PPP1R3F	ANKRD13B
		ZNF195	RAB37
		INE1	SNTA1
		UBASH3A	GBP4
		CUL7	ASB16
		IL21R	CTSW
		IL4R	WNT2
		BIRC7	GBP1
		KCNAB2	PROK2
		ITPR2	ZNF418
		MGAT5	OSBPL1A
		RAB20	APOBEC3F
		POLR2A	GALNT7
		ASB9	ARHGAP25
		NAGS	TMEM71
		STARD4	LDHC
		ITGAD	TXK
		TBXAS1	DUSP5
		METRNL	APOC2
		SIGLEC7	C15orf48
		CFDP1	PPP1R16B
		FZD6	PIK3CG
		ZNF256	RANBP3L
		GAB3	PDE7A
		LILRA6	CLIC2
		ALDH4A1	MNDA
		RAB32	CD68
		ZNF547	PTGES
		FTL	NKG7
		HLA-DMA	GPAA1
		CLEC12A	GPR84
		CXorf21	TRIM69
		OR13A1	ZBED3
		LRP6	MSR1
		PTPN22	LAIR2
		DPM3	GUCY2D
		ACVR1B	DOK3
		RHOBTB1	HLA-DPA1
		NENF	TRAP1
		PRH2	FCGR1A
		IL17RE	NTN4
		ARSG	KLHL6
		ZNF281	BASP1
		CD40LG	CHRNA9
		SLC12A2	MT2A
		ZNF383	FIGN
		PLD4	KLRC3
		PRKCH	NAALADL1
		GPX1	F13A1
		XRCC5	GRM4
		SLC4A3	TMEM9
		AGRP	ERN1
		IGSF8	RIBC1
		FCGR2A	KCNC3
		ZNF154	BFSP1
		STAC	ANKRD9
		NUDT17	TM4SF19
		DOCK4	SPP1
		BCAP31	UGT8
		PCCB	CAMK1
		GSTP1	MAP4K1
		TNFRSF1B	GFI1
		NSUN6	CD2
		TMPRSS6	ST8SIA4
		CITED1	FGR
		RBP4	ZNF236
		CD82	KIAA0895
		SMARCD2	CTNNBIP1
		ZNF276	CD247
		FZD9	PPARG
		CCL19	TOMM40L
		TRIM45	ADAM28
		SLC6A3	B4GALNT3
		FSIP2	STYK1
		LCOR	CD80
		DIRAS2	ARHGEF6
		KLRK1	TUBB6
		CTLA4	MEI1
		PHC3	LTA
		HIVEP1	MEOX2
		STK10	MLF2
		GRIK2	CPNE5
		POLD4	KHDRBS3
		NFATC1	MS4A4A
		FCER2	SLITRK6
		FCRL3	FBXO46
		PHF23	TRAT1
		PELP1	GSTK1
		DYSF	CCDC68
		NPC1	PDCD1
		HSF2	GPR132
		GLCCI1	DNAJC12
		RAB25	ZNHIT2
		CYP51A1	CLGN
		PLEKHA3	IL18RAP
		LRAT	CSTL1
		HS3ST3B1	VPS37D
		TMEM154	MFSD1
		TIMD4	FMO4
		MST1	STAT5A
		CCL21	KIAA1522
		SLC16A10	DSCAM
		PFN4	TAGAP
		EVI2B	CDH4
		ZNF419	AGTPBP1
		CLDN3	FCHO1
		SARS2	LST1
		SMARCA1	NUMBL
		MYO9B	CLK1
		LSM10	PTPRF
		SAMHD1	FCRL5
		EGR2	IL3RA
		PPARGC1A	RGL3
		SPR	GNLY
		PLEKHF2	TGM2
		DMAP1	ZBED2
		AQP9	HLA-G
		ARID5A	IL7
		ZNF80	PCBP4
		RFNG	MID2
		CD163	NMT2
		ZNF630	TLR7
		NFKB2	P2RX1
		CSTA	WARS2
		SYT17	STXBP4
		ANPEP	TMIE
		RASSF2	TRMT12
		D2HGDH	TSPAN11
		RENBP	STK32C
		DLG4	TMEM54
		ENC1	FMNL3
		NDP	IL1B
		HSF4	ADH5
		DOCK5	PLEKHF1
		WIPF1	CXCR3
		ARHGAP5	ZDHHC16
		ELF4	PRRG2
		LILRB2	DPEP1
		FADS3	MEFV
		ARMC7	RASSF5
		REEP6	TRUB2
		SLC25A35	WIPF3
		DNASE2B	FGFR3
		STAMBPL1	GZMM
		CD48	FKBP11
		DMRTA1	TMEM106A
		GZMA	SLC9A3
		MS4A6E	CTSS
		PLCXD2	ZFP36L2
		TFEB	ISG20
		MIPOL1	MYO5A
		CRYBB2	PPM1K
		LCN12	SMUG1
		SCNN1D	PCDH7
		UNC5D	CHRM1
		USPL1	OCLN
		PCDHGB6	SLC25A10
		PDK2	LYN
		TNIK	TAF6
		RB1	GPR82
		PRKD3	ZBTB7B
		PRKAB2	SH2D1B
		SAMD12	FAS
		CD28	IGSF9
		MAN1A1	PEX11A
		TRIM38	CDC42BPG
		SP100	BIRC3
		ZNF605	PAX8
		GUK1	CD160
		GIPR	DLK1
		MSI1	GPR39
		TBC1D8B	HMGA2
		JAZF1	HPCAL4
		EMX2	C16orf54
		MYO18A	CCR6
		CCND2	RGS16
		PSMB10	MAP3K1
		SLCO1B1	KLRG1
		RNF32	MPST
		BMP2K	ASPHD2
		EDEM1	NPL
		MAFB	SGK2
		CD200R1	NR0B1
		SIRPG	CPSF6
		ATP10D	PPM1M
		MT1JP	CIITA
		MTHFD2L	SERGEF
		TOR1AIP2	TMC8
		TTC8	CAPN14
		SOX4	CLCN2
		ARHGAP18	KCNA3
		C12orf54	B4GALT2
		PTPRC	PCDH9
		CNIH4	VAV1
		IRF6	TM7SF2
		TBC1D10A	SLC7A4
		SLC28A3	SAMD3
		EML3	TAP2
		CD300LF	PXK
		CDK5R2	KRT8
		CD7	CYBB
		P2RX7	ETV4
		PLEK	TAPBPL
		GGA2	TMEM53
		MMP25	NMNAT2
		GLRX	PRUNE2
		TSC22D2	NINJ1
		RAB26	ACVR2A
		HAVCR2	HAPLN3
		P2RY10	RPS27L
		SLC7A10	TUFT1
		IRAK2	LAT2
		TIFAB	HOXD10
		TNFSF8	HDHD3
		ETV7	FUT1
		GYG2	CSF2RA
		ZXDB	ASPSCR1
		HLA-DQB1	MRPS21
		GPR18	ECHS1
		CPVL	CD209
		SMCHD1	CD8A
		SMPDL3A	RAB33A
		CHKA	PHYHIP
		ZDHHC13	FXYD5
		UBE2L6	KLRG2
		PARP9	ZNF629
		HEXA	STEAP2
		C7orf31	IRF2BP1
		PNRC1	OAS3
		ZNF77	MAST1
		STON2	DKK4
		C21orf91	PIK3AP1
		KCNH2	PCDH19
		KCNS1	STAT4
		CHD1	UCKL1
		NIPSNAP3A	GRHL2
		PRAM1	OAS2
		TCEA2	SIGLEC9
		SLC29A4	FBXL20
		SAMD9L	JSRP1
		DVL1	OSBPL3
		SH3RF2	EPB41L1
		KCNJ2	GRIK5
		NFATC2	PVT1
		SLAMF1	DENND2D
		MAPK8IP3	ZNF7
		NME7	OSCAR
		MAPRE2	RHBDL1
		HRK	PASK
		TLE6	ZNF696
		BBC3	ZNF232
		IL4I1	CLYBL
		KIFC3	CTNND2
		CEACAM4	NEO1
		GAS2L3	ACVRL1
		CASQ1	SLC26A4
		SLFN5	ST6GAL1
		PLCB3	RHCE
		CD58	ABCB1
		HSPA1A	ADA
		PSME2	IFI27
		ADPRHL1	IGSF3
		EHD1	WDR24
		NAGPA	ATP6V1B1
		ADORA2A	SCIN
		LRCH4	SYK
		GPNMB	KSR1
		IFIT2	GCAT
		HOMER1	SELPLG
		SYPL1	ELMO3
		SLC22A18	TTYH2
		CHST10	STX2
		TASP1	CSF1R
		CNGB1	SNPH
		ZNF354A	SLC17A7
		SLC37A1	PACSIN1
		DGKA	TBKBP1
		KMO	SOX11
		CMTM6	ADRA1D
		ZNF721	RND2
		ZMYND15	TMIGD2
		PFKM	KDR
		MBTPS2	FGL2
		TMOD3	SRGN
		SNX16	C1orf74
		GUCY1B2	EFNA1
		NCF4	CDH26
		DUSP2	CXCR6
		IL26	ABHD6
		TTC7A	ARMC5
		BATF	ZC3HAV1L
		MBNL3	GPT
		IKBKG	FRMD4B
		ZNF677	RARRES2
		BRI3	CABLES2
		MBP	SLC37A2
		RAB37	ZMYM1
		EAF1	PSD
		SNTA1	PTGER4
		GBP4	LRBA
		HCN3	ICAM3
		SPRED2	ARHGEF18
		SLC16A9	EPHB3
		CTSW	ITGAX
		FANCF	CAMP
		AXIN1	ABO
		GBP1	TMEM38A
		PROK2	RTKN
		OVCH1	PDCD1LG2
		APOBEC3F	LAX1
		GALNT7	ZBP1
		GNRH1	JPH3
		ARHGAP25	C1orf162
		EGFR	RBM11
		TMEM71	ACRBP
		TXK	RAB8B
		APOC2	TFPI
		G6PC3	SPIB
		C15orf48	RSPO3
		FES	INPP5D
		PPP1R16B	PRPH
		PIK3CG	KIAA1549
		SPRR2D	SMG5
		OAT	C3orf18
		SLC23A3	PTGS1
		PQBP1	TRIM21
		UNC93A	SFXN3
		IFT88	GMFG
		PDE7A	PADI4
		ARSH	SLC7A2
		CACNB3	RIPK4
		CLIC2	CHRD
		PIK3C2A	RIMS2
		KLK5	C1orf127
		LRRC2	SOD2
		ZNF614	ZNF165
		MNDA	HSD11B1
		CD68	SLC29A3
		UMOD	ZDHHC9
		HS6ST1	VAX2
		NKG7	CYSLTR1
		CTSD	DLG3
		FOXC2	GREM2
		GPR84	BRSK2
		CCR4	SAMD13
		ACP6	MGAT1
		TRIM69	SYNGR4
		PLXNB1	CFHR3
		RASGEF1C	PIK3CD
		MSR1	UCP2
		LAIR2	MYT1
		GUCY2D	HPD
		DOK3	PDLIM2
		HLA-DPA1	FRMD3
		FNBP4	LBH
		TRAP1	BAIAP3
		FCGR1A	DPP10
		BCKDHA	LPIN1
		PADI2	GOLT1A
		KLHL6	SNX8
		ZNF10	MERTK
		KLRC3	MYO1F
		PEX1	C1QL2
		NAALADL1	GPR158
		ARL6IP5	SCNN1G
		F13A1	OTUD3
		GRM4	CPS1
		CDKN1B	GMIP
		POGZ	PRRT3
		TMEM9	MPP2
		CCDC6	KLRF1
		GOLGA4	CD72
		ZDHHC1	NCR3
		KCNC3	PFKFB2
		CAPZA2	ST8SIA1
		BFSP1	CYHR1
		ANKRD9	BNIP3
		ITGAE	IL2RB
		TMEM186	ZNF671
		SFMBT2	PLXNA2
		TM4SF19	HCK
		PF4V1	PAG1
		KRT10	RAPGEFL1
		MYEF2	C3AR1
		RDH10	DLX3
		DAPP1	ATP8B4
		VPS18	PCDHB13
		CAMK1	ATP6V0C
		MAP4K1	ARSB
		GFI1	ALK
		MCF2L	ITGB7
		CPLX1	GALNT5
		CD2	SURF2
		NT5C	BARX1
		KCNQ4	SH3BGRL3
		ST8SIA4	BHMT
		MYCN	SLC9A9
		FGR	ASH1L
		MYO7A	MATK
		MAP4K3	OVOL1
		PARP8	DISP2
		TRIM52	COL24A1
		HERC3	TMEM25
		KIAA0895	ZNF300
		BDKRB1	SIGLEC8
		DNAJB2	IFI35
		OTX1	NTHL1
		GHRL	TMEM119
		CD247	DLGAP1
		PPARG	RSAD2
		ADAM28	FLNB
		B4GALNT3	ENTPD2
		CD80	CD38
		ARHGEF6	NAV3
		NIPA1	BTN2A2
		SPRR2F	MAF
		ARHGEF5	ACMSD
		PERP	LPXN
		WDR6	ELL3
		LTA	OLFML3
		FRMD4A	PACSIN3
		AMACR	CD14
		TEAD2	BLK
		KHDRBS3	ATP6V0D2
		PDCL	SERPINE1
		MS4A4A	ZNF215
		MAPKAPK3	PSD3
		RAB12	TKTL1
		NEB	HAL
		ETV3	NLRP3
		VIPR2	PTPN7
		FBXO46	MARVELD2
		TRAT1	ZNF572
		GSTK1	KLK14
		PYGB	CD79A
		IFIT3	DAB2
		PDCD1	CYP27B1
		GPR132	CD3E
		ZBTB41	TMPRSS13
		LMO1	AIF1
		MX2	C1R
		EPN3	GPR174
		PHKA2	GRB7
		IL18RAP	RPH3AL
		CSTL1	NANOS3
		VPS37D	PAEP
		FAM111A	WDR17
		ZNF121	KLRD1
		MFSD1	NCKIPSD
		SEMA6C	SIX2
		BCOR	RBP5
		VIM	FBXL2
		OXR1	TBC1D10C
		STAT5A	SPOCK2
		PNMA5	SH2D1A
		KIAA1522	GPSM3
		ZMPSTE24	CAMTA2
		TAGAP	WDR31
		SCNN1A	NT5M
		AGTPBP1	PLA2G2A
		GCNT1	ZNF101
		ANXA2	FMNL1
		CLDN9	KCNMA1
		FRRS1	ARHGAP9
		LST1	DENND1C
		PTPRF	OAS1
		IL3RA	TRIM47
		RGL3	KIRREL2
		GNLY	PRDM1
		PIWIL1	OVCH2
		TGM2	LHFPL2
		PRDX5	PODXL2
		ZBED2	RASGRP3
		DECR2	DPEP2
		MIB1	FGA
		SNX13	AMPH
		HLA-G	IGSF6
		KLHDC7B	ITGB2
		IL18	CDH16
		IL7	SNAI3
		NOXA1	TNC
		NMT2	GPR3
		PTPRJ	CASP5
		SIGLEC12	ADCY3
		TLN1	CYP1B1
		TLR7	CDK2AP2
		WARS2	RAB15
		STXBP4	LCP1
		TMIE	FGD3
		PPIB	CD22
		TMEM54	PARVG
		LAD1	BTK
		FMNL3	SLC16A6
		IL1B	SERPINB9
		SLCO3A1	CCR1
		FOXA1	ATP11A
		PLEKHF1	SELE
		DPYD	SLC40A1
		ELOF1	RASL10B
		CXCR3	FGD1
		CLEC9A	C1orf54
		AGR2	DHRSX
		AGRN	DERL3
		ELF1	BATF2
		MBTD1	MLKL
		PRRG2	ALDH1A3
		PTPN6	BCL2
		MEFV	PRF1
		RASSF5	GNG2
		RPS6KL1	U2AF1L4
		DYRK1B	GLI1
		WIPF3	CA8
		GZMM	FCRL4
		C1QBP	TTC6
		CUL5	TTLL7
		CTSS	KLF7
		ZFP36L2	PIM3
		B3GNT7	SLC4A7
		BCL10	WNT4
		MYO5A	ABLIM2
		RPL36	C1QA
		PPM1K	ETNK2
		IRF3	PLCL2
		LYN	SLC25A18
		C2orf15	SULT2A1
		VTN	ESR1
		SYNPR	DMGDH
		MAP3K5	SIRPB1
		GPR82	GOT1
		SH2D1B	LGALS1
		ZNFX1	MAN2B1
		FAS	MAP3K9
		SRP9	KLF12
		IGSF9	PVALB
		PEX11A	CXCL11
		GPS2	CYP26B1
		TBL3	GZMK
		SEMA4D	TOMM34
		BIRC3	RTN1
		CD160	BANK1
		LLGL2	CLEC2B
		TGFB1	MMP19
		DLK1	PSMB8
		RHOD	MESP1
		FAM102B	SV2B
		PRKD2	MCOLN1
		PLS1	DUSP4
		C16orf54	TMC4
		CCR6	SLC2A6
		ZNF426	IRF4
		CASK	CLEC4A
		TAOK1	SLAMF7
		PHF10	KIAA0753
		EPS8L2	PTPRO
		GABRG3	NOL3
		MAP3K1	ALOX5AP
		KLRG1	CSF1
		ZNF134	RHBDF2
		MPST	FASTK
		LTB4R	PTAFR
		SPRY3	NRP2
		ASPHD2	GJA5
		NPL	S100A8
		LRRC57	HLA-DRA
		TAF1B	DTX1
		PLEKHH3	TNFRSF13C
		CDC14A	ZNF114
		GEMIN8	DNAL4
		CPSF6	CCL25
		PPM1M	LIPA
		MED25	KCNF1
		SOS1	SKAP1
		CIITA	FNDC5
		NEFL	TMEM51
		HSPH1	BTN3A1
		BDKRB2	CREB5
		MITF	SLC10A4
		ZNF382	MRC1
		C1orf53	IFIT1
		WDR60	RASGRP1
		TNFSF14	DHX32
		ELF3	RNASE6
		COMMD10	BST2
		TMC8	EVL
		HEXIM1	THSD7B
		ISG15	CD83
		TMF1	PLEKHB1
		CAPN14	PAPLN
		ALPK3	SERPINB1
		ZNF253	TRIM48
		KCNA3	GRIA2
		IL13RA1	PIAS3
		ARVCF	LNX1
		SIPA1L3	CLDN6
		EEF1B2	MAFF
		HDAC8	PAK6
		VAV1	PEX6
		TM7SF2	UNC5C
		PCK2	SLC1A3
		SAMD3	IL18R1
		VAPB	CYSLTR2
		PKIA	GIMAP2
		TAP2	FCGR3B
		HECA	CHRNA1
		PXK	FAM53A
		ZNF420	KCNJ12
		HIBADH	C1QL1
		CYBB	HLA-E
		ETV4	PTK2
		TAPBPL	LSR
		C11orf45	RIN3
		TRPM4	PDIA2
		SUMF2	BTBD6
		PCDHGB2	PPT1
		ATXN7L2	SOX3
		SCAP	HOXD11
		TMEM53	PMCH
		NMNAT2	CBLN1
		CWF19L2	DNASE2
		ZNF597	PLEKHG6
		JRKL	PPARGC1B
		SCGB1D2	PLAGL1
		NINJ1	ARRB2
		C6orf136	FAM83F
		BAIAP2L1	TNF
		PNN	SLC7A7
		HIBCH	ACACA
		ZNF454	KCTD17
		RORC	CLEC7A
		HAPLN3	TBC1D4
		TUFT1	EN1
		LAT2	GPR68
		HDHD3	ARHGDIB
		CSF2RA	FRS2
		KCNH3	STXBP1
		ASPSCR1	NOVA1
		MRPS21	HLA-DQA1
		CD209	CD300C
		SLC2A4RG	SARDH
		IGSF1	CD3G
		CD8A	TMEM97
		ENPP2	CCL2
		RAB33A	SSX1
		FXYD5	APOBEC3A
		CDK10	ABI3
		PITX2	BHMT2
		PROM2	ITGA2B
		CD5L	TFAP2B
		ZNF629	MFAP3L
		IRF2BP1	CCM2
		OAS3	LIME1
		MAST1	APOL1
		DKK4	CORO2A
		PIK3AP1	ROR1
		STAT4	MYO1G
		GRHL2	PFAS
		WSB1	RORB
		ACO2	INSL4
		OAS2	TLR10
		SIGLEC9	VPS72
		FBXL20	DPT
		MVD	SLC4A2
		STRBP	APOH
		FADS6	TMEM86A
		FGFRL1	CMTM7
		ZKSCAN1	SDHC
		PLA2G2D	PARP15
		OSBPL3	MDN1
		EPB41L1	SAMSN1
		TSPAN15	TRIM24
		DBP	FBXO16
		RPS4Y2	KLF13
		DENND2D	CD300A
		ZNF626	TNFAIP8L2
		SETD1A	PCGF2
		OSCAR	PTPN3
		RHBDL1	AQP7
		PASK	MT1M
		ZNF232	CXCL10
		PCYT2	KIF1A
		ZDHHC17	STK4
		MYBPH	PLCH1
		RABEP2	MANEAL
		SLC25A1	IFI44L
		SLC26A4	TLCD1
		RPS9	TYROBP
		PBOV1	PLAC8
		RHCE	PF4
		ZNF444	CHD1L
		AIP	LAYN
		ABCB1	MYH14
		CDC42BPB	INSL3
		GLCE	SLC39A4
		KCNK1	CD63
		PILRB	SH2D3A
		ADA	PPP1R14D
		IFI27	ELMO1
		XK	NCF1
		ATP1B1	LAPTM5
		IGSF3	OGFRL1
		WDR24	HOOK2
		RNF39	TAS2R5
		CHRNA3	GPA33
		ZNF226	GPR137B
		ATP6V1B1	FLI1
		SYK	VSIG4
		PLXNB3	CHRM3
		GCAT	TFR2
		SELPLG	SOX12
		ARHGEF3	CLEC4G
		ELMO3	PFKFB3
		CSF1R	KCNK12
		BCORL1	DNAJC5
		SORD	TNK1
		SLC17A7	TP53INP2
		ZNF320	PDZRN3
		BACH2	CABP7
		ZNF34	MIXL1
		MRAS	APOBEC3G
		LILRA4	VAMP5
		GLRB	IL7R
		ARL4A	LCK
		RBM12B	KRTAP5-9
		RCBTB2	BST1
		RND2	LGALS3
		HCN1	ARG2
		TMIGD2	CSN1S1
		GLS	NUDT14
		FGL2	ZMYND8
		SRGN	ZNF468
		EFNA1	LRRC25
		INHBB	FSCN2
		CXCR6	TLR4
		ABHD6	DPYSL4
		CD9	CASP1
		C12orf4	PKHD1L1
		CHST11	ITGAL
		DAG1	CD4
		GDAP1	CHL1
		GPT	TMEM116
		PELO	CCR7
		CEP57	HEXIM2
		SLC37A2	SHKBP1
		GLYATL1	RNU12
		ZMYM1	IL16
		CACYBP	CXCL6
		ZBTB38	SCN4A
		NR1D1	KISS1
		ZHX1	BTN3A3
		KLK6	TIAM1
		PTGER4	UCN3
		ZIK1	RHBDD3
		ICAM3	FPR1
		LDB1	SIX4
		ITGAX	PCDHB8
		CYB5R4	LRRK1
		CAMP	CCL3
		APOBEC3D	FTH1
		HDAC9	GTF2I
		PLEKHG2	HCLS1
		RTKN	DPPA4
		YES1	LY9
		LMBRD2	GIPC1
		CCL20	RASSF4
		PDCD1LG2	SULT4A1
		RNF113A	GBGT1
		RWDD3	ALDH7A1
		C1orf162	BDNF
		ZNF175	C3orf33
		GRIK3	PDE3B
		IL10	NXPH4
		ACRBP	AMPD1
		MFAP1	FANCE
		RAB8B	DHRS9
		SPIB	AKNA
		CNKSR3	KCNN3
		ANGPTL3	TCL1A
		OBSCN	ZBTB32
		INPP5D	COL11A2
		PRPH	LIX1
		KIAA1549	SIGLEC10
		PTGS1	NLE1
		PPM1E	LONRF2
		TRIM21	DYRK2
		OCA2	CHODL
		CLSTN3	TRPV2
		PLA2G4D	RIPK3
		ERGIC1	STK31
		GMFG	SLCO2B1
		PADI4	MEIS2
		HOXC9	RRAS
		RIPK4	SYNE2
		DNM2	APOE
		AMPD3	JAG2
		RGS6	ANKDD1A
		HIC2	SOCS1
		SPINT2	TEX11
		CHMP2A	ARHGAP20
		SOD2	NPAS3
		HSD11B1	PLEKHA2
		CCL23	DIRAS1
		MSN	DSTN
		PCDHGA6	PPP1R16A
		SLC29A3	ADD3
		ASH2L	PIK3R5
		ZDHHC9	ANKH
		VAX2	DACT2
		CYSLTR1	LHCGR
		ABCB8	CNTN1
		DLG3	SLAMF6
		GREM2	DMRT2
		BRSK2	ITGA5
		FBXO30	ALOX12B
		SAMD13	AKR1B1
		MGAT1	FASLG
		SUPT5H	PTGDS
		CCT2	ZNF574
		CFHR3	FCER1G
		PIK3CD	TNFRSF4
		UCP2	SH3BP1
		TIGD1	KIAA0040
		FOXP3	ERG
		THEM5	ETS1
		GCA	HOMER2
		LPIN1	CD40
		GOLT1A	GABRB1
		RBM10	PANK3
		SNX8	ATP6V0A4
		LRP4	HLA-DOB
		MYO1F	CRLF1
		SIDT2	CORO1A
		IMPA2	S100A9
		USP43	GLA
		BLCAP	DKK2
		MUTYH	PCDH1
		OTUD3	PLTP
		GALE	ALOX5
		GMIP	HMOX1
		NUDT13	MPP1
		NDUFC2	MUC2
		PRRT3	GIMAP6
		GLT1D1	B2M
		KLRF1	EIF2S2
		CD72	C1S
		VKORC1L1	KCNK6
		NCR3	LILRB3
		CLEC4C	PLEKHO1
		CEACAM21	IL12RB1
		ST8SIA1	RASGRP2
		SEZ6	FURIN
		STX16	TRIM68
		IL17RC	HMGCLL1
		CBY1	VN1R1
		MAP3K14	SCN8A
		ZNF235	ZNRF3
		CHD6	LYSMD2
		TRAF1	CTF1
		SOX6	TPSD1
		CCL1	PIM1
		PLCL1	LSP1
		CHERP	PHKA1
		BNIP3	EFHD2
		TFB2M	KRTCAP3
		IL2RB	LENG9
		STK36	ZNF439
		ZNF671	REEP2
		HOXC4	TMEM61
		IDE	GAS7
		OGFR	ZNF594
		HSPA1B	CAND2
		PNPLA8	USP40
		HCK	PCDHA12
		TEAD3	SLC6A14
		RTN4R	SLC38A4
		PAG1	OSBPL8
		SHMT1	ZDHHC22
		FASTKD2	MYD88
		RAPGEFL1	KCNS2
		C3AR1	MCF2
		DLX3	CCNL2
		ATP8B4	IGSF21
		PCDHB13	SLAMF8
		EPHA10	ATP8B1
		REXO1	NCAM1
		FOXN4	LYL1
		ATP6V0C	CRTC1
		CRHBP	SLC2A9
		KCNN2	HOXD4
		TPD52L1	AIM2
		ARSB	PCDHB5
		KLHDC8A	STXBP2
		ZNF516	ST3GAL2
		ARHGEF19	PLA2G7
		ERC1	WIPI1
		ALK	HSD17B1
		CLIP1	NRTN
		ITGB7	CEBPA
		CH25H	PYHIN1
		TXLNB	EVI2A
		HPSE	HSPA4L
		SH3YL1	CRELD1
		SLC35B2	P4HB
		SOAT1	ESPN
		BTBD3	TRIM17
		DLG5	PLEKHG5
		PDE1B	ANKRD39
		ZNF223	ATM
		GBP3	MRPL23
		CAPN1	SLC45A1
		AP2S1	CKB
		AMFR	IQGAP2
		SH3BGRL3	TSPAN10
		PRSS27	HLA-DPB1
		SLC9A9	CD53
		ERF	HTR1B
		ASH1L	HLA-C
		CDKN2C	PNOC
		MATK	DBNDD1
		RAB24	IL17RB
		DISP2	MFNG
		NIPSNAP1	EPHX1
		CCRL2	CD84
		HCN4	HNMT
		STRN3	RTP4
		SIGLEC8	HYOU1
		IFI35	TGFBI
		IGF2R	CPLX2
		NTHL1	MYADM
		DLGAP1	CEL
		RSAD2	ZNF408
		PLEKHG3	GSTO1
		FLNB	DNAJC5B
		TM2D1	FOXP4
		LRCH3	BCL2L10
		GNAL	SPIN3
		YOD1	ZNF703
		NBR2	BPHL
		GNAT3	NFE2L3
		ZNF432	CMYA5
		DOK1	TNFRSF18
		RYR1	GRIN3A
		SPN	CCL5
		TNFRSF10B	HSF2BP
		BTN2A2	TXNIP
		MAF	MRPL41
		LPXN	NUDT16L1
		ELL3	SLC6A12
		C9orf72	APBB1IP
		PACSIN3	PAQR8
		CD14	ADCY1
		BLK	VANGL2
		ATP6V0D2	STK17B
		SEC23B	ATF7
		RPL13A	TRAF4
		PSD3	IL1RL2
		GSN	EN2
		NLRP3	AP1B1
		DUSP8	NPDC1
		PTPN7	MPEG1
		APOA2	LIAS
		TTC7B	C1QC
		EPS8L1	LRRC8C
		GRIN2C	HMGB3
		IDS	EPSTI1
		ZNF43	CCR5
		SCHIP1	FAM20A
		GDPD1	NELL1
		MANEA	ARHGAP4
		TOM1L1	CR2
		DCAKD	SYT2
		DAB2	CMKLR1
		CD3E	TMEM41B
		TMPRSS13	ZBTB39
		AIF1	CYP2C8
		MINK1	RAB3IP
		APOA1	PYCARD
		ADCY7	CDH15
		RPS28	COL2A1
		GPR174	CSF2
		GRB7	CHDH
		RAB18	PIM2
		ENDOG	ECEL1
		SQLE	FOLR2
		CHCHD5	ODC1
		TRAF5	NCF2
		USP46	JMJD4
		KLRD1	KRT24
		KIF21A	PRSS21
		LPIN3	PTPRCAP
		TACR1	GM2A
		NCKIPSD	CNGA1
		SIX2	ITGA4
		HABP4	STAG3
		RBP5	FCN1
		FBXL2	AP1S2
		PRCP	PKD2L1
		MEGF8	RCN1
		PDE9A	HSD17B13
		NBN	GNAI2
		TBC1D10C	TTLL11
		LMBR1	TMEM156
		SPOCK2	TMSB10
		SETX	LILRB4
		FCAR	ADAMDEC1
		PTDSS2	C14orf119
		TCIRG1	RNF126P1
		PTK6	ANXA5
		NLK	ID1
		SLC25A29	CNFN
		GFER	SPP2
		LGALS12	DKKL1
		SH2D1A	PMFBP1
		DLL1	SYN1
		STK17A	CD274
		GPSM3	RCSD1
		ZNF430	GSTZ1
		WDR31	SIGLEC5
		YTHDC2	CNGA3
		NT5M	RNF130
		PLA2G2A	MARCO
		ZNF101	PPP1R3B
		FMNL1	HS1BP3
		KCNMA1	LEF1
		ARHGAP9	GTF2IRD1
		GFAP	SHARPIN
		DENND1C	PHACTR1
		OAS1	CSK
		CBLN3	ITGA1
		ZNF717	ZNF569
		AFMID	PRAF2
		PRKCI	DEF6
		IL10RB	TMEM92
		WRN	VAMP1
		LHFPL2	TAP1
		RASGRP3	PSORS1C1
		ANKRD12	ARHGAP30
		DLD	LGMN
		DPEP2	PIK3C2G
		PPP1R9B	L2HGDH
		NAGLU	HLA-DRB5
		IGSF6	DOCK11
		ITGB2	CD37
		SLCO1A2	B4GALT3
		SCARB1	CR1
		SNAI3	ZNF683
		CRTAM	SLC29A2
		TNC	GIMAP1
		GPR3	AKT1S1
		IQCC	IL2RA
		CASP5	PRR7
		MYOT	APOL3
		ADCY3	TRPM2
		CYP1B1	EPB41L3
		COX6A1	TMEM101
		CDK2AP2	SP140
		SLC8A1	GATA3
		YEATS4	F12
		DLX4	POPDC2
		CCDC57	LILRA2
		LCP1	IKZF3
		CHMP1B	TLR8
		FGD3	CLEC10A
		PARD3B	SELL
		CD22	COL8A1
		PARVG	GPR157
		ABCG1	CARD9
		RANBP6	PSTPIP2
		BTK	TRAF3
		PLEKHA8	BCL11B
		SLC16A6	BCAT1
		SERPINB9	GFRA3
		CCR1	NUDT18
		GDPD3	SNX10
		FNBP1L	GADD45A
		SERTAD3	CLCNKB
		CBX5	IL15
		PIP5K1C	KCTD8
		DCXR	KCNK2
		OXCT2	NKD1
		RHBDL3	SH2D3C
		EBPL	GZMB
		RASL10B	HERC5
		C1orf54	DAPK1
		ZNF749	SLC2A5
		DHRSX	EFNA4
		GAS8	HHEX
		MT1E	TNFSF13B
		PRDX2	CAPG
		SAMD4B	HAND2
		BATF2	PLCXD3
		APOL4	C2
		MLKL	IL2RG
		ZNF692	APOB
		NT5C2	TNS3
		PTK2B	AP1M2
		GNS	PPL
		LAPTM4B	SPAG1
		ADAM15	LY96
		BCL2	SLC44A5
		ITPK1	PLAU
		PHTF2	GLIPR1
		PRF1	GK
		GNG2	LSS
		U2AF1L4	OPHN1
		VENTX	CD86
		LZTS2	C5AR1
		TTC6	EAF2
		PIM3	GRTP1
		SLC38A6	IRAK3
		SLC4A7	STARD10
		RPS18	FOXP2
		MYCBP2	DIO3
		KEAP1	NOG
		WNT4	GNA15
		ROCK1	NPAS1
		ABLIM2	POLR3GL
		C1QA	SLC25A19
		TPST2	IFITM3
		PLCL2	RASA3
		TBC1D1	KLHL4
		ZNF117	UBE2E2
		AGTRAP	SYT1
		SLC25A18	DDX43
		FBN3	TNIP3
		ESR1	ANXA9
		SIRPB1	MRPS26
		MAN2B1	SLA2
		SEZ6L	DOK2
		CLEC4E	CASP10
		CHRNA6	NTAN1
		KLF12	CXCR4
		PVALB	TTLL12
		AP1G2	GIPC2
		CXCL11	SUSD4
		TRPM6	RSPO4
		GZMK	FSTL4
		RAG1	TXNL4A
		RTN1	THSD4
		TLR1	TMEM106C
		BANK1	TFAP2D
		CLEC2B	MARK1
		ATP4B	LRRC58
		PSMB8	HLA-DMB
		RAPH1	HAS2
		DCK	MIA3
		MESP1	LSM14B
		MCOLN1	FUT9
		WNT9A	CABLES1
		FOLR3	SAMD1
		ZNF14	STAB2
		KLC4	CELSR2
		TMC4	HUWE1
		S100B	DLEU7
		SLC2A6	CCL18
		CLEC4A	GAMT
		NAV2	OSM
		DGCR2	RHOG
		SYT5	MS4A6A
		KIAA0753	ZBTB12
		PXMP2	MAP7D2
		PTPRO	TNFAIP2
		NOL3	PSMB9
		ALOX5AP	MDFIC
		CSF1	SLC11A1
		MYO1D	PGM5P2
		LCMT2	G0S2
		SOCS7	IRF5
		CDC42SE2	PTGDR
		MCTP1	HLA-DOA
		ZNF100	FAM20C
		DHRS4L2	CTSB
		RHBDF2	COL25A1
		ATF7IP2	ASTN2
		KCNB2	HEY1
		KIAA1217	FBXW5
		PHOSPHO2	HBD
		PTAFR	CXXC4
		GOLGA2	MS4A1
		CDC42EP3	ZNF579
		PCSK4	ESRRA
		ADAM9	SIX1
		SECTM1	CD1D
		MAD1L1	DMXL2
		S100A8	USP27X
		GOLPH3L	SPSB2
		PARD3	PCSK2
		GPHN	TLE4
		MPP5	PCDHGB1
		ZDHHC19	MMP12
		CCR2	TPD52
		NPAS2	OLR1
		PAF1	RAB39B
		HLA-DRA	TMEM129
		PAXIP1	RS1
		NARS2	ENTPD1
		DTX1	PDPN
		DNAL4	MMP9
		NEFM	TTC22
		CCL25	RGS10
		FAM53B	CRAT
		LIPA	HSH2D
		SKAP1	CD19
		TMEM51	ARHGAP15
		BTN3A1	RNF152
		RASEF	RASD1
		SEMA4F	SH3BGRL
		CCDC69	RUNX3
		MRC1	B4GALNT4
		IFIT1	MYBPC2
		LRRC8D	FGF9
		PRR3	TNMD
		RASGRP1	ALG9
		NF1	GPR34
		DHX32	ARRDC5
		RNASE6	IPO4
		BST2	FBXO2
		CSTB	MICB
		ZMYM2	IFI30
		EVL	GIMAP4
		PCDHB19P	CREB3L4
		AKAP1	C6orf52
		ACAD10	FSTL5
		TMEM45B	LETM1
		WTIP	OTUD5
		CD83	NR2F6
		SUCLA2	AOAH
		BDP1	PTPN1
		ELAVL4	FLG
		MYO10	PLCG2
		PAPLN	SUCNR1
		CCNH	GNB4
		ATP6V1C2	MSC
		C8G	CACNG4
		SNCA	PAQR7
		STARD3NL	TRAF3IP3
		MAN2A1	ID2
		SERPINB1	SIDT1
		TIMM17A	IL6
		GRIA2	CETP
		PIAS3	TNFSF10
		LNX1	C1QB
		PANK1	IRF1
		ADAM10	TBC1D2B
		DDX25	CST3
		MRPL1	P2RY14
		PAK6	SLC1A5
		PEX6	SAMD9
		DPY19L4	CCL24
		CYFIP2	SHB
		SLC1A3	CD6
		HAAO	ACP5
		IL18R1	DDIT4
		CYSLTR2	TNNT3
		GIMAP2	LRRC20
		CCKBR	GJB1
		FCGR3B	ITPA
		GAL3ST1	ACTB
		TRERF1	SLC35F3
		CHRNA1	CD52
		RAB40C	LITAF
		FAM53A	HK3
		KAZALD1	FAM89A
		TNFSF9	CD44
		HLA-E	SEC14L1
		LSR	SH3KBP1
		HSBP1	TBX15
		RIN3	B3GAT1
		PDIA2	POU2AF1
		CNIH2	KIR3DL2
		BTBD6	PCOLCE2
		PPT1	TREM2
		SOX3	WDR72
		VASH1	NFKBIL1
		ACE	ZNF397
		MKS1	PPP4R1
		DNASE2	SLC7A6
		ZNF160	CXCL13
		PLEKHG6	CST7
		TMPRSS11D	NELL2
		FDXR	FN3K
		PPARGC1B	FARP1
		PLAGL1	WNK2
		ARRB2	MAPT
		FAM41C	CD226
		TANC1	CORO1C
		CGN	MME
		TNF	CSF2RB
		SLC7A7	TNFRSF9
		ACACA	PYCR1
		IMMP2L	ZNF28
		KCTD17	UMODL1
		CCNB1IP1	ITK
		CLEC7A	RGS18
		CLEC6A	EPHB6
		IL5RA	POP7
		TBC1D4	PARP2
		KPNA3	KCNQ2
		SYT14	WNK3
		ARHGDIB	TIMP1
		FRS2	IL15RA
		SLC2A8	SDS
		NOVA1
		TNFRSF8
		HLA-DQA1
		CD300C
		SARDH
		TFRC
		CD3G
		CCL2
		APOBEC3A
		ABI3
		ITM2A
		IFITM5
		IRF7
		GNA13
		TFAP2B
		COX11
		LIME1
		CPB1
		APOL1
		MYO1G
		PFAS
		ZRANB1
		TLR10
		COL27A1
		HOXC12
		ADCK1
		RASA2
		SLC4A2
		NPM2
		NPB
		ETFB
		FMN2
		GPR141
		TMEM86A
		CMTM7
		ZNF227
		COG6
		PARP15
		KTN1
		EPB41
		SAMSN1
		THNSL1
		FGFR1OP2
		FBXO16
		ADPRH
		CD300A
		TNFAIP8L2
		DYRK4
		PCGF2
		PTPN3
		AQP7
		MT1M
		CXCL10
		STK4
		CCDC14
		IFI44L
		TLCD1
		TYROBP
		PLAC8
		CHD1L
		MYH14
		INSL3
		UGT2B11
		TRA2A
		ATG16L2
		CCL13
		TMEM81
		RTBDN
		ELMO1
		HSDL1
		BAGE2
		NCF1
		LAPTM5
		OGFRL1
		PTPRK
		HOOK2
		ZNF33A
		TAS2R5
		ANKS3
		SLC35A3
		GPA33
		GPR137B
		FLI1
		TRUB1
		BLMH
[truncated: 913 more rows]
