# Supplementary material for: Identification of lung adenocarcinoma subtypes and predictive signature for prognosis, immune features, and immunotherapy based on immune checkpoint genes
Source: Front Cell Dev Biol. 2023 May 10;11:1060086. doi: 10.3389/fcell.2023.1060086 (PMC10206047; doi:10.3389/fcell.2023.1060086)
Supplement: Supplementary file 12 [file Table7.XLSX]

## Sheet: IR-DEGs
IRGs	DEGs	IR-DEGs
FSTL1	AMN	HRG
INSL3	FCGR2B	ABCD2
TNIP3	KBTBD8	SIGLEC8
TRDD2	BTLA	SIGLEC9
TRBV7-4	DOC2A	FGF17
GRAP2	CRYBB1	LAIR1
RXFP3	PRG4	C8G
PSTPIP1	LYZ	FCN1
FGF7P3	EOMES	HLA-DRA
MEFV	GBP5	PIK3AP1
XDH	AHSG	CD53
EDN1	ALDH3A1	CD300A
NMBR	LY86	BTK
PDF	P2RY12	HPX
TRAJ42	GALR3	CRABP1
IGLV3-21	TFEC	NAIP
AEN	ABCD2	HLA-DOA
ARRB2	FGF17	BTLA
CXCR4	H19	IL21R
CMTM8	CXCL9	KBTBD8
MPL	IRF8	MSR1
IRAK1	HS3ST2	LST1
TRBV6-7	TRIM55	CMKLR1
IGF1	FXYD4	LAX1
TMSB10	GAL3ST4	TNFRSF8
G3BP1	CRB2	MRC1
CXCL3	LILRA5	CD86
PAK1	CARD14	HLA-DQA1
ANGPTL5	PILRA	MMP12
PELI2	LAIR1	BCL2A1
GDF15	NFAM1	FPR1
TRBJ2-5	TUBB8	TNNT2
RPL19	SIT1	CD14
PRKRA	PTCRA	CCL23
MMP7	SLC31A2	CCL18
PRKCG	PLA2G10	CCR2
NOS2	STX11	SIT1
GZMM	DHRS2	IL10
TRIB3	LY6G6C	TREM2
TRGC2	HPX	GPR174
HRG	MSMB	TLR7
HTN1	CD33	CD28
FGR	PNMT	TNFSF8
DEFB133	CCL8	CYP24A1
HLA-DRB4	LILRB1	SLAMF7
ABCD2	DOCK2	CD209
SEMA4D	HAMP	CXCL10
FGFR1	DPYS	GPR31
MET	CD244	LYZ
IGLV5-52	SIGLEC11	FCGR1A
MTNR1B	KRTAP5-1	AHSG
HLA-DRB5	CYP2W1	INHA
MAP3K3	MS4A7	ICOS
CASP6	HTRA4	IL1B
PCSK1	P2RY13	MARCO
TRP53	LILRB5	CD200R1
IGKV1D-13	TNNT2	PDCD1LG2
IGHD2-21	ICOS	FCER1G
NR4A2	SPINK4	C1QA
OAS1B	TDRD6	HAMP
IGLV7-43	SLC5A12	DNASE2B
ARF6	GPR65	CX3CR1
CXCL13	GPX2	P2RY10
TRBV10-3	CLCNKA	HAVCR2
ENDOU	TTLL6	KRTAP5-8
NFIA	FCGR3A	AGTR2
LEP	ITGAM	GNRH2
CSF3R	RSPO1	CCR6
WDR34	LCP2	LILRA4
RPS6KA5	APOC1	S100P
MAPKAPK2	TM6SF1	C1QC
EPS8	CD180	CD4
TRGJP1	SOST	SH2D1A
OXT	TESC	FCGR2B
SHC1	IL21R	CYSLTR2
CCL22	ITGAD	HS3ST2
IGKV3D-11	SIGLEC7	LCN12
LHB	LILRA6	FCER2
ITGA3	CLEC12A	CXCL11
TRDJ4	CXorf21	CRHR2
IGHD2-15	WT1	TRIM55
BMP3	PRH2	PTPRC
IGKV3-20	TTTY14	CLEC4C
MTAP1S	MSLN	CD52
MAP1LC3C	CYP4F3	IL13RA2
S1PR2	FCER2	P2RY13
IGHG4	INHA	HLA-DMB
RUNX3	CRABP1	RGS13
TRAV1-1	TIMD4	TNFSF18
PRKCB	EVI2B	CLEC10A
HCST	AQP9	CCL24
SIGLEC8	CD163	IRF4
C5AR1	HSF4	SERPINA9
IGLC7	LILRB2	RHOV
A2M	DNASE2B	CD244
PIK3R5	CD48	IL2RA
MIR132	MS4A6E	CCR1
IGHV3-49	LCN12	PIK3CG
SIGLEC9	CD28	CCL8
TRAV24	CD200R1	MUC2
IMPDH2	PTPRC	GIMAP6
TLR1	CD300LF	CXCL9
TRAJ7	P2RX7	WT1
ELANE	PLEK	SIGLEC10
TEK	HAVCR2	CD48
EED	P2RY10	TCL1A
IGHJ3	TIFAB	TAGAP
IGH	TNFSF8	CD300LF
GRK5	CPVL	CCR5
PDIA3	UPK2	IRF8
IGKV@	IL4I1	SIGLEC11
SPAG11B	GPNMB	SIGLEC7
CD1A	BSND	CCL3
HSPA1L	SERPINA9	TINAG
TRAF5	PCSK9	CD274
SSTR2	PKD1L2	CSF2RB
IFNL1	APOC2
BIRC5	PIK3CG
PPP3CA	MNDA
UTS2B	CEBPE
LTBP4	UPB1
GHR	GPR84
PYY	RASGEF1C
CLEC1B	MSR1
CCL19	FCGR1A
MKNK1	F13A1
APOBEC3G;APOBEC3F	SPP1
GBP7	LILRA1
TAFA2	ITLN1
MFF	CD80
CLEC4E	MS4A4A
IGLJ6	S100P
SERPINB9	TRAT1
TNFRSF9	KCNA2
MIR302B	TAGAP
FGF17	COL9A3
LAIR1	LST1
AVPR1B	TLR7
IL17RC	IL1B
TRAV8-2	GNRH2
TRAV18	PLAC4
CORO2A	CCR6
GATA6	AGXT
ANGPT4	BTN1A1
PF4	CABYR
MIR517C	FOXL2
BPIFB2	CYBB
NR2E3	MAPK15
AIRE	CD209
RFXAP	PIK3AP1
IP6K1	SIGLEC9
C3	AGTR2
GRB2	PLA2G2D
PIN1	GRPR
ORM1	ATP6V1B1
FOXA2	CSF1R
HSPD1	LILRA4
F2RL1	SLC37A2
IGHV3-33	PDCD1LG2
PTK2	LAX1
GDF10	IL10
BTN3A1	IL13RA2
IGHJ6	HSD11B1
FABP5	CCL23
MIR200C	CYP24A1
PLXNA1	PROZ
SORT1	CLEC4C
IGHG2	HCK
USP7	C3AR1
2023-03-05	SIGLEC8
HS2ST1	SPN
C8G	CD14
TRAJ25	ATP6V0D2
SPPL3	AIF1
IL1F10	GPR174
KIR2DL4	RHOV
SERPING1	TNFSF18
TICAM2	SH2D1A
TRBV17	IGSF6
BCL2	ITGB2
NFKB2	CRTAM
TNFRSF10A	CASP5
KL	LCP1
TRBV5-5	BTK
IGHV7-4-1	CCR1
IL24	TINAG
GM16379	SIRPD
SC4MOL	FCRL4
OBP2A	C1QA
GKN1	SIRPB1
PSMD3	CXCL11
PIK3CB	GZMK
FCN1	KRTAP5-10
RHEB	RTN1
TRAV2	IRF4
ERBB2IP	CLEC4A
DEFB119	SLAMF7
HLA-DRA	PTPRO
TRAJ32	ALOX5AP
THRB	PTAFR
NPR1	RGS13
CELA1	MOGAT3
PSMD11	CCR2
NLRP10	HLA-DRA
NLRP5	FTCD
EDNRA	LIPA
RAET1A	MRC1
TRDD3	RNASE6
TFR2	IL21
RICTOR	CRHR2
RAG1	C8G
GHRL	SLC1A3
MFN2	CYSLTR2
ESRRA	TAC3
IGLV3-25	SLC7A7
IRF3	CLEC6A
TRAV41	TNFRSF8
TACR1	HLA-DQA1
GMFG	CD300C
PIK3AP1	IFITM5
LTBP1	INSL4
PENK	GPR141
GNRHR	SAMSN1
FGF8	CD300A
SLAMF1	CXCL10
PPBP	TYROBP
LRRK2	GPR31
HTR3A	CCL13
LIF	NCF1
OXTR	LAPTM5
SDC2	VSIG4
CNTFR	CYP4F11
FGF6	CABP7
FGFR3	LRRC25
IL5	TLR4
AGT	PKHD1L1
GPHB5	CD4
DEFB114	GFI1B
CGA	FPR1
PTGES	CCL3
ATF7	TCL1A
OPRK1	COL11A2
FGF1	OR4C6
IL6R	SIGLEC10
IGHV3-38	SLCO2B1
NFIL3	DQX1
CD53	FCER1G
CD300A	ACTL8
WDR62	MUC2
IGKV1-33	GIMAP6
CIITA	SLAMF8
AKNA	PLA2G7
CRP	BCL2A1
FANCC	EVI2A
ZFP423	CD53
CMTM3	KRTAP5-8
HSPA8	CD84
RARB	DNAJC5B
ULBP3	MPEG1
MIR372	C1QC
DHX15	CX3CR1
NEU1	CCR5
MS4A8A	CDH8
ZBTB20	CMKLR1
PNOC	CALML6
SIGLECG	FOLR2
EPGN	FCN1
BRD8	LILRB4
IGHD5-5	ADAMDEC1
GSTP1	CD274
GMFB	MARCO
ARHGAP15	HRG
LTBR	CR1
TCF4	MUC6
CCR3	IL2RA
APOBEC3B	TLR8
NR2C2	CLEC10A
IGLV3-12	KRT17
TRBD2	CLC
STAT5A	TRPM8
IGLV2-23	SLC2A5
MIR122	TNFSF13B
PAEP	CD86
PTPN2	DOK2
GIPR	ALPP
RABEP2	TLX1
AP3B1	HLA-DMB
NFYA	CCL18
IL27RA	MS4A6A
NCR2	DCST2
NRG4	HLA-DOA
IL5RA	HBD
MLN	OGN
DEFB125	MMP12
AHNAK	PDPN
UBE2W	SLC17A8
PTGER1	B4GALNT4
IGLV1-44	KCNJ10
TNFSF12	GPR34
IL17C	GIMAP4
PSMD5	AOAH
AHR	C1QB
SYTL1	NAIP
XCR1	CCL24
UBE2N	GFRA2
PLXNB3	CD52
NFE2L2	PAGE5
IL23R	HK3
SPINK5	TAT
NR1I3	HCRTR2
ACVR2A	TREM2
KLF4	CSF2RB
MIR181A2	RGS18
IGHV3-13	KCNQ2
IGHD3-16
KLKB1
UNC5CL
IFI27
KLRC1
HP
BTK
GDF9
IL1RL2
TRAF2
HPX
WNT3A
IL22RA2
IFI16
GALR2
TRBV25-1
USP4
BMP6
TRAV8-7
NPPA
OAS1A
NFYC
TBX21
PPARGC1A
CCL26
SEPTIN7
LCN1
OAS1F
TRAV34
MIR485
MANF
TRAV6
NENF
IGHD
TRGC1
TPT1
CRABP1
S100A3
ZFPM2
DEFB4A
S100Z
TRBV5-6
MBL3P
PDGFRB
MIR208B
ADRB1
IL17D
CEBPD
CARD9
TRBV7-8
LCN15
CGB3
IL28B
JUND
CSRP1
CTSB
TRAJ41
OAS1
NOXA1
ZFP36
TNF
IGLC3
C1QBP
GDF2
SEMA3G
IGHD5-24
NGFR
IKBKG
IL23A
PCBP1
BMP8A
AMELX
C5
EGF
TRIM45
GNRH1
IL1A
TMED7
HDGFL3
CMA1
PDGFD
FYN
FAM3B
IGLJ3
ITGB1
IGHV7-81
CCL14
PI15
TRAJ10
PSMC4
UCN2
TRAJ4
NAIP
PSMD8
DEFA1B
HLA-DOA
TANK
PGLYRP1
IL8
RCAN1
IRF7
PELI3
WFIKKN1
HSPA2
MIR16-2
THPO
NFKBIZ
TNFRSF17
TRBV6-3
LGR5
JAK2
IGKV6D-21
TNFRSF1A
NKIRAS1
CASP1
CD8A
ATG7
TRBJ1-3
GLI1
BTLA
SFTPD
XIAP
IL13RA1
WNT5A
SECTM1
TRAV3
IFNAR1
SLC29A3
LGALS4
PTGS2
BMP7
B2M
OSM
APOBEC3A
OLR1
DAGLB
TRIM63
IGHV3-21
IL31
AGER
CTNNB1
TRGV3
TRAJ33
FGF12
IGHV1-69-2
MICA
GPR33
ANKRD17
TRIM56
IL21R
IL29
IL20RA
ELF4
ELF1
TLR5
MIR141
KBTBD8
TRAJ38
FSHR
CD200
TRAV26-2
GCGR
NPY
MAP3K7IP1
IL18
NCK2
BMP15
CTSK
TRBV12-5
HNF4G
SIGLEC1
PRKDC
IGHA2
CCL4
MSR1
TRPM2
MS4A8B
PSMD2
TOR2A
S100B
CLEC4M
BMP2
TRBV11-2
ESR1
TAC1
SPAG11A
TRAIP
SST
LCN9
PRF1
NFAT5
LST1
FCNB
CDK4
ACE2
PRMT1
CMKLR1
CD79B
FLI1
TNFRSF19
IGHD6-25
IFNAR2;IL10RB
TRBV5-7
TRIM42
IL15RA
CALCOCO2
BPIFB6
NFATC3
SNCA
ITK
ESRRB
NR1D2
IGHJ2
KLRC4
HRAS
1700021K19RIK
RBP7
DEFA5
TNFRSF10C
MAP2K4
LAX1
TRDJ2
NEWENTRY
CD72
IL36G
DHCR7
OSTN
DEFB121
PROS1
FGFR4
PSMB8
LIMS1
VEGFA
SREBF2
TRIM14
CSHL1
LCN1P1
DEFB130A
PIK3CD
AREG
TINAGL1
TGFB1
ACKR2
TUFM
GAST
PSEN2
PGLYRP4
MYC
NTS
NR4A3
YJEFN3
TNFRSF8
BIRC2
BCL11B
ULBP1
SOCS3
TRAJ21
TRIM12C
CCNA2
S100A16
IL10RB
PARK2
IGLV1-40
OTUB2
GP2
IGHD6-13
FGF22
CHIT1
MIA
PCSK2
PI3
NLRP9
MRC1
IL1RAPL1
MAVS
TRAV21
BGN
GAL
APOBEC3F
COCH
TRAJ58
IL13
CD86
SLC11A1
ICAM2
MIR21
GSK3B
KIR2DL1
TRAJ19
TNFAIP3
IGLV5-37
DUSP10
CRLF3
APOM
TREML2
PIAS1
ADCYAP1R1
STAT1
DEFB106B
HLA-DQA1
LRRFIP1
NRTN
IGLV3-16
IGKV2D-29
MMP12
IL18RAP
TK2
COLEC12
TNFRSF25
SLIT1
TNFSF13
CARD16
STMN1
MIR203
GUCA2A
BMP10
DLL4
SLAMF6
HTR3D
CER1
PTGER4
IGKV1-8
CCR7
TRIM47
TRIM6
NR2F2
BCL2A1
SFTPA1
ANGPTL1
CXCL17
PLXND1
NLRX1
PRDM1
SLC22A3
UCP2
P2RY14
PPP1CA
TRIM24
PROC
TRAJ26
PLXNA4
SYP
FPR1
DEFB4
TRBV16
TRAJ36
GNLY
TNNT2
CCR4
KIR2DS5
CD14
IGKJ4
PPARD
FSHB
KDM4A
IGLV1-51
XCL1
ANXA2
YBX1
BPIFB4
IGLV8-61
TRAV1-2
IGLC6
SCTR
GREM2
LGALS2
INSL6
NR3C2
C4B
SHC2
IGHD3-9
BLNK
CHGB
IL19
IRAK1BP1
TRAV19
FAM3C
UBR1
EIF2AK2
CCL11
CST4
PPY
IDO1
CCL23
ADRBK1
LUM
C1S
HMOX1
CD1B
FCGR2A
MC4R
INS
FLT1
ERAP2
IGHV5-51
HTR1A
TRAV8-3
SIAH2
PDIA2
IFNE
IGHV4-28
HSA-LET-7E
EIF4E
CLEC4D
RCOR1
SIGLEC15
EBI3
GBP10
LALBA
FCGRT
ADA2
NXN
F2RL2
BPIFB1
CRHR1
IL20
TRAF6
CCL18
AXL
CCR2
CRABP2
IFNA7
GATA3
IL17RD
TAFA1
SIT1
PPP3CB
TRAV27
ANGPTL4
IGKV6-21
CXCR1
RNF31
NAMPT
PTGER2
RAD23A
IGLJ
GDNF
MIR497
IRAK2
IGHV2-70
HMGN2
CCL3P1
TRAV30
MFGE8
SH3BP2
CRH
MAP3K7IP2
IL10
AMFR
CNPY3
MAPK1
TRAJ54
PGF
CORT
TRBJ1-6
TLR10
KITL
GPSM1
TSC1
IAPP
LRP1
RIPK3
TNK1
RAET1L
OLFM4
CALCB
SAMHD1
PPP3R1
SEM1
LILRB3
SCG2
SPI1
IGKC
DEFB130B
TREM2
PADI4
SF3A1
TRBV3-1
TAP2
TNFSF11
IGKV1-13
DEFB134
OSGIN1
GPR174
CXCL2
AKT2
GNAI1
EGFR
IKBKB
C19ORF29
TYK2
NDRG1
RASGEF1B
SOD1
TRBV2
MIR130A
CXCR3
FSCN1
TRAJ13
CYSLTR1
TRIM66
TRAJ45
MIRLET7B
CTLA4
TRGJP2
NR4A1
POLR2F
AQP3
TRBV10-2
GALP
SIRPA
PURA
HC
CREB1
APOH
LCN10
TLR7
RNASE7
NEO1
LGALS3
IGKV3D-7
LAT
CLEC7A
HSPA14
PDGFA
IGKV1-27
IL17F
IL4
CD28
RBP2
SMARCA4
TRHR
RPS6KA4
TPSB2
MASP2
OAS1C
GBP1
IGHV1-69
DEFA1
TCEB1
CCL3L1
TRAJ61
AMBN
HLA-DPB1
STAT5B
PSMD6
IGHV1-8
CTSE
ATF2
SCT
OAS2
NOX3
IGLV6-57
DEFB115
CCNT1
CD74
PLSCR1
KRT16
VENTX
APOD
TNFSF8
TMEM126A
NOX5
NCKAP1L
IGHV4-30-2
MAPK8
MIR378
MFN1
C5AR2
NRG3
NLRP11
IFNW1
HLA-DQA2
MIR199A-1
F2R
THBS1
PIK3R2
ABL1
MCHR2
MAP2K7
GZMB
TNFRSF21
FCGR3B
BMP1
VIP
CALCR
MC2R
DAXX
HLA-G
GPER1
CYP24A1
CYTIP
MYDGF
MAP3K12
HSP90AB1
MOLECULEID32847
SEMA6D
PMAIP1
LMBR1L
CMTM4
S100A2
C2
NTF3
EIF4EBP1
APLN
PSMD10
FER
IGKV1-39
IGKJ1
IGHG1
DEFB4B
TRGJ2
IL25
RASGRP3
GDF11
SEMG2
IL28A
CCL1
CD247
TRDV2
LACRT
SOCS1
IL17RA
PTH
EGLN2
TNFRSF14
ID2
ROBO3
DEFB118
TRIM28
DDX21
LRSAM1
FGF5
RB1
CETP
IGHG3
HDAC11
CSPG5
PTPN6
ADAR
PLXNB2
IGHV4-59
WFDC2
PSMD4
IFNLR1
NUMB
TRAV12-2
HSA-MIR-146A
SFTPA1B;SFTPA1
TNIP1
INHBE
CD70
GLRX
SAA1
MAP3K4
PF4V1
REG1A
SH2D1B
SRC
KNG1
BPIFA3
MTA1
ITGAX
NR0B2
IGHV2-26
IRF2
SLAMF7
PGR
IGLV2-8
IGHJ5
FCRL5
IRGM1
IL1RN
FGF10
DEFB131C
SDC3
NR2F6
MC3R
RAC3
MAFB
NLRP4
FGF16
ADIPOR1
FABP6
THRA
DDX17
PTGES2
IGKV2D-40
CMTM5
TOMM70A
CD209
TRAJ40
CLEC4N
SBDS
TNFRSF18
CXCL10
NLRP8
IGHV3-30-5
DDX1
GPR17
PLG
TRAV10
IGLV3-32
GPR31
IL10RA
IL36RN
NR2C1
HERC5
ARG2
TNFRSF13B
TSLP
IGLC2
IFNA14
FFAR2
IL4R
CCL5
TP53
IGHV1-38-4
OTUB1
MIR373
CHP1
MX1
PSMC5
TRGV2
VASP
FGF13
DEFB112
RELB
NLRP1
KIR2DS1
TGFBR3
CCN1
SIGLEC5
MAP3K7
PDCD1
TRBV4-3
TRAJ30
NCK1
CDKN1A
GPR32
IL32
TRAV12-3
CAT
PRKCQ
CD8B
PAK4
TIRAP
CNOT8
ADAM17
CTNND1
LYZ
TPM2
ITCH
IGKV6D-41
SEMA4F
ELAVL1
IGKV1D-12
PIAS4
IGHD3-10
BNIP3L
CFLAR
PIK3R1
GRP
KIAA0226
PDGFRA
TRAV4
TRAJ24
ADM
GHRHR
UCN3
IL17B
CD22
FCGR1A
FPR2
CD47
OAS1G
TRAV7
PRKACA
NFYB
RORC
IGHV3-11
SOCS5
IFIH1
IGKV1-9
IGHV3-64
TRAJ47
PYDC3
AZI2
SEMA4A
XRCC5
WFDC12
AHSG
TRAJ3
INHA
HDAC1
ATG12
MASP1
SLURP1
TRAJ17
ICOS
NFKB1
SIRT1
TNFRSF6B
KIR3DL3
IFNA6
SEMA3F
IGHD1-7
PCBP2
IL1B
GDF1
ACTA1
S100A7
MARCO
SIGLECH
CXCR6
HLA-DOB
ELP2
VGF
CD200R1
IGF2R
BMX
TRAJ18
FGF21
PDCD1LG2
IL12B
IGLJ2
POMC
FCER1G
IL9
TRDV1
LY9
NLRP12
AI607873
DNM1L
IGHD7-27
RP5-1000E10.4
IL28RA
NFKBIA
CLEC11A
TOLLIP
TRAV20
ALB
C4BPA
IGHV1-58
C1QA
TPST1
CEACAM1
HAMP
SREBF1
DCN
DLK1
NOD2
IGHV3-35
DNASE2B
HSA-MIR-98
S100A12
TREM1
IGLV10-54
TRP63
IFNAR2
HLA-C
SLIT2
SEMA6B
CX3CR1
DEFA20
TLR2
HTR3E
IGKDEL
CBLC
GDF7
CGB8
CRLF2
P2RY10
PSME2
TRAV14DV4
DHX58
IGLV4-60
CASP4
IFITM1
TRBV15
BPI
IL18R1
BCL10
TRBV10-1
SERPINA3
GAS6
HLA-DRB3
TSHR
STAB2
IGLV5-39
IRF9
TRAFD1
GM4955
TRAJ37
BACH2
FABP2
OBP2B
CLEC9A
MIF;SLC2A11
TECPR1
PPARGC1B
ACTG1
CALM1
DEFB129
GLP2R
HAVCR2
R3HDML
PLAUR
MAP2K3
FLT4
FAM3D
NDP
BMP5
ESR2
KRTAP5-8
AGTR2
TRBJ2-6
IGLV3-22
IGHD4-23
MID2
BRAF
SIVA1
CD3E
EPO
TRBV11-3
IGKV1-5
IGHJ1
PGLYRP3
AKT3
LY96
TRIM36
IL1R1
IGHV6-1
LTBP3
AMHR2
FABP9
KCNJ8
KIR2DL5A
PROCR
IGHV1-24
RANBP9
CGB1
LCN8
HGF
TYMP
IFNA21
INSIG1
NR1D1
TRIM5
PYCARD
MIR29A
ITGAL
IGHV4-31
NKIRAS2
VPS45
IGLV9-49
KAT2B
SMAD6
TRIM62
IGKV1-16
NAIP2
BMP8B
TRADD
VEGFB
SCARF1
ACKR3
TRAV36DV7
TDGF1P3
IGLV3-9
IFI202B
C9
IGLV1-50
ARTN
NLRC3
CD1C
TRBV5-8
IGKV1D-39
IFIT3
AVP
HMGB1
GNRH2
CCR6
IL2RG
PLXNA3
ESM1
BAIAP2L1
IGLV1-36
RBP5
PTGER3
IGKJ5
IGKV1-6
ZAP70
PTN
RNF135
IL12RB1
EIF4EBP2
HSA-MIR-146B
DHCR24
IL26
BID
NMB
CXCL14
RGMB
CYBA
SOS1
MIR146A
TGFB2
SEMG1
PLAU
RAC1
TRAJ53
LILRA4
MIR328
PTEN
ANXA1
C1R
HSA-MIR-148B
MALT1
DEFB117
KIR2DL2
ILTIFB
S100P
TICAM1
C1QC
TRAJ15
TRGJ1
C8A
LGR6
DCK
TRBV19
RFX5
IGHV3-7
RAET1C
IGHV3-72
HMGB3
NLRC4
UCN
DNASE2A
GNAI3
CD4
GABARAP
NUP214
IGL
IRF1
TRIM23
FABP7
PTK2B
IGHD6-6
CD1D
MBL2
PLAAT4
NGF
RNF41
SH2D1A
CD209A
NRP1
BPIFA2
TRAV9-1
NR2F1
TRIM22
TPP2
NLRP3
ECPAS
GJA1
JAM3
GNAI2
KIR2DS3
IGHD1-26
IGHD5-12
FGF11
ACVRL1
ASCC3
CCBP2
FCGR2B
NFATC4
MAP3K5
RXRA
CLDN4
DEFB1
SIGLECE
NOS1
TBK1
BMPR1A
PRL
HLA-H
IGHD4-4
TRDJ1
MMU-MIR-29B-1
NR1H3
ABCG1
SQSTM1
CCL4L2
MIR149
NFATC1
CCR9
RAC2
DEFA4
CCL3L3
TRAJ9
PROK2
PLUNC
TRIM60
TRBV24-1
PTPN11
SMAD3
ATF3
HSA-MIR-132
CARD11
DEFB116
UCHL1
PTGDR
IGKV1D-8
PLCG1
PLK1
CARD18
RFTN1
NEDD4
PPP3R2
GDF6
TAPBPL
TRAJ29
MIR125B2
DICER1
TRAJ23
NPPB
CEACAM8
CNOT4
PGRMC2
UBE2I
PSMC2
IGLV3-10
IGKJ2
CMTM1
IFNA2
PLA2G2A
PLTP
ANGPTL3
HRH4
TRAJ34
LGALS1
CASP10
TRAJ20
DEFB128
EZH2
IGHV4-34
IGHD4-11
PIAS3
ARL5B
SOCS6
HLA-E
MIR146
IGHD5-18
FLT3LG
YWHAE
IGHV3-15
FAS
PTH2
IGHD3-22
BTN3A2
HBEGF
BDNF
SLC15A4
OSMR
SEMA3A
CYSLTR2
TRBV6-6
PAK6
MIR223
ABCA1
SEMA3E
CSF1
TRAJ12
PQBP1
NLRP6
TNFSF10
REST
TLR11
CRYAB
LY6G
MUC1
TRBV28
ULK1
SKP2
PTHLH
MAP3K14
SLC40A1
TNFRSF11B
HS3ST2
PKLR
CD36
TRBJ1-5
NUP153
MYH9
MIR10A
LBP
CGB5
TNFSF15
BDKRB2
S100A5
TRBJ2-7
AICDA
XRCC6
LCN12
PIK3C3
SOS2
TLR6
GPI
HTN3
ANGPTL7
IGHV3-30-3
STIM1
KCNH2
TRAF3
CXCR2
PLXNB1
TRAJ2
DHX33
RNASE2
MIRLET7C
STAT4
CD40
FCER2
E2F1
NR0B1
MRGPRX2
DUOX2
TSC22D3
TRAJ44
IGKV3-7
RAET1G
EFTUD2
CASP8
CFH
TAP1
MIR23A
NRIP1
TCHHL1
NRP2
PRDX1
IGLJ1
EHMT2
FGF20
DEFA1A3
HACE1
KRAS
ERAP1
GIP
PSPN
C4A
TMSB4XP8
PPARG
MERTK
IGHV3-69-1
TRBJ2-1
TRBJ1-1
OAS1H
APLNR
JAG1
ST2
CHGA
IRF6
HSPA4
DEFB105B
RHOA
TRH
CCL7
PRKCD
TP73
CALCA
HTR3C
IGKV1-12
CXCL11
TRIM65
TMPRSS6
IL31RA
TRAJ39
CRHR2
TAPBP
MAPT
TRBV4-2
IL1RL1
KIR3DL2
TRIM55
MID1
PLXNC1
TAFA4
HLA-DQB1
IGKV3-11
NRAS
TRAV22
CXCL8
MAPK9
TGTP1
EGR1
CCL17
ESRRG
RIPK2
GLP1R
RLN1
IL36B
PTGFR
TRIM37
VTRNA2-1
IFNL3
IREB2
DEFB107B
SELE
BPIFC
PSMC6
IGKV1D-17
IL17RE
KLRC2
ABCC4
DEFB14
IL1F7
PTPRC
MIR517A
FGF19
PPP3CC
IGKV2-28
NR2E1
EPPIN
CTF1
IFIT2
S100G
PIK3R3
NR5A1
NR3C1
FCN2
IGKV1D-42
TRBV12-3
F11
CLEC4C
MAP2K6
IFITM2
LEFTY1
DCD
CCL27
NLRP13
CD52
IGKV1D-37
IL17A
PPP1CC
YY1
ZC3HAV1
LEPR
LTBP2
MTOR
MIR124-1
TRBJ2-2
DEFB131B
PPBPP1
PGLYRP2
TRAV5
STUB1
INS-IGF2
BNIP3
ILK
ICOSL
CARD6
IL13RA2
HTR3B
SERPINB2
MAPK14
TNFRSF4
FABP3
TRPV2
CBLB
RORB
CCN2
OAS3
CDK6
ANXA6
TRAV13-2
CSK
IGHM
CTSS
LILRA2
ZC3H12A
LCK
TRAJ16
ACKR4
CNTF
RAF1
MAP3K8
AKAP10
STC1
DEFB124
KLRK1
FURIN
DEFB103A
NCR3
IGKV1-17
LTB4R2
HLA-DPA1
INSL5
ZYX
IGHV1-46
EDN3
PLA2G4A
TRGV8
IGHV4-30-4
DRD2
PRLH
SMAD7
VEGFC
VLDLR
MIR467B
MAP2K2
SDC4
TRIM30
MPO
ZBTB16
PDGFB
SUGT1
ELN
IGHV1-18
NTF4
CALR
VIM
LTB
NUDT6
LPCAT2
P2RY13
ZFPM1
IL4RA
DES
IGHV4-39
S100A14
FGFR2
ITGAV
HLA-DMB
GH2
CSF3
ATG5
HLA-A
IGHV3-30
SARM1
EDNRB
CD27
HSPA6
CHUK
CHAT
NR1H2
NLRP7
STAT3
TRIM26
SPHK1
CCL20
RGS13
ROBO1
IL22
ORAI1
IL34
TPH1
IGLV7-46
IFNGR2
USP25
PRKX
ITPR1
TAFA5
ARG1
DUSP1
NPR3
FGF4
TRBV9
SLPI
IRAK3
BCAR1
ZC3HAV1L
ADAM10
TRIM27
STING1
TBKBP1
PAK3
TGFBR1
TREML4
GBP2
NOX4
DEFB104B
CDC42
GRK2
IGKV1-37
MCHR1
VTN
ACVR1C
PYHIN1
CD97
CRIM1
IGHD3-3
CRLF1
ACO1
TRP73
TRBV7-9
OPRL1
NRG2
MYO18A
WAS
SEMA7A
IL15
ATM
TIE1
NR6A1
HSPA1A
ARRB1
CGB2
SCAMP5
EREG
ECSIT
BMP4
IL17RB
QRFP
TRAJ6
TRBJ2-3
AGTR1
H2-AA
EAR11
HSA-MIR-126
MC1R
IFNA5
CAMP
MIR548G
USP2
ISG20L2
TNFSF18
TRAJ31
TRIM61
MMU-MIR-29A
TRAV39
IL1RAP
PPIA
CCL4L1
CASP7
KIR3DL1
IGLJ5
CD46
PTX3
SCGB3A1
TRBV6-9
CCK
IGHD1-14
IGKV2D-24
ADRB2
TRIM9
HJV
SMAD4
CD3D
IGHV3-48
OAS1D
CTSD
RETNLB
STAT6
SEMA3B
TRBV6-2
TUBB3
TRBV30
ADCY8
SCARB1
IL3
PMCH
VAV2
PTCH1
S100A6
UBD
ATG9A
S100A1
TFRC
GREM1
IGHV4-38-2
AVPR2
PELI1
CMTM6
TRBV7-2
ILF3
GOPC
DEFB108F
KEAP1
NUMBL
MUC4
REG3G
RXFP1
DEFB135
GNB2
ELMOD2
SEMA4B
SHC3
TYRO3
S100A8
C7
INHBB
RNF5
SLC10A2
ZBP1
ADRM1
TXLNA
AIP
TNFRSF13C
TRBC2
C4BP
MAP3K1
MR1
IGKV2-40
MB21D1
AZU1
CSH1
IGHV1-3
LCNL1
MIR133A1
ACHE
TNFRSF12A
SKIV2L
CLEC10A
ATF4
SERPIND1
OASL
GPHA2
IFRD1
IL12A
WDFY1
CTCF
MTNR1A
CCL2
MIR125A
KPNA1
TXNIP
PSMC1
RFXANK
TRAJ43
MIR187
S100A11
IL27
CLTC
IGLV11-55
SIGLEC6
IL6
TLR3
IFNA16
HMGB2
FGF14
TRPM5
TRAJ46
CCL24
TRAV8-4
ANGPT1
PTGDR2
TRIM58
VIPR2
SEMA6A
PSME1
CCL15-CCL14
PSMD14
PRLHR
MIR15B
EPOR
XCL2
LTB4R
TRAV16
ISG15
IGKV2-30
FXR1
MX2
IGHV4-61
HSA-MIR-152
CASP3
HSP90AA1
IGLV5-45
DUOX1
CCRL2
SIAH1
ACAP1
FGFRL1
MBL1
DHX9
CXCR5
TMSB4Y
KDM1
VDR
ACE
IRF4
PRKCE
JAG2
DEFA3
SERPINA9
RGS2
IFNL2
[truncated: 661 more rows]

## Sheet: 44 genes with significant progn
id	HR	HR.95L	HR.95H	pvalue
KBTBD8	0.73445	0.573251	0.940979	0.0146411
BTLA	0.733444	0.563372	0.954857	0.02127
AHSG	1.57632	1.27194	1.95355	3.21971e-05
ABCD2	0.64821	0.441298	0.952137	0.0271069
IRF8	0.832164	0.70955	0.975966	0.0238773
HS3ST2	0.867701	0.756656	0.995043	0.0422457
SIT1	0.799047	0.66361	0.962126	0.0179128
HPX	1.19711	1.01631	1.41008	0.0312672
P2RY13	0.815449	0.669383	0.993387	0.0427809
TNNT2	1.29274	1.09364	1.52809	0.0026217
WT1	1.17617	1.0265	1.34768	0.0194641
FCER2	0.65008	0.496163	0.851744	0.00178406
DNASE2B	0.75691	0.584376	0.980383	0.0348527
CD48	0.828637	0.720063	0.953581	0.00870882
CD200R1	0.615236	0.463796	0.816123	0.000753356
PTPRC	0.838473	0.717992	0.979172	0.0260212
P2RY10	0.809809	0.675572	0.97072	0.0225291
TNFSF8	0.778108	0.612611	0.988313	0.0397523
SERPINA9	0.54613	0.31559	0.94508	0.0306306
TAGAP	0.821139	0.683239	0.986872	0.0356545
TLR7	0.828807	0.700886	0.980075	0.0281447
CCR6	0.74483	0.569885	0.973479	0.0310258
LILRA4	0.777184	0.614671	0.982664	0.0351978
LAX1	0.864142	0.752925	0.991787	0.0377747
CYP24A1	1.08444	1.00417	1.17113	0.038823
SIGLEC8	0.799722	0.645894	0.990186	0.0403211
GPR174	0.757903	0.611498	0.93936	0.0113677
RHOV	1.26212	1.12132	1.42059	0.000114561
SH2D1A	0.831754	0.698987	0.989739	0.0378745
BTK	0.813546	0.691425	0.957236	0.012896
TINAG	1.26724	1.10677	1.45098	0.00060692
IRF4	0.844845	0.716027	0.996839	0.0457733
RGS13	0.682596	0.491774	0.947464	0.0224566
CCR2	0.696498	0.561068	0.864617	0.0010433
HLA-DQA1	0.912853	0.833556	0.999694	0.0492337
GPR31	0.458349	0.214606	0.978925	0.0439068
TCL1A	0.796205	0.658761	0.962325	0.0184146
MUC2	1.10668	1.005	1.21865	0.0392629
GIMAP6	0.76381	0.600562	0.971433	0.0280768
KRTAP5-8	1.42607	1.04545	1.94526	0.0250572
CX3CR1	0.833934	0.707418	0.983077	0.0305194
CLEC10A	0.839212	0.708833	0.993572	0.0418682
HLA-DMB	0.822803	0.705085	0.960175	0.0132918
CD52	0.839056	0.726101	0.969583	0.017375
